# Supplementary material
Source: ML conference proceedings conference paper supplement (https://openreview.net/forum?id=5xdbWUdM87)
Supplement: supplementary_material [file NeurIPS_2025_minmax_games_overparameterization-4.pdf › NeurIPS_2025_minmax_games_overparameterization-4.pdf]

---

# Solving Neural Min-Max Games: The Role of Architecture, Initialization & Dynamics

---

Deep Patel and Emmanouil-Vasileios Vlatakis-Gkaragkounis

Department of Computer Science  
University of Wisconsin-Madison  
{dbpatel15, vlatakis}@wisc.edu

## Abstract

Many emerging applications—such as adversarial training, AI alignment, and robust optimization—can be framed as zero-sum games between neural nets, with von Neumann–Nash equilibria (NE) capturing the desirable system behavior. While such games often involve non-convex non-concave objectives, empirical evidence shows that simple gradient methods frequently converge, suggesting a hidden geometric structure. In this paper, we provide a theoretical framework that explains this phenomenon through the lens of *hidden convexity* and *overparameterization*. We identify sufficient conditions—spanning initialization, training dynamics, and network width—that guarantee global convergence to a NE in a broad class of non-convex min-max games. To our knowledge, this is the first such result for games that involve two-layer neural networks. Technically, our approach is twofold: (a) we derive a novel path-length bound for the alternating gradient descent–ascent scheme in min-max games; and (b) we show that the reduction from a hidden convex–concave geometry to two-sided Polyak–Łojasiewicz (PL) min-max condition hold with high probability under overparameterization, using tools from random matrix theory.

## 1 Introduction

At the Nobel Symposium marking the centennial of Game Theory [31, 83], a key challenge was posed:

*the development of a systematic theory for non-convex games*

spurred by the rapid growth of deep learning in incentive-aware multi-agent systems [104, 130].

Indeed, many influential modern AI systems are built upon the fusion of foundational game-theoretic principles—particularly zero-sum games—with the expressive capacity of neural networks. Notable examples include generative adversarial networks (GANs) [51], robust reinforcement learning [89], adversarial attacks [117], domain-invariant representation learning [44], distributionally robust optimization [77, 123], and multi-agent environments featuring natural language interactions, such as AI safety debates between large language models and verifier-prover systems [56, 16]. In these settings, the game-theoretic framework provides a natural and interpretable objective—typically an equilibrium solution endowed with strong normative appeal, such as the celebrated von Neumann minimax points [48] and Nash–Rosen equilibria [80, 94].

At the same time, much of the remarkable progress at the intersection of deep learning and game theory stems from the capacity of deep models to operate effectively in environments with large, often continuous, state and action spaces. Iconic examples include Go [103], autonomous driving [102], Texas Hold'em poker [15], and real-time strategy games such as StarCraft II through AlphaStar [112].

Tackling such large-scale decision-making problems has necessitated the combination of expressive architectures with function-approximation-based learning, replacing high-dimensional reward/value functions and strategy/policy spaces with trainable surrogates. Hence, these surrogates act as flexible intermediaries, enabling generalization across complex environments without exhaustive enumeration of action spaces. While theoretical focus has largely remained on linear approximators [121, 26], it is the nonlinear models—such as kernels and deep neural networks—which in practice dramatically expand representational power [67, 58], allowing richer strategic behaviors. Thus, agents’ policies are encoded through powerful approximators, and equilibrium learning unfolds through iterative parameter tuning (see Figure 1).

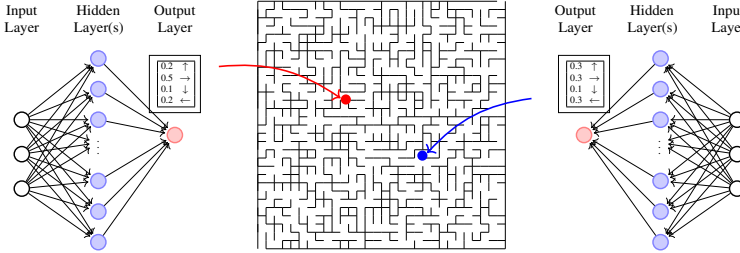

Figure 1: Illustration of a maze environment where each agent must reason over a vast space of action sequences. Instead of explicitly constructing and searching the full decision tree, a neural network implicitly encodes both the value of paths and the policy for navigation, learning an effective strategy dynamically without ever uncovering the complete structure of the maze.

Despite the empirical success, algorithms with provable convergence guarantees remain scarce. This is unsurprising given that even in finite games, strong computational hardness results [22, 23, 32, 87] and dynamic impossibility theorems [78, 53, 52, 116, 46, 47] pose significant barriers. Notably, even in two-player zero-sum games—where classical theory guarantees existence and efficient computation of minimax points via LP duality [19] or optimistic first-order methods [120, 5]—these assurances collapse when modern deep-learning architectures, with their inherent non-convexity, are introduced [34, 10, 6]. Specifically: (i) global solution concepts (e.g., von Neumann minimax, Nash equilibria) may fail to exist; (ii) even when they do, tandem gradient-based methods often suffer from *instability*, *cycling*, or *divergence*, resulting in poor solutions. [33, 75, 35, 113].

Thus, the best hope for mitigating the practical impact of these worst-case hardness results lies in focusing on structured subclasses of games. It remains plausible that broad families of non-concave games—rich enough to capture multi-agent interactions—admit tractable local or even global equilibria.

**Hidden convexity: a promising direction.** One compelling approach along this path is the emerging theory of *hidden convex games* [114, 79, 115, 99, 29]. In its simplest form, two players interact via a convex–concave zero-sum game  $Loss(\text{Player}_1, \text{Player}_2)$ , but control only high-dimensional parameters  $\theta, \phi$ , through mappings  $\text{Player}_1 \leftarrow \text{Map}_\theta^1(\cdot)$  and  $\text{Player}_2 \leftarrow \text{Map}_\phi^2(\cdot)$ . These mappings are smooth and known, allowing gradient-based training, but typically not efficiently invertible, reflecting the practical irreversibility of neural architectures. Consequently, while the latent game preserves convex–concave structure, the optimization landscape  $Loss(\text{Map}_\theta^1, \text{Map}_\phi^2)$  over control variables becomes highly non-convex [see 99, p. 26]. Although not every non-convex game admits such a structure, many practical applications naturally fit within this framework (see Appendix B).

**Rank collapse: the fragility of hidden convexity.** A major criticism of the hidden convexity paradigm relies critically on the assumption that the Jacobian of the agents’ mappings maintain uniformly bounded singular values throughout training. In practice, such uniform bounds often fail, as real-world architectures may suffer from rank collapse or near-singular behavior during optimization (see, e.g., [101, 43, 37]), undermining theoretical guarantees. When such degeneracies arise, convergence rates can deteriorate exponentially, and worst-case bounds may become vacuous. Even if Jacobian well-conditioning is achieved by a random initialization, there are no assurances that it will be preserved as training evolves.

These limitations underscore the need for explicit, open-box conditions—beyond abstract hidden mappings—that explain the empirical success of efficient training in large-scale min-max settings. Whilst hidden convexity provides significant insights about these systems, it does not answer a fundamental behavioral question:

*Can appropriate architectural design, initialization protocols, and training dynamics jointly ensure efficient convergence in large-scale neural min-max games?* (★)

## 1.1 Setting and Main Contribution

Motivated by the above challenges, we provide—to the best of our knowledge—the first quantitative convergence guarantees addressing the central question (★) under minimal assumptions. Formally, given input datasets  $\mathcal{D}_F$  and  $\mathcal{D}_G$ , and latent strategy spaces  $\mathcal{S}_F$  and  $\mathcal{S}_G$ , we consider the hidden min-max problem

$$\min_{\theta \in \mathbb{R}^{d_\theta^{(F)}}} \max_{\phi \in \mathbb{R}^{d_\phi^{(G)}}} \mathcal{L}_{\mathcal{D}}(F_\theta, G_\phi), \quad (\text{II})$$

where  $F_\theta : \mathbb{R}^{d_0^{(F)}} \rightarrow \mathbb{R}^{\dim(\mathcal{S}_F)}$  and  $G_\phi : \mathbb{R}^{d_0^{(G)}} \rightarrow \mathbb{R}^{\dim(\mathcal{S}_G)}$  are smooth mappings parameterized by  $\theta$  and  $\phi$  (e.g., neural network weights). While our results extend beyond, we focus on well-studied [127] *separable* latent minmax objectives of the form

$$\mathcal{L}_{\mathcal{D}}(F, G) = I_1^{\mathcal{D}_F}(F) + I_2^{\mathcal{D}}(F, G) - I_3^{\mathcal{D}_G}(G), \quad (1)$$

where  $\mathcal{D} = (\mathcal{D}_F, \mathcal{D}_G)$  and  $I_1^{\mathcal{D}_F}, I_3^{\mathcal{D}_G}$ —the *individual components*—are strongly convex and smooth, and  $I_2^{\mathcal{D}}$ —the *coupling component*—is smooth bilinear. As convergence metric, we adopt the *Nash gap* (also known as the *Nikaido–Isoda duality gap* [82]):

$$\text{DG}_{\mathcal{L}_{\mathcal{D}}}(\theta, \phi) := \max_{\phi'} \mathcal{L}_{\mathcal{D}}(F_\theta, G_{\phi'}) - \min_{\theta'} \mathcal{L}_{\mathcal{D}}(F_{\theta'}, G_\phi),$$

and say that  $(\hat{\theta}, \hat{\phi})$  is an  $\epsilon$ -saddle (or  $\epsilon$ -approximate minimax or Nash equilibrium) if  $\text{DG}_{\mathcal{L}_{\mathcal{D}}}(\hat{\theta}, \hat{\phi}) \leq \epsilon$ .

**Remarks.** Replacing players’ actions with neural nets—i.e.,  $F_\theta = \text{NN}_\theta(\cdot)$  and  $G_\phi = \text{NN}_\phi(\cdot)$ —renders the end-to-end landscape highly non-convex, although the latent game  $\mathcal{L}$  remains convex–concave. The separable structure naturally unifies several hidden zero-sum regimes: when  $I_2$  vanishes, it recovers *separable strongly-convex–concave* games; when  $I_1$  and  $I_3$  vanish, it reduces to *bilinear games* [114]; and when both components are present, it captures *regularized games* (e.g., Tikhonov- or entropy-regularized settings), recently used in hidden min-max frameworks, including team and zero-sum Markov games [59, 60]. We discuss concrete examples in Section 2 and Appendix B. In these settings, regularization plays a critical role in stabilizing dynamics and mitigating chaotic behaviors, both empirically (see 99, p. 26] and theoretically (cf. [115, pp. 7–8], [59]). Before enumerating our technical contributions, we highlight a key result addressing (★):

**Informal Theorem** (Theorem 3.8). *There exists a decentralized, gradient-based method (eq. (AltGDA)) that computes, with high probability under suitable Gaussian random initialization, an  $\epsilon$ -approximate Nash equilibrium for any  $\epsilon > 0$  in broad class of hidden convex-concave zero-sum games, where each player’s strategy is parameterized by a sufficiently wide two-layer neural network.*

- The number of iterations required scales as

$$O\left(\text{poly}\left(\frac{1}{\text{width}_1}, \frac{1}{\text{width}_2}, \frac{1}{n}, d_{\text{input}}\right) \times \frac{L^3}{\mu^3} \times \log\left(\frac{1}{\epsilon}\right)\right),$$

where  $\text{width}_1, \text{width}_2$  are the hidden layer widths,  $n$  is the number of training samples,  $d_{\text{input}}$  is the input dimension,  $L$  is the smoothness constant, and  $\mu$  is the strong convexity modulus of the latent objective.

- This guarantee holds provided the network  $\text{width}_{1,2} = \tilde{\Omega}\left(\mu^2 \frac{n^3}{d_{\text{input}}}\right)$ .

**A converse byproduct: input-optimization games.** We also uncover a new convergence guarantee in a related but distinct setting: *optimizing directly over inputs when the neural network mappings are fixed*. This perspective is motivated both by adversarial example generation through min-max formulations (see Section 2, Appendix B & [117]) and by empirical results of [99] for solving normal form zero-sum games using input-optimization at random fixed neural network mappings—without theoretical justification of non-singularity of spectrum trajectory. Formally, the goal is to find input vectors  $(x_{\text{Alice}}, x_{\text{Bob}})$  that implement a Nash equilibrium:

$$\min_{x_{\text{Alice}} \in \mathcal{D}_F} \max_{x_{\text{Bob}} \in \mathcal{D}_G} \mathcal{L}(F_\theta(x_{\text{Alice}}), G_\phi(x_{\text{Bob}})). \quad (\text{III}^{-1})$$

for some convex–concave function  $\mathcal{L}$ , typically referred as attack’s loss [117]. In this regard, we formally establish that Algorithm AltGDA converges to an  $\epsilon$ -Nash equilibrium with iteration complexity  $\tilde{O}\left(\frac{1}{\epsilon} \log\left(\frac{1}{\epsilon}\right)\right)$  under high-probability guarantees (Theorem 3.5). To the best of our knowledge, this provides the first open-box, provable convergence result for input-optimization attacks based on randomly initialized overparameterized neural networks, matching and theoretically explaining the experimental observations of [99] and [117].

## 1.2 Challenges and Our Approach: Bridging Overparameterization with Strategic Learning

**Back to minimization.** The optimization of min-max objectives—especially convex–concave or structured non-convex games—has been extensively studied (for an appetizer see Appendix A.1-A.2 and references therein). However, the dynamics of gradient-based methods in games where players are parameterized by neural networks remain far less understood. In minimization of training loss, a powerful lens for analyzing the success of gradient descent (GD) is the theory of *overparameterization* and the *Neural Tangent Kernel* (NTK). In the infinite-width limit, GD converges provided the NTK’s smallest eigenvalue remains bounded away from zero. For finite-width networks, convergence proofs typically hinge on two ingredients: (i) good NTK conditioning at initialization, and (ii) negligible drift of the NTK during training [85, 27, 13, 106], ensuring that an underlying Polyak–Łojasiewicz (PŁ) condition is maintained.

**Extending to Games: The spectrum path.** Even simple hidden zero-sum games, where players are parameterized by two-layer neural networks with smooth activations, can cause vanilla GDA to diverge arbitrarily [114]. Although PŁ-based convergence for minimization has been understood since the classical works of Polyak and Łojasiewicz [90, 73], analogous results for min-max optimization have only recently emerged [124, 125, 60]. More recently, hidden convexity has been shown to imply a PŁ structure—both in minimization [41] and in min-max games [60]. However, this reduction to PŁ-condition reveals a key technical obstacle: hidden convexity alone cannot safeguard convergence if the Jacobians of the players’ mappings suffer from near-singularities—i.e., if the least singular value approaches zero. In this regime, the effective PŁ-modulus degenerates, the gradient dominance property and convergence guarantees break down. Thus, the evolution of singular values under the employed learning dynamics becomes central challenge.

In this work, we adopt the *alternating gradient descent-ascent* (AltGDA) method, which mirrors natural sequential play between agents. From a technical standpoint, alternation proves crucial: simultaneous one-timescale GDA (SimGDA) may diverge both in case of hidden convex–concave games [114] and two-sided-PŁ games [124]. Additionally, alternation has been explored as an acceleration and stabilization tool for min-max optimization [66, 128].

- **AltGDA Path Length:** Hence, our first central technical contributions is a tight control of the *path length* of AltGDA iterates (Lemma 3.3). We show that AltGDA trajectories remain confined within a bounded region around initialization, preventing severe deterioration of hidden convex–concave structure (e.g., Jacobian conditioning). While path-length bounds are relatively straightforward in minimization—by directly unrolling GD iterations—in min-max problems, the alternating structure introduces significant complications for such ad-hoc analysis. To circumvent this, we employ a carefully designed *potential function*—a weighted interpolation between the two players’ Nash gaps— by [124], which may be of independent interest.

Beyond bounding the trajectory, two additional challenges arise relative to standard supervised learning:

- **Output Dimension:** In games, neural networks output distributions over actions or more generally higher-dimensional vectors, unlike scalar labels in classification tasks. Estimating the singular value spectrum of such vector-output neural networks is more subtle. To address this, we arrive at Lemma 3.7, by adapting techniques from [106] which essentially combines Hermite expansions of hidden layer outputs, first-order Taylor series expansion and Lipschitzness of Jacobians, and high-probability concentration bounds for random Gaussian matrices.
- **Average-Case Analysis of Input Min-Max Games:** A similar approach is employed for input-optimization games, where the roles of inputs and weights are reversed. From a worst-case perspective, there exist constructions leading to rank-deficient Jacobians and failure of GDA due to convergence to spurious local optima [114], our analysis takes an average-case view. Specifically, we show that min-max input attacks, solved via AltGDA, succeed with high probability when the neural network mappings are randomly sampled with Gaussian initializations (Theorem 3.5).
- **General Loss Structures:** Unlike many prior works, which rely on the non-linear least squares structure of supervised losses to control dynamics [106, 69, 70], we allow general separable latent objectives combining strongly convex regularizers and bilinear couplings. This more general setting requires significantly stronger control on the optimization trajectory and leads to a fundamentally different overparameterization scaling, namely  $\Omega(n^3)$  compared to  $\Omega(n)$  in pure minimization settings (Theorem 3.8)

## 2 Preliminaries

We begin by introducing the standard notions of smoothness and Lipschitz continuity that will be used throughout this work. All norms are taken to be the Euclidean ( $\ell_2$ ) norm unless otherwise stated.

**Lipschitz Continuity, Smoothness, and Strong Convexity.** Let  $f : \mathbb{R}^d \rightarrow \mathbb{R}$  be a differentiable function. We say that  $f$  is  $L_f$ -Lipschitz continuous and  $L_{\nabla f}$ -smooth if there exist constants  $L_f, L_{\nabla f} > 0$  such that

$$|f(u) - f(v)| \leq L_f \|u - v\|, \quad \|\nabla f(u) - \nabla f(v)\| \leq L_{\nabla f} \|u - v\|, \quad \forall u, v \in \mathbb{R}^d.$$

Moreover,  $f$  is  $\mu$ -strongly convex if there exists  $\mu > 0$  such that

$$f(v) \geq f(u) + \langle \nabla f(u), v - u \rangle + \frac{\mu}{2} \|v - u\|^2, \quad \forall u, v \in \mathbb{R}^d.$$

Similarly, for a parametrized mapping (e.g., the neural network)  $M_\theta(x) : \mathbb{R}^{d_0} \rightarrow \mathbb{R}^{d_2}$  with parameters  $\theta \in \mathbb{R}^M$ , we say  $M_\theta$  is  $\beta_M$ -smooth (w.r.t.  $\theta$ ) at fixed input  $x$  if

$$\sigma_{\max}(\nabla_\theta M_\theta(x) - \nabla_\theta M_{\theta'}(x)) \leq \beta_M \|\theta - \theta'\|, \quad \forall \theta, \theta' \in \mathbb{R}^M, \quad (2)$$

where  $\sigma_{\max}(\cdot)$  denotes the largest singular value and  $\nabla_\theta M_\theta(x)$  is the Jacobian of  $M_\theta(x)$  with respect to  $\theta$ .

**Finite-Sample Parametrized Min-Max Setting.** Then, we unroll the general hidden convex–concave model of (I) to the finite-sample empirical risk minimization (ERM) setting, assuming access to a (possibly labeled) dataset  $\mathcal{D} = (\mathcal{D}_F, \mathcal{D}_G) = \{(x_i, y_i)\}_{i=1}^n$  of size  $n$ . Formally, we consider the following optimization problem:

$$\min_{\theta \in \mathbb{R}^{d_\theta^{(F)}}} \max_{\phi \in \mathbb{R}^{d_\phi^{(G)}}} \mathcal{L}_{\mathcal{D}}(F_\theta, G_\phi) := I_1^{\mathcal{D}_F}(F_\theta) + I_2^{\mathcal{D}_F, \mathcal{D}_G}(F_\theta, G_\phi) - I_3^{\mathcal{D}_G}(G_\phi), \quad (\diamond)$$

where the mappings  $F_\theta : d_0^{(F)} \rightarrow \mathbb{R}^{\dim(S_F)}$  and  $G_\phi : d_0^{(G)} \rightarrow \mathbb{R}^{\dim(S_G)}$  are smooth functions parametrized by  $\theta$  and  $\phi$  (e.g., neural networks). The individual components and the bilinear coupling expand as:

- $I_1^{\mathcal{D}_F}(F_\theta) = \sum_{i \in \llbracket \mathcal{D}_F \rrbracket} \ell_i(y_i, F_\theta(x_i))$ ,  $I_3^{\mathcal{D}_G}(G_\phi) = \sum_{j \in \llbracket \mathcal{D}_G \rrbracket} \ell_j(y_j, G_\phi(x_j))$ ,
- $I_2^{\mathcal{D}_F, \mathcal{D}_G}(F_\theta, G_\phi) = \sum_{i \in \llbracket \mathcal{D}_F \rrbracket} \sum_{j \in \llbracket \mathcal{D}_G \rrbracket} F_\theta(x_i)^\top A(x_i, x_j, y_i, y_j) G_\phi(x_j)$ ,

where for each sample pair  $e_{ij}(x_i, x_j, y_i, y_j)$ , the coupling matrix  $A(x_i, x_j, y_i, y_j) \in \mathbb{R}^{\dim(S_F) \times \dim(S_G)}$  encodes interactions between players.

**Blanket Assumptions on the Loss and Coupling Terms.** We impose the following structural assumptions on the loss components and bilinear couplings appearing in the finite-sample min-max objective ( $\diamond$ ).

**Assumption 2.1** (Smoothness, Hidden Strong Convexity, and Gradient Control).

- (i) **Smoothness:** Each sample-wise individual loss  $\ell(y, \text{Map}_w(x))$  is differentiable and  $L$ -smooth with respect to  $\text{Map}_w(x)$ .
- (ii) **Coupling Structure:** Each bilinear coupling matrix  $A(x_i, x_j, y_i, y_j)$  is known, fixed, and has bounded operator norm.
- (iii) **Hidden Strong Convexity:** Each sample-wise individual loss  $\ell(y, h = \text{Map}_w(x))$  is strongly convex with respect to the neural network output  $h$ .
- (iv) **Gradient Growth Condition:** There exist constants  $A_1, A_2, A_3 > 0$  such that for all  $h \in \mathbb{R}^{d_{\text{out}}}$  and  $y \in \mathcal{Y}$ , the (latent) gradient of each loss  $\ell(y, h)$  satisfies:

$$\|\nabla_h \ell(y, h)\| \leq A_1 \|h\| + A_2 \text{diam}(\mathcal{Y}) + A_3.$$

**Remark 2.2.** Item (i) ensures the applicability of gradient-based methods, while Items (i)–(iii) imply that the overall loss  $\mathcal{L}_{\mathcal{D}}$  is  $(L_{\mathcal{L}}, L_{\nabla \mathcal{L}})$ -smooth and  $(\mu_\theta, \mu_\phi)$ -hidden-strongly convex–concave, with constants determined by the structure of  $\ell$  and  $A(\cdot)$ . For standard strongly convex losses (e.g., MSE, logistic loss, cross-entropy with  $\ell_2$ -regularization), the gradient with respect to the network output

is controlled as in Item (iv) by an affine function of the output norm, with the leading coefficient proportional to the strong convexity modulus,  $A_1 = \Theta(\mu)$ .<sup>1</sup>

### Neural Network and Training Data Model.

**Definition 2.3** (Two-layer Neural Network). We consider two-layer neural networks (often referred to as shallow networks). Specifically, such a network  $h$  is defined by:

$$h(x) = \text{Map}_{w=(W_1, W_2)}(x) = W_2^{(h)} \psi \left( W_1^{(h)} x \right),$$

where  $x \in \mathbb{R}^{d_0^{(h)}}$ ,  $W_1^{(h)} \in \mathbb{R}^{d_1^{(h)} \times d_0^{(h)}}$ ,  $W_2^{(h)} \in \mathbb{R}^{d_2^{(h)} \times d_1^{(h)}}$ , and  $\psi : \mathbb{R} \rightarrow \mathbb{R}$  is an activation function applied coordinate-wise.

**Assumption 2.4** (Properties of the Two-layer Neural Network). We assume:

- $h(\cdot)$  is twice-differentiable and  $\beta_h$ -smooth with respect to  $(W_1^{(h)}, W_2^{(h)})$ .
- $\psi$  is twice-differentiable with  $\psi(0) = 0$ , bounded first and second derivatives  $(\dot{\psi}_{\max}, \ddot{\psi}_{\max})$ , and finite Hermite norm  $\|\psi\|_{\mathcal{H}} < \infty$ <sup>2</sup>.
- The training data  $(X, Y) \in \mathbb{R}^{d_0^{(h)} \times n} \times \mathbb{R}^{d_2^{(h)} \times n}$  satisfies  $\|x_i\| = 1 \forall i \in [n]$  and  $\|Y\| \leq 1$ .
- $\sigma_{\max} \left( (W_2^{(h)})_k \right) = \mathcal{O} \left( \frac{\dot{\psi}_{\max}}{\dot{\psi}_{\min}} \right)$  for all  $k \in \mathbb{Z}_{\geq 0}$ <sup>3</sup>.

Although we assume the activation function  $\psi$  to be twice differentiable—thereby excluding non-smooth activations such as ReLU—our results naturally extend to smooth approximations like the Gaussian Error Linear Unit (GeLU) [55] and the softplus function [39], which have been shown empirically to perform comparably or even better than ReLU in several settings<sup>4</sup> [12, 40]. The performance of gradient-based training depends critically on the geometry of the training data. A standard proxy for data diversity is the well-conditioning of sample matrix  $X$  (with input vectors as rows), under standard random designs such as isotropic or sub-Gaussian inputs [86, 110, 111, 95].

**Assumption 2.5** (Spectral Properties of the Data Matrix). Let  $X \in \mathbb{R}^{n \times d}$  denote the data matrix whose rows  $x_i$  satisfy  $\|x_i\|_2 = 1$  for all  $i$ . We assume that the number of samples satisfies  $n \geq d$ , and that  $X$  is "generic" in the sense that  $\sigma_{\min}(X^{*r}) = \Omega(1)$  and  $\sigma_{\max}(X) = \mathcal{O}(\sqrt{n/d})$ <sup>5</sup>, where  $n$  is the number of samples and  $d$  is the ambient input dimension.

For a fair comparison with the minimization literature, in the main body of the paper we adopt the data genericity assumption. Interested readers can refer to appendix for fine-grained width bounds.<sup>6</sup>

**Solution concept.** Note that while our min-max objective  $\mathcal{L}_{\mathcal{D}}(F_{\theta}, G_{\phi})$  is not convex–concave in  $F_{\theta}, G_{\phi}$ , it is (strongly) convex–concave in the outputs of  $F_{\theta}$  and  $G_{\phi}$ , i.e., hidden strongly-convex–concave. Our analysis leverages precisely this *hidden* structure. Specifically, [41, Proposition 2] states that if  $\min_{\theta} f(\theta)$  where  $f(\theta) = F(H(\theta))$  and  $F$  is strongly convex while  $H$  is a smooth map (e.g., a neural net), then  $f$  satisfies the PŁ-condition. Thus, hidden strong convexity implies PŁ-condition, even for nonconvex objectives. Utilizing this along with [30, Proposition of 4.1], we can define PŁ-moduli for our min-max objective in terms of the smallest singular values of the neural network Jacobians:

<sup>1</sup>Controlling the gradient growth is critical for non-asymptotic overparameterization bounds, as it ensures that iterates remain within regions where hidden convexity persists. A detailed discussion and examples are deferred to Appendix D.

<sup>2</sup>This is needed for upper bound on maximum singular value of  $h$ 's Jacobian.

<sup>3</sup>Given random Gaussian initialization and ensuring that iterates never leave a finite-radius ball around initialization, we can safely assume the maximum singular value is bounded from above for all iterates  $k$ .

<sup>4</sup>Moreover, we expect that the smoothness assumption can be relaxed. Since AltGDA includes subgradient variant, our analysis could likely be extended to (almost) smooth activations such as ReLU, by carefully treating the measure-zero set of non-differentiability points. We leave this technical refinement to future work, as the core phenomena should remain qualitatively unchanged.

<sup>5</sup> $\sigma_{\max}(X) = \mathcal{O}(\sqrt{n/d})$  w.h.p. when, for e.g.,  $X$  has i.i.d.  $\mathcal{N}(0, 1)$  entries [86, Section II.A]. For an arbitrary, fixed  $X$ ,  $\sigma_{\max}(X) = \|X\|_2 \leq \|X\|_F = \sqrt{n} (\because \|x_i\|_2 = 1 \forall i)$ . See Remark G.5 in Appendix G.

<sup>6</sup>The assumption  $n \gtrsim d$  ensures that  $X$  is sufficiently tall to avoid rank deficiency and the minimum singular value of the Khatri-Rao product  $\sigma_{\min}(X^{*r})$  serves as natural measures of the dataset's well-conditioning. Intuitively, Assumption 2.5 reflects that the dataset covers the input space sufficiently uniformly, ensuring that no direction is either too collapsed or too amplified. Such a balance is critical for achieving stable optimization dynamics and avoiding pathological trap into lower-dimensional subspaces during training.

**Fact 2.6** (Reduction to Two-Sided PL-condition [41, 30]). The loss function  $\mathcal{L}_{\mathcal{D}}$  satisfies a two-sided Polyak–Łojasiewicz (PL) condition with parameters  $\mu_{\theta}\sigma_{\min}^2(\nabla_{\theta}F_{\theta})$  and  $\mu_{\phi}\sigma_{\min}^2(\nabla_{\phi}G_{\phi})$ , where  $\sigma_{\min}(\cdot)$  denotes the smallest singular value of the corresponding Jacobian mappings.

This reduction resolves several challenges inherent to general nonconvex–nonconcave min-max problems. First, it unifies several optimality notions—namely, *global minimax*, *saddle point*, and *gradient stationarity*—which, in general settings, need not coincide. For formal definitions see Appendix E. In the case where the objective satisfies a two-sided Polyak–Łojasiewicz (PL) condition, these notions become equivalent even at their  $\epsilon$ -approximate versions. We formalize this via the following lemma:

**Lemma 2.7** (Lemma 2.1 in [124], Appendix C in [60]). *If the objective function  $f$  satisfies the two-sided PL-condition, then all three notions in Definition E.1 are equivalent:*

$$\epsilon - (\text{Saddle Point}) \iff \epsilon - (\text{Global Min-Max}) \iff \epsilon - (\text{Stationary Point}) \quad \forall \epsilon \geq 0$$

Second, as discussed in the introduction, saddle points may not exist in general nonconvex–nonconcave problems. Therefore, we explicitly adopt the following benign<sup>7</sup> assumption:

**Assumption 2.8** (Existence of Saddle Points). The objective function  $\mathcal{L}(\theta, \phi)$  admits at least one saddle point. Moreover, for any fixed  $\phi$ ,  $\min_{\theta \in \mathbb{R}^m} \mathcal{L}(\theta, \phi)$  has a non-empty solution set and a finite minimum value. Similarly, for any fixed  $\theta$ ,  $\max_{\phi \in \mathbb{R}^n} \mathcal{L}(\theta, \phi)$  has a non-empty solution set and a finite maximum value.

**Examples of hidden neural min-max optimization.** Due to space limitations, we defer a comprehensive list of examples and references to Appendix B. To build intuition, we present below two representative bilinear examples that highlight the key structural differences. We broadly distinguish two principal types of ML-driven min-max problems

- **Network Optimization:** Problems where optimization is performed over neural network parameters given a fixed dataset (training over weights). *This setting captures tasks such as generative modeling or robust adversarial reinforcement learning.*

$$\text{Example : } \min_{\theta} \max_{\phi} F_{\theta}(x)^{\top} AG_{\phi}(x').$$

- **Input Optimization:** Problems where network parameters are fixed (e.g., random initialization), and optimization occurs over the input space (e.g., adversarial perturbations). *This corresponds to input-driven optimization problems such as adversarial attack design.*

$$\text{Example : } \min_{x_{\text{Alice}} \in \mathcal{D}_F} \max_{x_{\text{Bob}} \in \mathcal{D}_G} (F_{\theta}(x_{\text{Alice}})^{\top} AG_{\phi}(x_{\text{Bob}})).$$

### 3 Our Results

*Alternating Gradient Descent-Ascent* (AltGDA) proceeds by sequentially updating the parameters of the min-player  $\theta$  and the max-player  $\phi$ , leveraging the most recent gradient information at each step. The updates take the form:

$$\theta^{(t)} = \theta^{(t-1)} - \eta_{\theta} \nabla_{\theta} \mathcal{L}_{\mathcal{D}}(\theta^{(t-1)}, \phi^{(t-1)}), \quad \phi^{(t)} = \phi^{(t-1)} + \eta_{\phi} \nabla_{\phi} \mathcal{L}_{\mathcal{D}}(\theta^{(t)}, \phi^{(t-1)}) \quad (\text{AltGDA})$$

where  $\eta_{\theta}, \eta_{\phi} > 0$  denote the respective step sizes.

Our analysis builds upon the framework of Yang, Kiyavash, and He [124], which guarantees  $\log(1/\epsilon)$  convergence under a two-sided PL condition. In our setting, the PL moduli depend on the smallest singular values  $\sigma_{\min}$  of the Jacobians  $\nabla_{\theta}F_{\theta}$  and  $\nabla_{\phi}G_{\phi}$ , which must remain bounded away from zero throughout the optimization trajectory (Fact 2.6). This dependence is critical, as both the PL constants and the step sizes in AltGDA scale inversely with  $\sigma_{\min}$ .

<sup>7</sup>This assumption is mild in our setting for two reasons:

- In generative tasks such as GANs, the existence of a saddle point corresponds to operating in the *realization regime*, where the generator can fully match the data distribution [51].
- Following Gidel et al. [48], if the parameter spaces for  $\theta$  and  $\phi$  are bounded, saddle point existence can be guaranteed by classical minimax theorems. While we do not explicitly constrain the parameter spaces, our analysis shows that the iterates of the Alternating GDA (AltGDA) method remain confined within a bounded region. Thus, we can effectively assume boundedness without loss of generality.

Hence, we first establish that, under suitable random initialization and sufficient overparameterization, the initialization satisfies  $\sigma_{\min}(\nabla_{\theta}F_{\theta}), \sigma_{\min}(\nabla_{\phi}G_{\phi}) \geq cB$  with high probability (see Lemmas 3.4 and 3.7). Furthermore, by smoothness of the neural mappings, there exists a Euclidean ball  $\mathcal{B}((\theta_0, \phi_0), R)$  within which the singular values of the Jacobians remain well-conditioned, i.e.,  $\sigma_{\min} > B > 0$ . The radius is given by  $R = \frac{\mu_{\text{Jac}}}{2\beta}$ , where  $\mu_{\text{Jac}} := \max\{\mu_{\text{Jac}}^{(F)}, \mu_{\text{Jac}}^{(G)}\}$  and  $\beta := \min\{\beta_F, \beta_G\}$ . This result parallels Lemma 1 of Song et al. [106], adapted here to the alternating min-max setting.

However, the optimization trajectory could, in principle, leave this region. To prevent this, we analyze the path length of AltGDA using Yang, Kiyavash, and He [124]’s Lyapunov potential function, rather than directly unrolling the iterates—which would be analytically cumbersome due to alternation:

**Definition 3.1** (Lyapunov Potential [124]). For a min-max objective function,  $\mathcal{L}(\theta, \phi)$ , we define the Lyapunov potential at time  $t$  as  $P_t = (\max_{\phi} \mathcal{L}(\theta_t, \phi) - \mathcal{L}(\theta^*, \phi^*)) + \lambda (\max_{\theta} \mathcal{L}(\theta, \phi_t) - \mathcal{L}(\theta_t, \phi_t))$ . (Note that the choice of  $\lambda$  will not affect our conclusions about overparameterization in this paper.)

**Lemma 3.2** (Theorem 3.2 in [124]). *Suppose the min-max objective function  $\mathcal{L}(\theta, \phi)$  is  $L_{\nabla\mathcal{L}}$ -smooth and satisfies the two-sided PL-condition with  $(\mu_{\theta}, \mu_{\phi})$ . Then if we run AltGDA with  $\eta_{\theta} = \frac{\mu_{\phi}^2}{18L_{\nabla\mathcal{L}}^3}$  and  $\eta_{\phi} = \frac{1}{L_{\nabla\mathcal{L}}}$ , then  $\|\theta_{t+1} - \theta_t\| + \|\phi_{t+1} - \phi_t\| \leq \sqrt{\alpha}c^{t/2}\sqrt{P_0}$  where constants  $\alpha$  and  $c \in (0, 1)$  depend only on  $L_{\nabla\mathcal{L}}, \mu_{\theta}, \mu_{\phi}$  and  $P_0$  is the Lyapunov potential at time  $t = 0$ . (Please refer to Remark E.5 for the exact expressions for  $\alpha$  and  $c$ .)*

By way of contradiction, let  $T$  denote the first iteration such that  $(\theta_T, \phi_T) \notin \mathcal{B}((\theta_0, \phi_0), R)$ . We will show that, with high probability, the AltGDA trajectory remains within this ball by proving that its total path length is strictly less than  $R$ .

Indeed, AltGDA path length satisfies:  $\ell(T) \triangleq \sum_{t=0}^{T-1} (\|\theta_{t+1} - \theta_t\| + \|\phi_{t+1} - \phi_t\|) \leq \frac{\sqrt{2\alpha_1}}{1-\sqrt{c}} \cdot \sqrt{P_0}$ . Therefore, it suffices to show that  $\sqrt{P_0} \leq R/2$  with high probability. The following lemma provides an upper bound on  $P_0$  in terms of the gradient norms:

**Lemma 3.3** (Upper Bound on Initial Potential  $P_0$ ). *Suppose the min-max objective  $\mathcal{L}(\theta, \phi)$  is  $L_{\mathcal{L}}$ -Lipschitz and satisfies a two-sided PL condition with constants  $(\mu_{\theta}, \mu_{\phi})$ . Then the initial Lyapunov potential  $P_0 \leq L_{\mathcal{L}} (C_1 \cdot \|\nabla_{\theta}\mathcal{L}(\theta_0, \phi_0)\| + C_2 \cdot \|\nabla_{\phi}\mathcal{L}(\theta_0, \phi_0)\|)$ , where  $C_1, C_2 = \Theta(L_{\mathcal{L}}/\mu_{\theta}^3)$ .*

It is clear that bounding  $P_0$  requires controlling the gradient norms at initialization, which—in our neural setting—requires bounding both the output norm and the spectral norm  $\sigma_{\max}$  of the Jacobian via the chain rule. Lemmas 3.4, G.2 and 3.7 provide these bounds under standard overparameterization and Lipschitz stability conditions. As a result, we obtain  $P_0 \leq \kappa R^2$  for some constant  $\kappa < 1$  determined by the network width. Thus, with sufficient overparameterization, the iterates remain confined within the well-conditioned region  $\mathcal{B}((\theta_0, \phi_0), R)$ .

Interestingly, this analysis not only ensures that the iterates stay within a region where the PL-condition holds, but also reveals a beneficial side effect: since the potential function captures a weighted average of Nash gaps and is monotonically decreasing, a small initial value of  $P_0$  implies that the initialization is already *mildly close* to equilibrium. Consequently, both convergence and geometric stability are maintained throughout training.

### 3.1 Input-Optimization Min-Max Games

Here, we consider the input-optimization game between two neural networks  $F_{\theta}$  and  $G_{\phi}$  in hidden bilinear objective with  $\ell_2$ -regularization defined as follows for a given payoff matrix,  $A$ :

$$\mathcal{L}(\theta, \phi) = F(\theta)^{\top} A G(\phi) + \frac{\varepsilon}{2} \|F(\theta)\|^2 - \frac{\varepsilon}{2} \|G(\phi)\|^2 \quad (3)$$

This game has been proposed by [114] and experimentally analyzed by [99]. Here,  $F_{\theta}$  and  $G_{\phi}$  are defined similar to Definition 2.3 as  $F(\theta) = W_2^{(F)}\psi(W_1^{(F)}\theta)$  and  $G(\phi) = W_2^{(G)}\psi(W_1^{(G)}\phi)$  but with parameters  $\theta, \phi$  as inputs and randomly initialized  $W_k^{(F)} \sim \mathcal{N}(0, \sigma_{k,F}^2), W_k^{(G)} \sim \mathcal{N}(0, \sigma_{k,G}^2)$ ,  $k \in \{1, 2\}$  along with differentiable activation function  $\psi$  (e.g. GeLU). Therefore, the partial derivatives w.r.t.  $\theta$  and  $\phi$  will be as follows:

$$\nabla_{\theta} f(\theta, \phi) = (\nabla_{\theta} F_{\theta})^{\top} A G(\phi) + \varepsilon (\nabla_{\theta} F_{\theta})^{\top} F(\theta)$$



$$\nabla_{\phi} f(\theta, \phi) = (\nabla_{\phi} G_{\phi})^{\top} A^{\top} F(\theta) - \varepsilon (\nabla_{\phi} G_{\phi})^{\top} G(\phi) \quad (4)$$

Using these and Lemma 3.3, we can now bound  $P_0$  as follows:

$$\begin{aligned} \implies P_0 &\leq \|F(\theta_0)\| \cdot (\varepsilon L_{\mathcal{L}} C_1 \sigma_{\max}(\nabla_{\theta} F_{\theta_0}) + L_{\mathcal{L}} C_2' (1 + \lambda) \sigma_{\max}(A) \sigma_{\max}(\nabla_{\phi} G_{\phi_0})) \\ &\quad + \|G(\phi_0)\| \cdot (L_{\mathcal{L}} C_1 \sigma_{\max}(A) \sigma_{\max}(\nabla_{\theta} F_{\theta_0}) + \varepsilon C_2' (1 + \lambda) \sigma_{\max}(\nabla_{\phi} G_{\phi_0})) \end{aligned} \quad (5)$$

Since we want to stay within the ball  $\mathcal{B}((\theta_0, \phi_0), R)$ , we can ensure  $P_0 = \kappa R^2$  by controlling each term in Equation (5) accordingly that ultimately yields Theorem 3.5. For this, we would additionally need to prove Lemma 3.4 as stated below. (Please see Appendix F for proof).

**Lemma 3.4.** *Consider a neural network  $F_{\theta} = F(\theta) = W_2^{(F)} \psi(W_1^{(F)} \theta)$  as defined above. Say  $\psi$  is the GeLU activation function,  $d_1^{(F)} \geq 256 \max\{d_0^{(F)}, d_2^{(F)}\}$  and  $\sigma_1^{(F)} = \mathcal{O}\left(\left(d_1^{(F)} \|\theta\|^2\right)^{-0.5}\right)$ .*

*Then, w.p.  $\geq 1 - e^{-\Omega(d_1^{(F)})}$ ,*

*(i) the singular values of the Jacobian  $\nabla_{\theta} F_{\theta}$  are bounded as*

$$\sigma_{\min}(\nabla_{\theta} F_{\theta}) = \Omega\left(\sigma_{1,F} \cdot \sigma_{2,F} \cdot d_1^{(F)}\right) \quad \text{and} \quad \sigma_{\max}(\nabla_{\theta} F_{\theta}) = \mathcal{O}\left(\sigma_{1,F} \cdot \sigma_{2,F} \cdot d_1^{(F)}\right) \quad (6)$$

*(ii)  $F(\theta)$  is  $\beta_F$ -smooth where  $\beta_F = \Theta\left(\sigma_{1,F}^2 \cdot \sigma_{2,F} \cdot (d_1^{(F)})^{3/2}\right)$ .*

**Theorem 3.5.** *Consider two neural networks  $F(\theta), G(\phi)$  as defined in Lemma 3.4 above. For the regularized hidden bilinear min-max objective  $\mathcal{L}(\theta, \phi)$  as defined in Equation 3 above, AltGDA reaches  $\varepsilon$ -saddle point w.p.  $\geq 1 - e^{-\Omega(d_1^{(F)})}$  if  $(\theta_0, \phi_0)$  and standard deviations  $\sigma_{k,F}$  and  $\sigma_{k,G}$ ,  $k \in \{1, 2\}$  are chosen such that  $\sigma_{k,F/G} = \Theta\left(\frac{\text{poly}(1/d_1)}{\sigma_{\max}(A)}\right)$ :*

To our knowledge, this is the first fine-grained result for overparametrized networks that establishes an  $O(\varepsilon)$ -approximate minimax solution for the hidden bilinear setting originally proposed by Vlatakis-Gkaragkounis, Flokas, and Piliouras [114].

### 3.2 Neural-Parameters Min-Max Games

Now we analyse the case of Neural-Parameters Min-Max Games as described in Section 2. In particular, when both players are two-layer neural networks, through Lemma 3.7, with high probability the Jacobians are non-singular for random Gaussian initializations which ensures that the  $\square$  games with such networks will satisfy 2-sided PL-condition with high probability. Consequently, given appropriate initialization conditions for the networks (Assumption 3.6, Equation (9)), just like in Section 3.1, we can show that AltGDA converges to the saddle point by ensuring  $P_0 = \kappa R^2$  via requiring both the networks to have at least cubic overparameterization (Theorem 3.8).

**Initialization Scheme 3.6** (Random Initialization). We consider the following initialization scheme for a two-layer neural network,  $F$ , as defined in Definition 2.3:

$$(W_1^{(F)})_0 \sim \mathcal{N}(0, \sigma_{1,F}^2 I) \quad (W_2^{(F)})_0 \sim \mathcal{N}(0, \sigma_{2,F}^2 I) \quad (7)$$

**Lemma 3.7** (Lemma 3 & Appendix E.1–E.4 in [106]). *Suppose that a two-layer neural network,  $F$ , as defined in Definition 2.3, satisfies Assumption 2.4 and  $\tau^{r_1} |\psi(a)| \leq |\psi(\tau a)| \leq \tau^{r_2} |\psi(a)|$ , respectively for all  $a$ ,  $0 < \tau < 1$ , and some constants  $r_1, r_2$ . Then w.h.p. the neural network*

*(i) Jacobian has following bounds on its singular values*

$$\sigma_{\min}(\nabla_{\theta} F_{\theta}) = \tilde{\Omega}\left(\sigma_{1,F}^{r_1} \sqrt{d_1^{(F)}}\right) \quad \text{and} \quad \sigma_{\max}(\nabla_{\theta} F_{\theta}) = \tilde{\mathcal{O}}\left(\sigma_{1,F}^{r_2} \sqrt{n \cdot d_1^{(F)}}\right) \quad (8)$$

*(ii) is  $\beta_F$ -smooth with  $\beta_F = \sqrt{2} \sigma_{\max}(X) (\dot{\psi}_{\max} + \ddot{\psi}_{\max} \chi_{\max})$  where  $\chi_{\max} = \sup_V \sigma_{\max}(V)$ .*

**Theorem 3.8** ( $\square$  Games with AltGDA). *Suppose there are two two-layer neural networks,  $h_{\theta}, g_{\phi}$  as defined in Definition 2.3 which satisfy Assumption 2.4 and  $\tau^{r_1} |\psi(a)| \leq |\psi(\tau a)| \leq \tau^{r_2} |\psi(a)|$ , respectively for all  $a$ ,  $0 < \tau < 1$ , and some constants  $r_1, r_2$ . Suppose the network parameters  $\theta_0$  and  $\phi_0$  are randomly initialized as in initialization Scheme 3.6 with  $(\sigma_{1,F}, \sigma_{2,F})$  and  $(\sigma_{1,G}, \sigma_{2,G})$ , respectively, which satisfy*

$$\sigma_{1,F} \cdot \sigma_{2,F} \lesssim \frac{1}{\sqrt{d_0^{(F)} d_1^{(F)}}} \quad \text{and} \quad \sigma_{1,G} \cdot \sigma_{2,G} \lesssim \frac{1}{\sqrt{d_0^{(G)} d_1^{(G)}}} \quad (9)$$

and suppose that the hidden layer widths  $d_1^{(F)}$  and  $d_1^{(G)}$  for the two networks  $F$  and  $G$  satisfy

$$d_1^{(F)} = \tilde{\Omega} \left( \mu_\theta^2 \frac{n^3}{d_0^{(F)}} \right) \quad \text{and} \quad d_1^{(G)} = \tilde{\Omega} \left( \mu_\phi^2 \frac{n^3}{d_0^{(G)}} \right) \quad (10)$$

where the datasets  $(\mathcal{D}_F, \mathcal{D}_G)$  for both the players are assumed to be of size  $n$ . Then  $\Pi$  game correspond to an  $(\mu_\theta, \mu_\phi)$ -HSCSC min-max objective as defined in Equation 1 satisfying Assumption 2.1 and AltGDA with appropriate fixed step-sizes  $\eta_\theta, \eta_\phi$  (see Lemma E.7) converges to the saddle point  $(\theta^*, \phi^*)$  exponentially fast with high probability.

We refer the reader to Appendix G for the proof of Theorem 3.8, and exact expressions for failure probabilities and various quantities stated in both Lemma 3.7 and Theorem 3.8

## 4 Conclusion & Future Directions

We provide the first convergence guarantees and overparameterization bounds for alternating gradient methods in input games and hidden (strongly) convex–concave neural games. Our analysis tightly links optimization trajectory control with spectral stability, ensuring convergence to near-equilibrium. If the reader would like to look beyond the technicalities around the non-asymptotic bounds, our proof techniques offer several insights for practitioners:

- **Interpretation of  $\sigma_{\min}$  and Exploration:** The smallest singular value of the network Jacobian,  $\sigma_{\min}$ , controls how well the model explores the strategy space. When  $\sigma_{\min} \approx 0$ , certain strategies remain unexplored, indicating convergence to spurious subspaces. Our analysis ties this directly to the degree of overparameterization.
- **Data Geometry and Regions of Attraction:** Our results show that overparameterized networks initialized with sufficiently diverse data are more likely to fall into regions where  $\sigma_{\min} > 0$ , ensuring stable convergence under AltGDA. While computing  $\sigma_{\min}$  per iteration is impractical, the connection offers design insights for data and architecture.

Table 1: Comparison between our paper and common practice

|                        | Our paper                            | In practice                                                                                       |
|------------------------|--------------------------------------|---------------------------------------------------------------------------------------------------|
| Type of Neural Network | 1-hidden-layer, fully-connected      | Typically deep networks, not necessarily fully-connected (e.g., residual or convolutional layers) |
| Training Algorithm     | AltGDA                               | Not necessarily AltGDA / mainly double-loop                                                       |
| Network Initialization | Gaussian (with variance constraints) | Similar (e.g., He, Xavier, or LeCun initializations)                                              |

Going beyond the neural networks and training regimes considered in this paper (see Table 1 for a summary) is an important future direction. Among these, the assumption on AltGDA is arguably the most benign. In non-convex/non-concave min-max optimization, stabilization is essential. In practice, double-loop methods (e.g., approximate best-response oracles) are often used for safety, while AltGDA serves as a more parallelizable and simpler single-loop alternative. Similarly, the Gaussian initialization is closely aligned with popular schemes like He or Xavier. The main gap lies in the architecture: practical models are often very deep with fixed-width layers. While recent work has begun to explore overparameterization in deep networks for minimization tasks, our paper focuses on a more analytically tractable setting – explicitly avoiding the NTK regime to provide a non-asymptotic analysis for 1-hidden-layer networks in a game-theoretic context. We view relaxing and extending these assumptions as a promising direction for future work.

Another natural next step is to understand how these techniques extend to non-differentiable activation functions (such as ReLU) or scale to multi-player and non-zero-sum settings – especially in structured environments like polyhedral games, which share connections with extensive-form games. For instance, exploring the analogy between two-sided PL-conditions (for two-player games) and hypomonotonicity in multi-agent operator theory may allow us to transfer and generalize some of the intuition and techniques from our current setting. We hope our work and these possible future directions open up rich and technically deep avenues for developing gradient-based methods tailored for structured, non-monotone multiplayer games. (See also Appendix I.)

## References

- [1] Jacob Abernethy, Kevin A Lai, and Andre Wibisono. “Last-iterate convergence rates for min-max optimization”. In: *arXiv preprint arXiv:1906.02027* (2019).
- [2] Sravanti Addepalli et al. “Scaling adversarial training to large perturbation bounds”. In: *European Conference on Computer Vision*. Springer. 2022, pp. 301–316.
- [3] Zeyuan Allen-Zhu, Yuanzhi Li, and Zhao Song. “A convergence theory for deep learning via over-parameterization”. In: *International conference on machine learning*. PMLR. 2019, pp. 242–252.
- [4] Dario Amodei et al. “Concrete problems in AI safety”. In: *arXiv preprint arXiv:1606.06565* (2016).
- [5] Ioannis Anagnostides and Tuomas Sandholm. “Convergence of  $\log(1/\epsilon)$  for Gradient-Based Algorithms in Zero-Sum Games without the Condition Number: A Smoothed Analysis”. In: *arXiv preprint arXiv:2410.21636* (2024).
- [6] Ioannis Anagnostides et al. “The Complexity of Symmetric Equilibria in Min-Max Optimization and Team Zero-Sum Games”. In: *arXiv preprint arXiv:2502.08519* (2025).
- [7] James P Bailey, Gauthier Gidel, and Georgios Piliouras. “Finite regret and cycles with fixed step-size via alternating gradient descent-ascent”. In: *Conference on Learning Theory*. PMLR. 2020, pp. 391–407.
- [8] Anas Barakat, Ilyas Fatkhullin, and Niao He. “Reinforcement learning with general utilities: Simpler variance reduction and large state-action space”. In: *International Conference on Machine Learning*. PMLR. 2023, pp. 1753–1800.
- [9] Aharon Ben-Tal and Marc Teboulle. “Hidden convexity in some nonconvex quadratically constrained quadratic programming”. In: *Mathematical Programming* 72.1 (1996), pp. 51–63.
- [10] Martino Bernasconi et al. “On the Role of Constraints in the Complexity of Min-Max Optimization”. In: *arXiv preprint arXiv:2411.03248* (2024).
- [11] Aditya Bhaskara et al. “Descent with Misaligned Gradients and Applications to Hidden Convexity”. In: *The Thirteenth International Conference on Learning Representations*.
- [12] Koushik Biswas et al. “SMU: smooth activation function for deep networks using smoothing maximum technique”. In: *arXiv preprint arXiv:2111.04682* (2021).
- [13] Simone Bombari, Mohammad Hossein Amani, and Marco Mondelli. “Memorization and optimization in deep neural networks with minimum over-parameterization”. In: *Advances in Neural Information Processing Systems* 35 (2022), pp. 7628–7640.
- [14] Andrew Brock, Jeff Donahue, and Karen Simonyan. “Large Scale GAN Training for High Fidelity Natural Image Synthesis”. In: *International Conference on Learning Representations*. 2019. URL: <https://openreview.net/forum?id=B1xsqj09Fm>.
- [15] Noam Brown and Tuomas Sandholm. “Solving imperfect-information games via discounted regret minimization”. In: *Proceedings of the AAAI Conference on Artificial Intelligence*. Vol. 33. 01. 2019, pp. 1829–1836.
- [16] Jonah Brown-Cohen, Geoffrey Irving, and Georgios Piliouras. “Scalable AI safety via doubly-efficient debate”. In: *arXiv preprint arXiv:2311.14125* (2023).
- [17] Sébastien Bubeck and Mark Sellke. “A universal law of robustness via isoperimetry”. In: *Advances in Neural Information Processing Systems* 34 (2021), pp. 28811–28822.
- [18] Qi Cai et al. “On the global convergence of imitation learning: A case for linear quadratic regulator”. In: *arXiv preprint arXiv:1901.03674* (2019).
- [19] Yang Cai et al. “Zero-sum polymatrix games: A generalization of minmax”. In: *Mathematics of Operations Research* 41.2 (2016), pp. 648–655.
- [20] Lesi Chen, Boyuan Yao, and Luo Luo. “Faster stochastic algorithms for minimax optimization under polyak- $\{L\}$  ojasiewicz condition”. In: *Advances in Neural Information Processing Systems* 35 (2022), pp. 13921–13932.
- [21] Robert S Chen et al. “Robust optimization for non-convex objectives”. In: *Advances in Neural Information Processing Systems* 30 (2017).
- [22] Xi Chen and Xiaotie Deng. “3-Nash is PPAD-complete”. In: *Electronic Colloquium on Computational Complexity*. Vol. 134. Citeseer. 2005, pp. 2–29.
- [23] Xi Chen, Xiaotie Deng, and Shang-Hua Teng. “Settling the complexity of computing two-player Nash equilibria”. In: *Journal of the ACM (JACM)* 56.3 (2009), pp. 1–57.

- [24] Xin Chen et al. “Efficient algorithms for a class of stochastic hidden convex optimization and its applications in network revenue management”. In: *Operations Research* (2024).
- [25] Zhang Chen et al. “Over-parameterization and Adversarial Robustness in Neural Networks: An Overview and Empirical Analysis”. In: *arXiv preprint arXiv:2406.10090* (2024).
- [26] Zixiang Chen, Dongruo Zhou, and Quanquan Gu. “Almost optimal algorithms for two-player markov games with linear function approximation”. In: *arXiv preprint arXiv:2102.07404* 1.2 (2021), p. 3.
- [27] Lenaïc Chizat, Edouard Oyallon, and Francis Bach. “On lazy training in differentiable programming”. In: *Advances in neural information processing systems* 32 (2019).
- [28] Jacob W Crandall et al. “Cooperating with machines”. In: *Nature communications* 9.1 (2018), p. 233.
- [29] Ryan D’Orazio et al. “Solving hidden monotone variational inequalities with surrogate losses”. In: *arXiv preprint arXiv:2411.05228* (2024).
- [30] Ryan D’Orazio et al. “Solving hidden monotone variational inequalities with surrogate losses”. In: *The Thirteenth International Conference on Learning Representations*. 2025. URL: <https://openreview.net/forum?id=4ZX2a30KEV>.
- [31] Constantinos Daskalakis. “Non-concave games: A challenge for game theory’s next 100 years”. In: *Cowles Preprints* (2022).
- [32] Constantinos Daskalakis, Paul W Goldberg, and Christos H Papadimitriou. “The complexity of computing a Nash equilibrium”. In: *Communications of the ACM* 52.2 (2009), pp. 89–97.
- [33] Constantinos Daskalakis and Ioannis Panageas. “The limit points of (optimistic) gradient descent in min-max optimization”. In: *Advances in neural information processing systems* 31 (2018).
- [34] Constantinos Daskalakis, Stratis Skoulakis, and Manolis Zampetakis. “The complexity of constrained min-max optimization”. In: *Proceedings of the 53rd Annual ACM SIGACT Symposium on Theory of Computing*. 2021, pp. 1466–1478.
- [35] Constantinos Daskalakis et al. “Training gans with optimism”. In: *arXiv preprint arXiv:1711.00141* (2017).
- [36] VF Dem’yanov and AB Pevnyi. “Some estimates in minimax problems”. In: *Cybernetics* 8.1 (1972), pp. 116–123.
- [37] Yihe Dong, Jean-Baptiste Cordonnier, and Andreas Loukas. “Attention is not all you need: pure attention loses rank doubly exponentially with depth”. In: *Proceedings of the 38th International Conference on Machine Learning*. Ed. by Marina Meila and Tong Zhang. Vol. 139. Proceedings of Machine Learning Research. PMLR, 18–24 Jul 2021, pp. 2793–2803. URL: <https://proceedings.mlr.press/v139/dong21a.html>.
- [38] Simon Du et al. “Gradient descent finds global minima of deep neural networks”. In: *International conference on machine learning*. PMLR. 2019, pp. 1675–1685.
- [39] Charles Dugas et al. “Incorporating second-order functional knowledge for better option pricing”. In: *Advances in neural information processing systems* 13 (2000).
- [40] Stefan Elfving, Eiji Uchibe, and Kenji Doya. “Sigmoid-weighted linear units for neural network function approximation in reinforcement learning”. In: *Neural networks* 107 (2018), pp. 3–11.
- [41] Ilyas Fatkhullin, Niao He, and Yifan Hu. “Stochastic optimization under hidden convexity”. In: *arXiv preprint arXiv:2401.00108* (2023).
- [42] Qi Feng and J George Shanthikumar. “Supply and demand functions in inventory models”. In: *Operations Research* 66.1 (2018), pp. 77–91.
- [43] Ruili Feng et al. “Rank Diminishing in Deep Neural Networks”. In: *Advances in Neural Information Processing Systems*. Ed. by S. Koyejo et al. Vol. 35. Curran Associates, Inc., 2022, pp. 33054–33065. URL: [https://proceedings.neurips.cc/paper\\_files/paper/2022/file/d5cd70b708f726737e2ebace18c3f71b-Paper-Conference.pdf](https://proceedings.neurips.cc/paper_files/paper/2022/file/d5cd70b708f726737e2ebace18c3f71b-Paper-Conference.pdf).
- [44] Yaroslav Ganin et al. “Domain-adversarial training of neural networks”. In: *Journal of machine learning research* 17.59 (2016), pp. 1–35.
- [45] Ruiqi Gao et al. “Convergence of adversarial training in overparametrized neural networks”. In: *Advances in Neural Information Processing Systems* 32 (2019).

- [46] Angeliki Giannou, Emmanouil Vasileios Vlatakis-Gkaragkounis, and Panayotis Mertikopoulos. “Survival of the strictest: Stable and unstable equilibria under regularized learning with partial information”. In: *Conference on Learning Theory*. PMLR. 2021, pp. 2147–2148.
- [47] Angeliki Giannou, Emmanouil Vasileios Vlatakis-Gkaragkounis, and Panayotis Mertikopoulos. “On the rate of convergence of regularized learning in games: From bandits and uncertainty to optimism and beyond”. In: *Advances in Neural Information Processing Systems 34* (2021), pp. 22655–22666.
- [48] Gauthier Gidel et al. “A limited-capacity minimax theorem for non-convex games or: How i learned to stop worrying about mixed-nash and love neural nets”. In: *International Conference on Artificial Intelligence and Statistics*. PMLR. 2021, pp. 2548–2556.
- [49] Gauthier Gidel et al. “A variational inequality perspective on generative adversarial networks”. In: *arXiv preprint arXiv:1802.10551* (2018).
- [50] Gauthier Gidel et al. “Negative momentum for improved game dynamics”. In: *The 22nd International Conference on Artificial Intelligence and Statistics*. PMLR. 2019, pp. 1802–1811.
- [51] Ian J Goodfellow et al. “Generative adversarial nets”. In: *Advances in neural information processing systems 27* (2014).
- [52] Sergiu Hart and Andreu Mas-Colell. “Stochastic uncoupled dynamics and Nash equilibrium”. In: *Games and economic behavior 57.2* (2006), pp. 286–303.
- [53] Sergiu Hart and Andreu Mas-Colell. “Uncoupled dynamics do not lead to Nash equilibrium”. In: *American Economic Review 93.5* (2003), pp. 1830–1836.
- [54] Elad Hazan et al. “Provably Efficient Maximum Entropy Exploration”. In: *International Conference on Machine Learning (ICML)*. 2019.
- [55] Dan Hendrycks and Kevin Gimpel. “Gaussian error linear units (gelus)”. In: *arXiv preprint arXiv:1606.08415* (2016).
- [56] Geoffrey Irving, Paul Christiano, and Dario Amodei. “AI safety via debate”. In: *arXiv preprint arXiv:1805.00899* (2018).
- [57] Arthur Jacot, Franck Gabriel, and Clément Hongler. “Neural tangent kernel: Convergence and generalization in neural networks”. In: *Advances in neural information processing systems 31* (2018).
- [58] Chi Jin, Qinghua Liu, and Tiancheng Yu. “The power of exploiter: Provable multi-agent rl in large state spaces”. In: *International Conference on Machine Learning*. PMLR. 2022, pp. 10251–10279.
- [59] Fivos Kalogiannis, Jingming Yan, and Ioannis Panageas. “Learning Equilibria in Adversarial Team Markov Games: A Nonconvex-Hidden-Concave Min-Max Optimization Problem”. In: *The Thirty-eighth Annual Conference on Neural Information Processing Systems*.
- [60] Fivos Kalogiannis et al. “Solving Zero-Sum Convex Markov Games”. In: *Proceedings of the 42nd International Conference on Machine Learning (ICML)*. Poster presentation. PMLR, 2025.
- [61] Tero Karras et al. “Progressive Growing of GANs for Improved Quality, Stability, and Variation”. In: *International Conference on Learning Representations*. 2018. URL: <https://openreview.net/forum?id=Hk99zCeAb>.
- [62] Seth Karten, Andy Luu Nguyen, and Chi Jin. “PokéChamp: an Expert-level Minimax Language Agent”. In: *Forty-second International Conference on Machine Learning*. 2025. URL: <https://openreview.net/forum?id=SnZ7SKykHh>.
- [63] Ivan Kobyzev, Simon JD Prince, and Marcus A Brubaker. “Normalizing flows: An introduction and review of current methods”. In: *IEEE transactions on pattern analysis and machine intelligence 43.11* (2020), pp. 3964–3979.
- [64] Galina M Korpelevich. “The extragradient method for finding saddle points and other problems”. In: *Matecon 12* (1976), pp. 747–756.
- [65] Ilya Kuruzov et al. “Gradient-Type Methods For Decentralized Optimization Problems With Polyak- $\{L\}$  ojasiewicz Condition Over Time-Varying Networks”. In: *arXiv preprint arXiv:2210.03810* (2022).
- [66] Jaewook Lee, Hanseul Cho, and Chulhee Yun. “Fundamental benefit of alternating updates in minimax optimization”. In: *arXiv preprint arXiv:2402.10475* (2024).

- [67] Chris Junchi Li et al. “Learning two-player markov games: Neural function approximation and correlated equilibrium”. In: *Advances in Neural Information Processing Systems* 35 (2022), pp. 33262–33274.
- [68] Qihang Lin et al. “Solving weakly-convex-weakly-concave saddle-point problems as successive strongly monotone variational inequalities”. In: *arXiv* 2018 (2018).
- [69] Chaoyue Liu, Libin Zhu, and Mikhail Belkin. “Loss landscapes and optimization in overparameterized non-linear systems and neural networks”. In: *Applied and Computational Harmonic Analysis* 59 (2022), pp. 85–116.
- [70] Chaoyue Liu, Libin Zhu, and Misha Belkin. “On the linearity of large non-linear models: when and why the tangent kernel is constant”. In: *Advances in Neural Information Processing Systems* 33 (2020), pp. 15954–15964.
- [71] Zehua Liu et al. “Convergence Analysis of Randomized SGDA under NC-PL Condition for Stochastic Minimax Optimization Problems”. In: *arXiv preprint arXiv:2307.13880* (2023).
- [72] Roi Livni, Shai Shalev-Shwartz, and Ohad Shamir. “On the computational efficiency of training neural networks”. In: *Advances in neural information processing systems* 27 (2014).
- [73] Stanislaw Lojasiewicz. “Une propriété topologique des sous-ensembles analytiques réels”. In: *Les équations aux dérivées partielles* 117.87-89 (1963).
- [74] B. Martinet. “Régularisation d’inéquations variationnelles par approximations successives”. In: *ESAIM: Mathematical Modelling and Numerical Analysis - Modélisation Mathématique et Analyse Numérique* (1970).
- [75] Panayotis Mertikopoulos, Christos Papadimitriou, and Georgios Piliouras. “Cycles in adversarial regularized learning”. In: *Proceedings of the twenty-ninth annual ACM-SIAM symposium on discrete algorithms*. SIAM. 2018, pp. 2703–2717.
- [76] Lars Mescheder, Sebastian Nowozin, and Andreas Geiger. “The numerics of gans”. In: *Advances in neural information processing systems* 30 (2017).
- [77] Paul Michel, Tatsunori Hashimoto, and Graham Neubig. “Modeling the Second Player in Distributionally Robust Optimization”. In: *International Conference on Learning Representations*. 2021. URL: <https://openreview.net/forum?id=ZDnzZrTqU9N>.
- [78] Jason Milionis et al. “An impossibility theorem in game dynamics”. In: *Proceedings of the National Academy of Sciences* 120.41 (2023), e2305349120.
- [79] Andjela Mladenovic et al. “Generalized natural gradient flows in hidden convex-concave games and gans”. In: *International Conference on Learning Representations*. 2021.
- [80] John F Nash. “Non-cooperative games”. In: *The Foundations of Price Theory Vol 4*. Routledge, 2024, pp. 329–340.
- [81] Yurii Nesterov and Boris T Polyak. “Cubic regularization of Newton method and its global performance”. In: *Mathematical programming* 108.1 (2006), pp. 177–205.
- [82] Hukukane Nikaidô and Kazuo Isoda. “Note on non-cooperative convex games”. In: (1955).
- [83] *Nobel Symposium: One Hundred Years of Game Theory*. Stockholm, Sweden. Organized by Jorgen Weibull, Roger Myerson, Yukio Koriyama, Tommy Andersson, and Mark Voorneveld. Dec. 2021.
- [84] Maher Nouiehed et al. “Solving a class of non-convex min-max games using iterative first order methods”. In: *Advances in Neural Information Processing Systems* 32 (2019).
- [85] Samet Oymak and Mahdi Soltanolkotabi. “Overparameterized nonlinear learning: Gradient descent takes the shortest path?” In: *International Conference on Machine Learning*. PMLR. 2019, pp. 4951–4960.
- [86] Samet Oymak and Mahdi Soltanolkotabi. “Toward moderate overparameterization: Global convergence guarantees for training shallow neural networks”. In: *IEEE Journal on Selected Areas in Information Theory* 1.1 (2020), pp. 84–105.
- [87] Christos H Papadimitriou, Emmanouil-Vasileios Vlatakis-Gkaragkounis, and Manolis Zampetakis. “The computational complexity of multi-player concave games and Kakutani fixed points”. In: *arXiv preprint arXiv:2207.07557* (2022).
- [88] Alan Le Pham et al. “The Effect of Model Size on Worst-Group Generalization”. In: *NeurIPS 2021 Workshop on Distribution Shifts: Connecting Methods and Applications*. 2021. URL: <https://openreview.net/forum?id=H8EF1LhFeqo>.
- [89] Lerrel Pinto et al. “Robust adversarial reinforcement learning”. In: *International conference on machine learning*. PMLR. 2017, pp. 2817–2826.

- [90] Boris Teodorovich Polyak. “Gradient methods for minimizing functionals”. In: *Zhurnal vychislitel’noi matematiki i matematicheskoi fiziki* 3.4 (1963), pp. 643–653.
- [91] Leonid Denisovich Popov. “A modification of the Arrow-Hurwitz method of search for saddle points”. In: *Mat. Zametki* 28.5 (1980), pp. 777–784.
- [92] Qi Qian et al. “Robust optimization over multiple domains”. In: *Proceedings of the AAAI Conference on Artificial Intelligence*. Vol. 33. 01. 2019, pp. 4739–4746.
- [93] R. Tyrrell Rockafellar. “Monotone operators and the proximal point algorithm”. In: *SIAM Journal on Control and Optimization* 14.5 (1976), pp. 877–898.
- [94] J Ben Rosen. “Existence and uniqueness of equilibrium points for concave n-person games”. In: *Econometrica: Journal of the Econometric Society* (1965), pp. 520–534.
- [95] Mark Rudelson and Roman Vershynin. “Smallest singular value of a random rectangular matrix”. In: *Communications on Pure and Applied Mathematics: A Journal Issued by the Courant Institute of Mathematical Sciences* 62.12 (2009), pp. 1707–1739.
- [96] Stuart Russell, Daniel Dewey, and Max Tegmark. “Research priorities for robust and beneficial artificial intelligence”. In: *AI magazine* 36.4 (2015), pp. 105–114.
- [97] Itay Safran and Ohad Shamir. “Depth-width tradeoffs in approximating natural functions with neural networks”. In: *International conference on machine learning*. PMLR. 2017, pp. 2979–2987.
- [98] Itay Safran and Ohad Shamir. “On the quality of the initial basin in overspecified neural networks”. In: *International Conference on Machine Learning*. PMLR. 2016, pp. 774–782.
- [99] Iosif Sakos et al. “Exploiting hidden structures in non-convex games for convergence to Nash equilibrium”. In: *Advances in Neural Information Processing Systems* 36 (2023), pp. 66979–67006.
- [100] Axel Sauer, Katja Schwarz, and Andreas Geiger. “Stylegan-xl: Scaling stylegan to large diverse datasets”. In: *ACM SIGGRAPH 2022 conference proceedings*. 2022, pp. 1–10.
- [101] Hanie Sedghi, Vineet Gupta, and Philip M Long. “The singular values of convolutional layers”. In: *arXiv preprint arXiv:1805.10408* (2018).
- [102] Shai Shalev-Shwartz, Shaked Shammah, and Amnon Shashua. “Safe, multi-agent, reinforcement learning for autonomous driving”. In: *arXiv preprint arXiv:1610.03295* (2016).
- [103] David Silver et al. “Mastering the game of go without human knowledge”. In: *nature* 550.7676 (2017), pp. 354–359.
- [104] Rachael Hwee Ling Sim et al. “Collaborative machine learning with incentive-aware model rewards”. In: *International conference on machine learning*. PMLR. 2020, pp. 8927–8936.
- [105] Aman Sinha, Hongseok Namkoong, and John C Duchi. “Certifiable Distributional Robustness with Principled Adversarial Training. CoRR, abs/1710.10571”. In: *arXiv preprint arXiv:1710.10571* (2017).
- [106] Chaehwan Song et al. “Subquadratic overparameterization for shallow neural networks”. In: *Advances in Neural Information Processing Systems* 34 (2021), pp. 11247–11259.
- [107] Ronald J Stern and Henry Wolkowicz. “Indefinite trust region subproblems and nonsymmetric eigenvalue perturbations”. In: *SIAM Journal on Optimization* 5.2 (1995), pp. 286–313.
- [108] Richard S Sutton, Csaba Szepesvári, and Hamid Reza Maei. “A convergent  $O(n)$  algorithm for off-policy temporal-difference learning with linear function approximation”. In: *Advances in neural information processing systems* 21.21 (2008), pp. 1609–1616.
- [109] Kiran K Thekumparampil et al. “Efficient algorithms for smooth minimax optimization”. In: *Advances in neural information processing systems* 32 (2019).
- [110] Roman Vershynin. *High-dimensional probability: An introduction with applications in data science*. Vol. 47. Cambridge university press, 2018.
- [111] Roman Vershynin. “Spectral norm of products of random and deterministic matrices”. In: *Probability theory and related fields* 150.3 (2011), pp. 471–509.
- [112] Oriol Vinyals et al. “Grandmaster level in StarCraft II using multi-agent reinforcement learning”. In: *nature* 575.7782 (2019), pp. 350–354.
- [113] Emmanouil-Vasileios Vlatakis-Gkaragkounis, Lampros Flokas, and Georgios Piliouras. “Chaos persists in large-scale multi-agent learning despite adaptive learning rates”. In: *arXiv preprint arXiv:2306.01032* (2023).

- [114] Emmanouil-Vasileios Vlatakis-Gkaragkounis, Lampros Flokas, and Georgios Piliouras. “Poincaré recurrence, cycles and spurious equilibria in gradient-descent-ascent for non-convex non-concave zero-sum games”. In: *Advances in Neural Information Processing Systems* 32 (2019).
- [115] Emmanouil-Vasileios Vlatakis-Gkaragkounis, Lampros Flokas, and Georgios Piliouras. “Solving min-max optimization with hidden structure via gradient descent ascent”. In: *Advances in Neural Information Processing Systems* 34 (2021), pp. 2373–2386.
- [116] Emmanouil-Vasileios Vlatakis-Gkaragkounis et al. “No-regret learning and mixed nash equilibria: They do not mix”. In: *Advances in Neural Information Processing Systems* 33 (2020), pp. 1380–1391.
- [117] Jingkang Wang et al. “Adversarial attack generation empowered by min-max optimization”. In: *Advances in Neural Information Processing Systems* 34 (2021), pp. 16020–16033.
- [118] Ruosong Wang, Dean P Foster, and Sham M Kakade. “What are the statistical limits of offline RL with linear function approximation?” In: *arXiv preprint arXiv:2010.11895* (2020).
- [119] Yifei Wang, Jonathan Lacotte, and Mert Pilanci. “The hidden convex optimization landscape of regularized two-layer relu networks: an exact characterization of optimal solutions”. In: *International Conference on Learning Representations*. 2021.
- [120] Chen-Yu Wei et al. “Linear last-iterate convergence in constrained saddle-point optimization”. In: *arXiv preprint arXiv:2006.09517* (2020).
- [121] Qiaomin Xie et al. “Learning zero-sum simultaneous-move markov games using function approximation and correlated equilibrium”. In: *Conference on learning theory*. PMLR. 2020, pp. 3674–3682.
- [122] Zi Xu et al. “Zeroth-Order Alternating Gradient Descent Ascent Algorithms for A Class of Nonconvex-Nonconcave Minimax Problems”. In: *Journal of Machine Learning Research* 24.313 (2023), pp. 1–25. URL: <http://jmlr.org/papers/v24/22-1518.html>.
- [123] Songkai Xue and Yuekai Sun. “Distributionally Robust Performative Prediction”. In: *Advances in Neural Information Processing Systems* 38 (2024).
- [124] Junchi Yang, Negar Kiyavash, and Niao He. “Global convergence and variance reduction for a class of nonconvex-nonconcave minimax problems”. In: *Advances in Neural Information Processing Systems* 33 (2020), pp. 1153–1165.
- [125] Junchi Yang et al. “Faster single-loop algorithms for minimax optimization without strong concavity”. In: *International Conference on Artificial Intelligence and Statistics*. PMLR. 2022, pp. 5485–5517.
- [126] Donghao Ying et al. “Policy-based primal-dual methods for convex constrained Markov decision processes”. In: *Proceedings of the AAAI Conference on Artificial Intelligence* 37 (2023), pp. 10963–10971.
- [127] Angela Yuan et al. “Optimal extragradient-based algorithms for stochastic variational inequalities with separable structure”. In: *Advances in Neural Information Processing Systems* 36 (2023), pp. 33338–33351.
- [128] Guodong Zhang et al. “Near-optimal local convergence of alternating gradient descent-ascent for minimax optimization”. In: *International Conference on Artificial Intelligence and Statistics*. PMLR. 2022, pp. 7659–7679.
- [129] Junyu Zhang et al. “Variational policy gradient method for reinforcement learning with general utilities”. In: *Advances in Neural Information Processing Systems* 33 (2020), pp. 4572–4583.
- [130] Kaiqing Zhang, Zhuoran Yang, and Tamer Başar. “Multi-agent reinforcement learning: A selective overview of theories and algorithms”. In: *Handbook of reinforcement learning and control* (2021), pp. 321–384.
- [131] Siqi Zhang and Niao He. “On the convergence rate of stochastic mirror descent for nonsmooth nonconvex optimization”. In: *arXiv preprint arXiv:1806.04781* (2018).
- [132] Yi Zhang et al. “Over-parameterized adversarial training: An analysis overcoming the curse of dimensionality”. In: *Advances in Neural Information Processing Systems* 33 (2020), pp. 679–688.



## NeurIPS Paper Checklist

### 1. Claims

Question: Do the main claims made in the abstract and introduction accurately reflect the paper's contributions and scope?

Answer: [Yes]

Justification: *The paper's main claims, as stated in the abstract and introduction, accurately reflect the technical contributions and scope of the work. In particular, the abstract highlights the development of convergence guarantees for large-scale neural min-max games, while the introduction motivates the focus on hidden convex-concave structures, separable objectives, and data-dependent mappings. These themes are consistently developed throughout the paper, culminating in formal theorems and empirical examples that substantiate the claims.*

Guidelines:

- The answer NA means that the abstract and introduction do not include the claims made in the paper.
- The abstract and/or introduction should clearly state the claims made, including the contributions made in the paper and important assumptions and limitations. A No or NA answer to this question will not be perceived well by the reviewers.
- The claims made should match theoretical and experimental results, and reflect how much the results can be expected to generalize to other settings.
- It is fine to include aspirational goals as motivation as long as it is clear that these goals are not attained by the paper.

### 2. Limitations

Question: Does the paper discuss the limitations of the work performed by the authors?

Answer: [Yes]

Justification: *Any assumption used has been discussed together with the description of the underlying model.*

Guidelines:

- The answer NA means that the paper has no limitation while the answer No means that the paper has limitations, but those are not discussed in the paper.
- The authors are encouraged to create a separate "Limitations" section in their paper.
- The paper should point out any strong assumptions and how robust the results are to violations of these assumptions (e.g., independence assumptions, noiseless settings, model well-specification, asymptotic approximations only holding locally). The authors should reflect on how these assumptions might be violated in practice and what the implications would be.
- The authors should reflect on the scope of the claims made, e.g., if the approach was only tested on a few datasets or with a few runs. In general, empirical results often depend on implicit assumptions, which should be articulated.
- The authors should reflect on the factors that influence the performance of the approach. For example, a facial recognition algorithm may perform poorly when image resolution is low or images are taken in low lighting. Or a speech-to-text system might not be used reliably to provide closed captions for online lectures because it fails to handle technical jargon.
- The authors should discuss the computational efficiency of the proposed algorithms and how they scale with dataset size.
- If applicable, the authors should discuss possible limitations of their approach to address problems of privacy and fairness.
- While the authors might fear that complete honesty about limitations might be used by reviewers as grounds for rejection, a worse outcome might be that reviewers discover limitations that aren't acknowledged in the paper. The authors should use their best judgment and recognize that individual actions in favor of transparency play an important role in developing norms that preserve the integrity of the community. Reviewers will be specifically instructed to not penalize honesty concerning limitations.

### 3. Theory assumptions and proofs

Question: For each theoretical result, does the paper provide the full set of assumptions and a complete (and correct) proof?

Answer: [Yes]

Justification: *All necessary proofs are included.*

Guidelines:

- The answer NA means that the paper does not include theoretical results.
- All the theorems, formulas, and proofs in the paper should be numbered and cross-referenced.
- All assumptions should be clearly stated or referenced in the statement of any theorems.
- The proofs can either appear in the main paper or the supplemental material, but if they appear in the supplemental material, the authors are encouraged to provide a short proof sketch to provide intuition.
- Inversely, any informal proof provided in the core of the paper should be complemented by formal proofs provided in appendix or supplemental material.
- Theorems and Lemmas that the proof relies upon should be properly referenced.

### 4. Experimental result reproducibility

Question: Does the paper fully disclose all the information needed to reproduce the main experimental results of the paper to the extent that it affects the main claims and/or conclusions of the paper (regardless of whether the code and data are provided or not)?

Answer: [NA]

Justification: *The paper does not include experiments.*

Guidelines:

- The answer NA means that the paper does not include experiments.
- If the paper includes experiments, a No answer to this question will not be perceived well by the reviewers: Making the paper reproducible is important, regardless of whether the code and data are provided or not.
- If the contribution is a dataset and/or model, the authors should describe the steps taken to make their results reproducible or verifiable.
- Depending on the contribution, reproducibility can be accomplished in various ways. For example, if the contribution is a novel architecture, describing the architecture fully might suffice, or if the contribution is a specific model and empirical evaluation, it may be necessary to either make it possible for others to replicate the model with the same dataset, or provide access to the model. In general, releasing code and data is often one good way to accomplish this, but reproducibility can also be provided via detailed instructions for how to replicate the results, access to a hosted model (e.g., in the case of a large language model), releasing of a model checkpoint, or other means that are appropriate to the research performed.
- While NeurIPS does not require releasing code, the conference does require all submissions to provide some reasonable avenue for reproducibility, which may depend on the nature of the contribution. For example
  - (a) If the contribution is primarily a new algorithm, the paper should make it clear how to reproduce that algorithm.
  - (b) If the contribution is primarily a new model architecture, the paper should describe the architecture clearly and fully.
  - (c) If the contribution is a new model (e.g., a large language model), then there should either be a way to access this model for reproducing the results or a way to reproduce the model (e.g., with an open-source dataset or instructions for how to construct the dataset).
  - (d) We recognize that reproducibility may be tricky in some cases, in which case authors are welcome to describe the particular way they provide for reproducibility. In the case of closed-source models, it may be that access to the model is limited in some way (e.g., to registered users), but it should be possible for other researchers to have some path to reproducing or verifying the results.

## 5. Open access to data and code

Question: Does the paper provide open access to the data and code, with sufficient instructions to faithfully reproduce the main experimental results, as described in supplemental material?

Answer: [NA]

Justification: *The paper does not include experiments requiring code.*

Guidelines:

- The answer NA means that paper does not include experiments requiring code.
- Please see the NeurIPS code and data submission guidelines (<https://nips.cc/public/guides/CodeSubmissionPolicy>) for more details.
- While we encourage the release of code and data, we understand that this might not be possible, so “No” is an acceptable answer. Papers cannot be rejected simply for not including code, unless this is central to the contribution (e.g., for a new open-source benchmark).
- The instructions should contain the exact command and environment needed to run to reproduce the results. See the NeurIPS code and data submission guidelines (<https://nips.cc/public/guides/CodeSubmissionPolicy>) for more details.
- The authors should provide instructions on data access and preparation, including how to access the raw data, preprocessed data, intermediate data, and generated data, etc.
- The authors should provide scripts to reproduce all experimental results for the new proposed method and baselines. If only a subset of experiments are reproducible, they should state which ones are omitted from the script and why.
- At submission time, to preserve anonymity, the authors should release anonymized versions (if applicable).
- Providing as much information as possible in supplemental material (appended to the paper) is recommended, but including URLs to data and code is permitted.

## 6. Experimental setting/details

Question: Does the paper specify all the training and test details (e.g., data splits, hyper-parameters, how they were chosen, type of optimizer, etc.) necessary to understand the results?

Answer: [NA]

Justification: *The paper does not include experiments.*

Guidelines:

- The answer NA means that the paper does not include experiments.
- The experimental setting should be presented in the core of the paper to a level of detail that is necessary to appreciate the results and make sense of them.
- The full details can be provided either with the code, in appendix, or as supplemental material.

## 7. Experiment statistical significance

Question: Does the paper report error bars suitably and correctly defined or other appropriate information about the statistical significance of the experiments?

Answer: [NA]

Justification: *The paper does not include experiments.*

Guidelines:

- The answer NA means that the paper does not include experiments.
- The authors should answer "Yes" if the results are accompanied by error bars, confidence intervals, or statistical significance tests, at least for the experiments that support the main claims of the paper.
- The factors of variability that the error bars are capturing should be clearly stated (for example, train/test split, initialization, random drawing of some parameter, or overall run with given experimental conditions).

- The method for calculating the error bars should be explained (closed form formula, call to a library function, bootstrap, etc.)
- The assumptions made should be given (e.g., Normally distributed errors).
- It should be clear whether the error bar is the standard deviation or the standard error of the mean.
- It is OK to report 1-sigma error bars, but one should state it. The authors should preferably report a 2-sigma error bar than state that they have a 96% CI, if the hypothesis of Normality of errors is not verified.
- For asymmetric distributions, the authors should be careful not to show in tables or figures symmetric error bars that would yield results that are out of range (e.g. negative error rates).
- If error bars are reported in tables or plots, The authors should explain in the text how they were calculated and reference the corresponding figures or tables in the text.

#### 8. Experiments compute resources

Question: For each experiment, does the paper provide sufficient information on the computer resources (type of compute workers, memory, time of execution) needed to reproduce the experiments?

Answer: [NA]

Justification: *The paper does not include experiments.*

Guidelines:

- The answer NA means that the paper does not include experiments.
- The paper should indicate the type of compute workers CPU or GPU, internal cluster, or cloud provider, including relevant memory and storage.
- The paper should provide the amount of compute required for each of the individual experimental runs as well as estimate the total compute.
- The paper should disclose whether the full research project required more compute than the experiments reported in the paper (e.g., preliminary or failed experiments that didn't make it into the paper).

#### 9. Code of ethics

Question: Does the research conducted in the paper conform, in every respect, with the NeurIPS Code of Ethics <https://neurips.cc/public/EthicsGuidelines?>

Answer: [Yes]

Justification: *NeurIPS Code of Ethics has been preserved*

Guidelines:

- The answer NA means that the authors have not reviewed the NeurIPS Code of Ethics.
- If the authors answer No, they should explain the special circumstances that require a deviation from the Code of Ethics.
- The authors should make sure to preserve anonymity (e.g., if there is a special consideration due to laws or regulations in their jurisdiction).

#### 10. Broader impacts

Question: Does the paper discuss both potential positive societal impacts and negative societal impacts of the work performed?

Answer: [Yes]

Justification: *The paper includes discussion about the societal impact of the performed work*

Guidelines:

- The answer NA means that there is no societal impact of the work performed.
- If the authors answer NA or No, they should explain why their work has no societal impact or why the paper does not address societal impact.
- Examples of negative societal impacts include potential malicious or unintended uses (e.g., disinformation, generating fake profiles, surveillance), fairness considerations (e.g., deployment of technologies that could make decisions that unfairly impact specific groups), privacy considerations, and security considerations.

- The conference expects that many papers will be foundational research and not tied to particular applications, let alone deployments. However, if there is a direct path to any negative applications, the authors should point it out. For example, it is legitimate to point out that an improvement in the quality of generative models could be used to generate deepfakes for disinformation. On the other hand, it is not needed to point out that a generic algorithm for optimizing neural networks could enable people to train models that generate Deepfakes faster.
- The authors should consider possible harms that could arise when the technology is being used as intended and functioning correctly, harms that could arise when the technology is being used as intended but gives incorrect results, and harms following from (intentional or unintentional) misuse of the technology.
- If there are negative societal impacts, the authors could also discuss possible mitigation strategies (e.g., gated release of models, providing defenses in addition to attacks, mechanisms for monitoring misuse, mechanisms to monitor how a system learns from feedback over time, improving the efficiency and accessibility of ML).

## 11. Safeguards

Question: Does the paper describe safeguards that have been put in place for responsible release of data or models that have a high risk for misuse (e.g., pretrained language models, image generators, or scraped datasets)?

Answer: [NA]

Justification: *The paper poses no such risks.*

Guidelines:

- The answer NA means that the paper poses no such risks.
- Released models that have a high risk for misuse or dual-use should be released with necessary safeguards to allow for controlled use of the model, for example by requiring that users adhere to usage guidelines or restrictions to access the model or implementing safety filters.
- Datasets that have been scraped from the Internet could pose safety risks. The authors should describe how they avoided releasing unsafe images.
- We recognize that providing effective safeguards is challenging, and many papers do not require this, but we encourage authors to take this into account and make a best faith effort.

## 12. Licenses for existing assets

Question: Are the creators or original owners of assets (e.g., code, data, models), used in the paper, properly credited and are the license and terms of use explicitly mentioned and properly respected?

Answer: [NA]

Justification: *The paper does not use existing assets.*

Guidelines:

- The answer NA means that the paper does not use existing assets.
- The authors should cite the original paper that produced the code package or dataset.
- The authors should state which version of the asset is used and, if possible, include a URL.
- The name of the license (e.g., CC-BY 4.0) should be included for each asset.
- For scraped data from a particular source (e.g., website), the copyright and terms of service of that source should be provided.
- If assets are released, the license, copyright information, and terms of use in the package should be provided. For popular datasets, [paperswithcode.com/datasets](https://paperswithcode.com/datasets) has curated licenses for some datasets. Their licensing guide can help determine the license of a dataset.
- For existing datasets that are re-packaged, both the original license and the license of the derived asset (if it has changed) should be provided.

- If this information is not available online, the authors are encouraged to reach out to the asset’s creators.

### 13. **New assets**

Question: Are new assets introduced in the paper well documented and is the documentation provided alongside the assets?

Answer: [NA]

Justification: *The paper does not release new assets.*

Guidelines:

- The answer NA means that the paper does not release new assets.
- Researchers should communicate the details of the dataset/code/model as part of their submissions via structured templates. This includes details about training, license, limitations, etc.
- The paper should discuss whether and how consent was obtained from people whose asset is used.
- At submission time, remember to anonymize your assets (if applicable). You can either create an anonymized URL or include an anonymized zip file.

### 14. **Crowdsourcing and research with human subjects**

Question: For crowdsourcing experiments and research with human subjects, does the paper include the full text of instructions given to participants and screenshots, if applicable, as well as details about compensation (if any)?

Answer: [NA]

Justification: *The paper does not involve crowdsourcing nor research with human subjects.*

Guidelines:

- The answer NA means that the paper does not involve crowdsourcing nor research with human subjects.
- Including this information in the supplemental material is fine, but if the main contribution of the paper involves human subjects, then as much detail as possible should be included in the main paper.
- According to the NeurIPS Code of Ethics, workers involved in data collection, curation, or other labor should be paid at least the minimum wage in the country of the data collector.

### 15. **Institutional review board (IRB) approvals or equivalent for research with human subjects**

Question: Does the paper describe potential risks incurred by study participants, whether such risks were disclosed to the subjects, and whether Institutional Review Board (IRB) approvals (or an equivalent approval/review based on the requirements of your country or institution) were obtained?

Answer: [NA]

Justification: *The paper does not involve crowdsourcing nor research with human subjects*

Guidelines:

- The answer NA means that the paper does not involve crowdsourcing nor research with human subjects.
- Depending on the country in which research is conducted, IRB approval (or equivalent) may be required for any human subjects research. If you obtained IRB approval, you should clearly state this in the paper.
- We recognize that the procedures for this may vary significantly between institutions and locations, and we expect authors to adhere to the NeurIPS Code of Ethics and the guidelines for their institution.
- For initial submissions, do not include any information that would break anonymity (if applicable), such as the institution conducting the review.

### 16. **Declaration of LLM usage**

Question: Does the paper describe the usage of LLMs if it is an important, original, or non-standard component of the core methods in this research? Note that if the LLM is used only for writing, editing, or formatting purposes and does not impact the core methodology, scientific rigorousness, or originality of the research, declaration is not required.

Answer: [NA]

Justification: *The core method development in this research does not involve LLMs as any important, original, or non-standard components.*

Guidelines:

- The answer NA means that the core method development in this research does not involve LLMs as any important, original, or non-standard components.
- Please refer to our LLM policy (<https://neurips.cc/Conferences/2025/LLM>) for what should or should not be described.

## **Broader Impact.**

This work advances the theoretical foundations for training large-scale multi-agent systems via gradient-based methods in hidden non-convex environments. Providing reliable convergence guarantees in such settings is a critical step toward the safe and stable deployment of multi-agent technologies, with applications ranging from distributed control and autonomous systems to robust economic mechanisms, cybersecurity infrastructures, and collaborative AI development. Beyond immediate engineering benefits, our results contribute to the fundamental understanding of strategic learning in non-convex environments, offering the potential for more predictable, transparent, and verifiable AI behavior.

From a broader societal perspective, these theoretical advances can support the design of AI systems that align more closely with human values, improve multi-agent coordination, and enhance resilience against adversarial attacks. Applications may include improving the robustness of distributed decision-making, facilitating fairer negotiation frameworks, and enabling safer autonomous cooperation among heterogeneous agents. In doing so, this work contributes to the vision of AI systems that are not only powerful but also trustworthy and beneficial (cf. [4, 96]).

However, we also recognize that the same techniques enabling reliable convergence could be leveraged in ways that carry risks. In particular, stronger convergence in competitive environments may be exploited to construct highly optimized agents for adversarial purposes, including strategic market manipulation, automated disinformation campaigns, or autonomous decision-making systems deployed without adequate oversight or alignment with human norms. Further, the scalability of multi-agent learning could amplify systemic biases or create emergent behaviors that are difficult to predict or control (cf. [28]).

Accordingly, while this work advances foundational goals in strategic machine learning, it also underscores the need for careful evaluation of downstream applications. Future research should emphasize robustness checks, fairness assessments, and human-centered design principles to ensure that strategic learning systems contribute positively to societal welfare. In particular, collaborations across technical, ethical, and policy disciplines will be crucial to anticipate and mitigate potential negative consequences as these technologies scale and proliferate.



## Appendix Contents

|                                                                                                           |           |
|-----------------------------------------------------------------------------------------------------------|-----------|
| <b>A Further Discussion in Prior Work</b>                                                                 | <b>26</b> |
| A.1 Optimization with Hidden Structures . . . . .                                                         | 26        |
| A.2 Simultaneous, Alternating, and Extrapolated Dynamics in Convex–Concave Min-Max Optimization . . . . . | 26        |
| A.3 Overparameterization in Learning Dynamics: From Minimization to Games . . . . .                       | 27        |
| A.4 Some Empirical Studies Demonstrating Need of Larger Neural Networks for Zero-Sum Games . . . . .      | 28        |
| <b>B Examples/Applications based on hidden min-max games</b>                                              | <b>29</b> |
| B.1 Neural Min-Max Games . . . . .                                                                        | 29        |
| B.2 Distributionally Robust Optimization . . . . .                                                        | 30        |
| B.3 Input-Optimization Min-Max Games . . . . .                                                            | 30        |
| <b>C Demonstrating Empirical Validity of Main Result for Input Games</b>                                  | <b>32</b> |
| <b>D Controlling the Gradient Growth: Bounds and Examples for Different Loss Functions</b>                | <b>33</b> |
| <b>E Proofs about two-sided PL &amp; AltGDA</b>                                                           | <b>34</b> |
| <b>F Proofs for Input-Optimization Min-Max Games</b>                                                      | <b>40</b> |
| <b>G Proofs for Neural-Parameters Min-Max Games</b>                                                       | <b>46</b> |
| <b>H Clarifications</b>                                                                                   | <b>51</b> |
| H.1 Smoothness on variables or Map . . . . .                                                              | 51        |
| H.2 Refined Upper Bound Expression for Lyapunov Potential $P_0$ . . . . .                                 | 51        |
| H.3 Random Initialization: How restrictive are our results? . . . . .                                     | 52        |
| <b>I Discussion &amp; Future Work</b>                                                                     | <b>53</b> |
| I.1 Deep Learning Perspective: . . . . .                                                                  | 53        |
| I.2 Game Theory Perspective: . . . . .                                                                    | 54        |

## A Further Discussion in Prior Work

### A.1 Optimization with Hidden Structures

Hidden convexity has offered a pathway to global convergence even in otherwise nonconvex problems. Early developments include the use of hidden convexity in the analysis of cubic regularization for Newton’s method [81], which achieved global rates under suitable curvature conditions. Extending such frameworks to non-smooth or stochastic optimization, however, remains an open challenge. More recently, hidden convexity has been exploited across a wide range of applications, including reinforcement learning [54, 129, 126], generative modeling [63], supply chain management [42, 24], and neural network training [119]. Further, [11] studied optimization via biased stochastic oracles, developing algorithms with  $\tilde{O}(\epsilon^{-2})$  or  $\tilde{O}(\epsilon^{-3})$  iteration complexity, depending on the oracle’s stability, and recovering new results for hidden convex problems as an application. Prior to its adoption in game theory, policy gradient methods in reinforcement learning have leveraged hidden convexity to establish global convergence guarantees [129, 8], often relying on variance-reduced estimators or large-batch assumptions. Relatedly, hidden convexity also played a crucial role in quadratic optimization problems [9, 107], revealing convex-like structures within certain nonconvex programs.

Turning to min-max optimization, hidden convexity has proven essential for addressing the limitations of classical algorithms. Vlatakis-Gkaragkounis, Flokas, and Piliouras [114] demonstrated that even benign-looking hidden zero-sum games can exhibit cyclic behaviors or divergence when trained via vanilla gradient descent-ascent (GDA). Motivated by such failures, Vlatakis-Gkaragkounis, Flokas, and Piliouras [115] introduced the formal concept of *hidden-convex hidden-concave games*, providing the first convergence guarantees for GDA in nonconvex min-max settings under suitable structural conditions such as strict or strong hidden convexity. Parallel research on non-monotone variational inequalities has developed continuous-time flows that exploit hidden convexity-like structures to ensure global convergence [79]. Extending these ideas, Sakos et al. [99] provided a fully discrete-time algorithm along with provable guarantees for stability and convergence in hidden convex games—filling an important gap compared to previous continuous-time results. Moreover, recent work has investigated preconditioned algorithms for hidden monotone variational inequalities, including Newton-type approaches [29]. Further discussions [29] have clarified under which conditions both the latent variable space and the control space can be bounded, while maintaining uniform lower bounds on the singular values of the players’ Jacobians, a critical requirement for robust convergence guarantees.

### A.2 Simultaneous, Alternating, and Extrapolated Dynamics in Convex–Concave Min-Max Optimization

Min-max optimization algorithms have a long-standing history, dating back to the original proximal point methods for variational inequality problems Martinet [74] and Rockafellar [93]. Below we present some

#### A.2.1 The classic regime

To set the stage, consider the classical min-max problem of the form  $\min_x \max_y f(x, y)$ , a fundamental template across optimization and game theory. The most natural extension of gradient descent to such settings is the *gradient descent-ascent* (GDA) method [36], which iteratively updates  $x$  to decrease  $f$  and  $y$  to increase  $f$ . GDA comes in two flavors: *simultaneous* (Sim-GDA), where  $x$  and  $y$  are updated in parallel, and *alternating* (Alt-GDA), where updates occur sequentially. However, despite its simplicity, even in convex–concave settings, vanilla GDA fails to guarantee convergence. In basic examples such as the bilinear game  $\min_x \max_y xy$ , Sim-GDA exhibits unbounded divergence, while Alt-GDA produces bounded but non-convergent iterates that circulate indefinitely [7, 49, 50, 128].

These deficiencies have led to the development of refined algorithms designed to stabilize min-max dynamics, including Extra-Gradient methods [64], Optimistic Gradient Descent [91], and negative momentum variants [50]. Many of these methods achieve accelerated rates compared to plain GDA, particularly under smoothness and convexity assumptions. Nevertheless, the bulk of this literature focuses predominantly on Sim-GDA-type algorithms, largely due to their analytical tractability.

Yet, in many real-world machine learning applications, particularly adversarial training scenarios like GANs, alternating updates more naturally model the dynamics: the generator and discriminator adjust sequentially based on each other’s output. Empirical studies [51, 76] suggest that Alt-GDA often converges faster than Sim-GDA. Despite these observations, the theoretical foundations explaining the advantages of alternation remain relatively underdeveloped. A notable advancement toward understanding this phenomenon was provided by Zhang et al. [128], who analyzed local convergence rates under strong convexity–concavity (SCSC) and smoothness assumptions. Their results show that, locally, Alt-GDA achieves iteration complexity  $\tilde{O}(\kappa)$  compared to the slower  $\tilde{O}(\kappa^2)$  of Sim-GDA, where  $\kappa = L/\mu$  denotes the condition number. Nonetheless, these results are limited to *local* convergence—i.e., after the iterates are already sufficiently close to a saddle point—and do not capture the full global behavior. More recently, further refinements have been developed combining extrapolation techniques with alternation to achieve nearly optimal condition number dependence [66].

### A.2.2 The PŁ-Regime and Nonconvex Min-Max Problems

Research has also intensified on extending convergence guarantees beyond convex–concave settings to nonconvex–nonconcave games [105, 21, 92, 109, 68, 1]. The majority of these early works often focused on settings where the objective is nonconvex in  $x$  but concave in  $y$ , and proposed algorithms that either solve inner maximizations exactly or rely on strong assumptions (e.g., Minty Variational Inequalities [68]). Others, such as Abernethy, Lai, and Wibisono [1], introduced Hamiltonian-type methods for nearly bilinear problems but relied on second-order information. Recently, Nouiehed et al. [84] studied a class of minimax problems where the objective only satisfies a one-sided PŁ-condition and introduced the GDmax algorithm, which takes multiple ascent steps at every iteration. However in our case (i) we consider the two-sided PŁ-condition which guarantees global convergence; (ii) we consider AltGDA which takes one ascent step at every iteration. Another closely related work is [18] The authors considered a specific application in generative adversarial imitation learning with linear quadratic regulator dynamics. This is a special example that falls under the two-sided PŁ-condition.

In contrast, a major breakthrough in capturing global convergence via first-order methods was provided by Yang, Kiyavash, and He [124]. They introduced the concept of two-sided Polyak–Łojasiewicz (PŁ) inequalities for nonconvex–nonconcave min-max games, showing that alternating GDA (AltGDA) converges globally at a linear rate under this structure. Furthermore, they designed a variance-reduced stochastic AltGDA method for finite-sum objectives, achieving faster convergence. Building on this, subsequent works have refined the framework: Xu et al. [122] proposed a zeroth-order variant, Liu et al. [71] analyzed randomized stochastic accelerations, and Chen, Yao, and Luo [20] integrated Spider techniques to improve stochastic convergence rates under PŁ-conditions. Extensions to more adaptive and multi-step alternating schemes were explored by Kuruzov et al. [65], aiming to further optimize the dynamics in hidden convex-concave games. At the same time [124] presented a case where simultaneous GDA will diverge from the equilibrium while AltGDA converges to the equilibrium.

## A.3 Overparameterization in Learning Dynamics: From Minimization to Games

### A.3.1 Minimizing training loss

The phenomenon of overparameterization—where neural networks possess far more parameters than the apparent complexity of the target function—has profoundly influenced the theoretical understanding of modern machine learning. Early works rigorously explored how, despite the non-convexity of the training landscape, overparameterization enables gradient-based methods to converge to global optima [98, 38, 3]. Notably, these studies typically required substantial overparameterization, often polynomial in the size of the training data or model complexity. However, empirical observations [72, 97] suggest that even modest increases in network width—sometimes adding just a few neurons—can suffice for successful training, motivating a closer study of *mild overparameterization*.

A pivotal theoretical lens for understanding this success is the *Neural Tangent Kernel* (NTK) framework [57]. In the infinite-width limit, training dynamics linearize, and gradient descent effectively follows a kernelized gradient flow determined by the NTK, which remains nearly constant throughout training. Thus, convergence can be ensured if the NTK is well-conditioned—specifically, if its

minimum eigenvalue remains bounded away from zero. At finite but large widths, convergence analyses typically require proving two properties: (i) the NTK is well-conditioned at initialization, and (ii) it remains stable during training [85, 27, 13].

Recent works have sharpened the quantitative understanding of this regime. For instance, Song et al. [106] demonstrated that a network width of approximately  $\tilde{O}(n^{3/2})$  suffices for global convergence at linear rates, improving previous state-of-the-art requirements. In parallel, studies such as [13] established NTK lower bounds that allow optimization with as few as  $\Omega(\sqrt{n})$  neurons, bridging optimization and memorization capabilities. Yet, most of these developments operate within minimization frameworks—either fitting labels or adversarially robust losses [17]. The transition from minimization to *games* (e.g., adversarial training, multi-agent learning) brings new challenges.

### A.3.2 Adversarial Losses and MARL

In adversarial learning, recent works have analyzed overparameterized adversarial training primarily from a minimization perspective, focusing on robustness against worst-case perturbations rather than strategic interactions between agents [132, 45, 25]. While robust losses (and closer to our setting) induce non-convexity, the optimization target remains a minimizer rather than a saddle point.

In multi-agent and game-theoretic settings, the literature is comparatively sparser. Policy approximation in multi-agent reinforcement learning (MARL) typically relies on either tabular or linear architectures [118, 108], and extending sample-efficient learning to rich function classes like neural networks remains a frontier. A notable contribution in this direction is the work of Jin, Liu, and Yu [58], which introduced the Multi-Agent Bellman Eluder (BE) dimension as a complexity measure for MARL, enabling sample-efficient learning of Nash equilibria in high-dimensional spaces. In the context of Markov Games, Li et al. [67] studied Nash equilibria computation using kernel-based function approximation, highlighting the difficulties of exploration and generalization in high-dimensional, non-convex settings.

Despite these advances, a comprehensive theory connecting overparameterization, NTK stability, and global convergence in *multi-agent games* remains largely undeveloped. Key questions include:

- How does overparameterization affect the conditioning of multi-agent dynamics?
- whether can alternating optimization (as opposed to simultaneous updates) exploit NTK-like stability, and how regularization or architectural choices influence convergence in strategic environments?

Our work contributes to this growing effort by combining insights from the large-scale network mappings perspective with recent advances in hidden convexity and PL conditions for nonconvex–nonconcave optimization. In particular, we highlight that under mild overparameterization, even strategic interactions—modeled via hidden convex–concave games—admit global convergence guarantees with simple gradient-based methods, provided the trajectory stays within a controlled neighborhood of initialization where the Jacobians remain well-conditioned.

### A.4 Some Empirical Studies Demonstrating Need of Larger Neural Networks for Zero-Sum Games

Since our work pertains to estimating the amount of overparameterization needed in neural networks for solving various zero-sum games, we highlight some of the works in various applied min-max contexts – adversarial training, GANs, DRO, and neural agents – which show that larger, overparameterized neural networks lead to improved convergence and performance. For instance, in case of adversarial training, Addepalli et al. [2] show improved robustness and performance in adversarial training with larger models. A few other works [61, 14, 100] empirically demonstrate how using larger architectures in GANs improve the training stability, and the quality and variation of generated images. In the realm of LLM Language agents, Karten, Nguyen, and Jin [62] show improved performance using GPT-4.0 as opposed to smaller LLMs. In the case of DRO, Pham et al. [88] show that bigger neural networks may yield better worst-group generalization.

While our main results (Theorem 3.8) concerning neural games may largely be seen to be of theoretical interest without an empirical component attached to it, we refer interested readers to Appendix C for experimental validity of our main results concerning the input games (Theorem 3.5).

## B Examples/Applications based on hidden min-max games

In the following, we present a series of examples illustrating instances of *hidden convex–concave min-max optimization* in neural network-based settings. We distinguish between two main types of problems:

- Problems where the optimization is performed over the parameters of the neural networks, given a fixed dataset (training over network weights).
- Problems where the network parameters are fixed (randomly initialized), and the optimization is performed over the input space (input-optimization games).

### B.1 Neural Min-Max Games

We begin by illustrating two canonical examples of *input-optimization games* that naturally fall within the hidden convex–concave min-max framework. Both examples demonstrate settings where neural network mappings induce structured, but hidden, convexity and concavity, which can be exploited for provable convergence.

**Example B.1** (Generative Adversarial Networks (GANs)). A *Generative Adversarial Network* (GAN) formulates a two-player minimax game where the generator  $G_\theta$  seeks to produce samples that resemble a reference distribution  $p_{\text{data}}$ , while the discriminator  $D_\phi$  attempts to distinguish generated samples from real data. The corresponding min-max problem reads:

$$\min_{\theta} \max_{\phi} \Psi(\theta, \phi) := \mathbb{E}_{x \sim p_{\text{data}}} [\log D_\phi(x)] + \mathbb{E}_{x \sim p_\theta} [\log(1 - D_\phi(x))].$$

Assuming that both  $p_{\text{data}}$  and  $p_\theta$  admit densities and that the support of  $p_\theta$  lies within the support of  $p_{\text{data}}$ , one can reformulate the problem via a latent convex–concave structure. The min-max formulation arises naturally as the generator seeks to minimize the ability of the discriminator to distinguish real from fake samples, while the discriminator simultaneously maximizes its classification performance, thus modeling an adversarial dynamic between two competing objectives. Specifically, considering a distribution  $p(x, x')$  that samples either a real or generated point, the loss can be decomposed as:

$$L_{x, x'}(p', D) := \log D(x) + \frac{p'(x')}{p_{\text{data}}(x')} \log(1 - D(x')),$$

which is jointly convex in  $p'$  and concave in  $D$ . Consequently,

$$\Psi(\theta, \phi) = \mathbb{E}_{(x, x') \sim p} [L_{x, x'}(p_\theta(x), D_\phi(x'))],$$

exhibiting the GAN training objective as a *hidden convex–concave game*.

**Example B.2** (Domain-Invariant Representation Learning (DIRL)). Domain adaptation aims to train models that generalize across different domains, despite distribution shifts between training (source) and deployment (target) environments. A popular approach [44] involves learning representations that are: (i) predictive of labels in the source domain, and (ii) invariant to the domain classifier distinguishing source versus target samples. This leads to the following min-max problem:

$$\min_{\theta_f, \theta_g} \max_{\theta_{f'}} \mathbb{E}_{(x, y) \sim P_{\text{source}}} [\ell(f_{\theta_f}(g_{\theta_g}(x)), y)] - \lambda \mathbb{E}_{(x, y') \sim P_{\text{mix}}} [\ell(f'_{\theta_{f'}}(g_{\theta_g}(x)), y')],$$

where: (i)  $g_{\theta_g}$  is the feature extractor, (ii)  $f_{\theta_f}$  is the label predictor, (iii)  $f'_{\theta_{f'}}$  is the domain classifier, (iv)  $\ell$  denotes the classification loss, and (v)  $P_{\text{source}}, P_{\text{mix}}$  are the source and mixed domain distributions, respectively. When the loss function is convex with respect to the neural mappings, the hidden convex–concave structure becomes apparent, fitting naturally into our theoretical framework.

**Example B.3** (Robust Adversarial Reinforcement Learning (RARL)). One of the major challenges in reinforcement learning (RL) is the difficulty of training agents under realistic conditions, often due to costly data collection or limited availability of real-world environments. To address these challenges, Pinto et al. [89] proposed an adversarial training framework wherein a learner agent and an adversary play against each other by solving the following min-max optimization problem:

$$\min_{\theta_1} \max_{\theta_2} \mathbb{E}_{s_0 \sim \rho, a^1 \sim \mu_{\theta_1}(s), a^2 \sim \nu_{\theta_2}(s)} \left[ \sum_{t=0}^{T-1} r^1(s_t, a_t^1, a_t^2) \right],$$

where: (i)  $\mu_{\theta_1}$  is the learner’s policy network, (ii)  $\nu_{\theta_2}$  is the adversary’s policy network, (iii)  $r^1$  denotes the reward function, and (iv)  $\rho$  is the initial state distribution.

In this setup, the learner seeks to maximize its expected reward, while the adversary perturbs the environment or dynamics to minimize the learner’s performance. Such adversarial modeling captures different sources of uncertainty: either *unknown variations in the underlying Markov Decision Process (MDP)*, or deliberate *adversarial attacks* aiming to degrade the policy (e.g., disturbances in robotic control tasks or adversarial inputs in sensor-based systems). Hidden convex–concave structures can naturally arise when suitable regularizations or smooth policy parameterizations are enforced.

**Example B.4** (Adversarial Example Generation (AEG)). In an *Adversarial Example Generation (AEG)* setting, the goal is to generate adversarial perturbations that cause misclassification by a fixed classifier  $f_\phi$ . Formally, given clean samples  $(x, y) \sim p_{\text{data}}$ , a perturbation generator  $G_\theta$  seeks to find an adversarial input  $x'$  satisfying a distortion constraint (e.g.,  $\|x - x'\|_\infty \leq \epsilon$ ) that maximizes the classification loss. The underlying min-max optimization is:

$$\min_{\phi} \max_{\theta} \Psi(\theta, \phi) := -\mathbb{E}_{(x', y) \sim p_\theta} [\ell(f_\phi(x'), y)],$$

where  $\ell$  denotes the cross-entropy loss. Here, the generator (adversary) maximizes the classification loss while the classifier seeks to minimize it. Under appropriate conditions on the neural network mappings and smoothness of the loss, the adversarial game admits a hidden convex–concave structure that can be exploited for convergence analysis.

## B.2 Distributionally Robust Optimization

In many machine learning applications, models are trained under the assumption that data is drawn from a fixed but unknown distribution. However, real-world deployment often leads to distribution shifts (e.g., label noise, adversarial perturbations, or changing environments), which can severely degrade performance. A principled way to address this issue is through *Distributionally Robust Optimization (DRO)* [77, 123], where the model is trained to perform well against the worst-case distribution within a prescribed uncertainty set. The corresponding min-max optimization problem reads:

$$\theta_{\text{DRO}}^* \in \arg \min_{\theta} \max_{P \in \mathcal{P}} \mathbb{E}_{(x, y) \sim P} [\ell(h_\theta(x), y)],$$

where: (i)  $h_\theta$  is the predictive model parameterized by  $\theta$ , (ii)  $\ell$  is a loss function (e.g., cross-entropy), (iii)  $\mathcal{P}$  is an uncertainty set containing distributions representing expected perturbations. Hidden convexity can emerge when  $\ell$  is convex in the model outputs and the uncertainty set  $\mathcal{P}$  is suitably structured.

**Example B.5** (Parametric Distributionally Robust Optimization (Parametric-DRO)). While classical DRO assumes that the uncertainty set  $\mathcal{P}$  is specified manually, identifying an appropriate  $\mathcal{P}$  is often challenging, especially at large deployment scales. To overcome this, Michel, Hashimoto, and Neubig [77] proposed modeling the worst-case distribution using a parameterized generative model  $q_\psi$ .

The resulting parametric DRO problem reads:

$$\min_{\theta} \max_{\psi: KL(q_\psi \| q_{\psi_0}) \leq \kappa} \mathbb{E}_{(x, y) \sim p} \left[ \frac{q_\psi(x, y)}{q_{\psi_0}(x, y)} \ell(h_\theta(x), y) \right],$$

where: (i)  $h_\theta$  is the predictor network, (ii)  $q_\psi$  models the perturbed distribution, (iii)  $q_{\psi_0}$  approximates the empirical distribution via maximum likelihood, (iv)  $\kappa$  controls the size of the KL-divergence ball around  $q_{\psi_0}$ . This formulation transforms the DRO problem into a min-max optimization between the model parameters  $\theta$  and the perturbation parameters  $\psi$ , both parameterized via neural networks, fitting naturally into the hidden convex–concave framework under appropriate regularization. Observe that by Pinsker’s inequality we get that KL-divergence over  $\ell_1$ -norm.

## B.3 Input-Optimization Min-Max Games

A recurring structure in adversarial and robust optimization tasks involves optimizing over input spaces rather than model parameters. Based on Wang et al. [117] we describe three prominent examples of such *input-optimization games* below:

**Example B.6** (Ensemble Attack over Multiple Models). Given  $K$  machine learning models  $\{\mathcal{M}_i\}_{i=1}^K$ , the goal is to find a universal perturbation  $\delta$  that simultaneously fools all models. The corresponding input-optimization game reads:

$$\min_{\delta \in \mathcal{X}} \max_{w \in \mathcal{P}} \sum_{i=1}^K w_i f(\delta; x_0, y_0, \mathcal{M}_i) - \frac{\gamma}{2} \|w - 1/K\|_2^2,$$

where  $w$  encodes the relative difficulty of attacking each model, and  $\gamma$  is a regularization parameter.

**Example B.7** (Universal Perturbation over Multiple Examples). Here, given a set of examples  $\{(x_i, y_i)\}_{i=1}^K$ , the objective is to find a perturbation  $\delta$  that simultaneously fools all of them. The optimization problem becomes:

$$\min_{\delta \in \mathcal{X}} \max_{w \in \mathcal{P}} \sum_{i=1}^K w_i f(\delta; x_i, y_i, \mathcal{M}) - \frac{\gamma}{2} \|w - 1/K\|_2^2.$$

This mirrors the ensemble attack setup, but focuses on perturbing multiple inputs under a fixed model  $\mathcal{M}$ .

**Example B.8** (Adversarial Attack over Data Transformations). Consider robustness against transformations (e.g., rotations, translations) applied to the inputs. Given categories of transformations  $\{p_i\}$ , the optimization reads:

$$\min_{\delta \in \mathcal{X}} \max_{w \in \mathcal{P}} \sum_{i=1}^K w_i \mathbb{E}_{t \sim p_i} [f(t(x_0 + \delta); y_0, \mathcal{M})] - \frac{\gamma}{2} \|w - 1/K\|_2^2,$$

where  $t$  denotes a random transformation sampled from  $p_i$ . When  $w = 1/K$ , this recovers the expectation-over-transformation (EOT) setup.

Observe that under a convex loss function  $f$  with respect to the neural mapping  $\mathcal{M}(x_0 + \delta)$  (i.e., hidden convexity in  $\delta$ ), and given that  $w$  appears linearly in both the bilinear coupling and the individual regularization term of separable framework of Section 1.1, the structure fits naturally within our hidden convex–concave framework. Albeit a careful reader might observe that our main results are stated for unconstrained min-max optimization, there are two standard ways to extend our analysis to constrained settings:

- First, by employing the two-proximal-PL framework developed in Kalogiannis et al. [60]—an improvement over the earlier formulation of Yang, Kiyavash, and He [124]—our convergence guarantees naturally generalize to simple constraint sets, such as  $\ell_2$ -balls for perturbations  $\delta$  and simplices for the mixture weights  $w$ .
- Alternatively, the constraints can be incorporated directly into the objective through suitable Lagrangian penalty terms, thereby reducing the constrained min-max problem to an unconstrained form amenable to our techniques.

**Unified Perspective.** Across these examples, input-optimization problems naturally exhibit a saddle-point structure, blending adversarial robustness objectives with min-max optimization techniques. They provide concrete and practically motivated instances where hidden convexity can be exploited to ensure convergence guarantees for training and robustness analysis.

## C Demonstrating Empirical Validity of Main Result for Input Games

We consider a hidden game of Rock-Paper-Scissors where two 1-hidden layer neural networks (GeLU activations) are playing the game of the Rock-Paper-Scissors. We will see here (empirically) that, if we use random Gaussian initializations for both the neural network players as described in Theorem 3.5 to define our input game of Rock-Paper-Scissors, and if we use AltGDA for finding min-max optimal strategies for both these neural network players, then the players indeed reach the  $\varepsilon$ -Nash equilibrium. In particular, both the neural network players control 5-dimensional vectors  $\theta, \phi \in \mathbb{R}^5$  and output a latent strategy that lies in the 2-dimensional simplex,  $\Delta_2$ . Both the players are optimizing the regularized bilinear objective:

$$\mathcal{L}(\theta, \phi) = F(\theta)^\top A G(\phi) + \varepsilon/2 \|F(\theta) - 1/3(1, 1, 1)^\top\|_2^2 - \varepsilon/2 \|G(\phi) - 1/3(1, 1, 1)^\top\|_2^2$$

where  $(1/3, 1/3, 1/3)^\top$  indicates the (unique)  $\varepsilon$ -mixed strategy Nash equilibrium for both the players and  $A = 10 \cdot \begin{pmatrix} 0 & -1 & 1 \\ 1 & 0 & -1 \\ -1 & 1 & 0 \end{pmatrix}$  is the payoff matrix<sup>8</sup> for the Rock-Paper-Scissor game.

Since the actual strategies of the two neural network players ( $\theta, \phi$ ) lie in  $\mathbb{R}^5$ , we can't visualize those. However, we can visualize their strategies in the latent space, i.e., in the 2-dimensional simplex instead. Figure 2 below illustrates the AltGDA trajectories for both the players (step-size = 0.01,  $\varepsilon = 1$ , maximum number of steps = 100,000). As we can see, both the trajectories converge to the  $\varepsilon$ -Nash equilibrium of the hidden game.

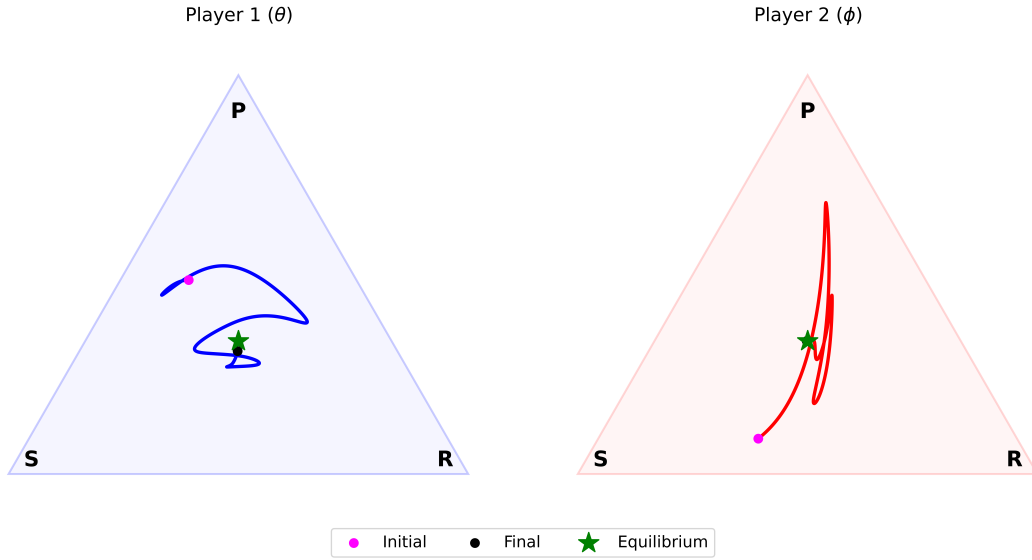

Figure 2: A trajectory of AltGDA in an  $\ell_2$ -regularized hidden game of Rock-Paper-Scissors. These trajectories correspond to each player's strategies in the latent space (2-dimensional simplex).

<sup>8</sup>A scaling factor of 10 was used in the payoff matrix to ensure that the gradients are not too small for the AltGDA updates.



## D Controlling the Gradient Growth: Bounds and Examples for Different Loss Functions

Controlling the gradient growth is critical for non-asymptotic overparameterization bounds, as it ensures that iterates remain within regions where hidden convexity persists. Below, we provide a detailed discussion about this bound for some commonly-used loss functions.

- **Mean-Squared Error (MSE) Loss:** One of the most commonly used losses and is suitable for regression tasks. For a given labelled data point  $(x, y)$  where  $x \in \mathcal{X}$  and  $y \in \mathcal{Y}$ , if the predictor function parameterized by parameters  $\theta$  is defined as  $h := h(x; \theta)$ , we see that the MSE loss can be defined as:

$$\ell(y, h) = \frac{1}{2} \|y - h\|_2^2 \quad (11)$$

$$\implies \nabla_h \ell(y, h) = h - y \quad (12)$$

$$\implies \|\nabla_h \ell(y, h)\| \leq \|h\| + \|y\| \quad (13)$$

$$\leq \|h\| + \text{diam}(\mathcal{Y}) \quad (14)$$

$$\implies \|\nabla_h \ell(y, h)\| \leq A_1 \|h\| + A_2 \text{diam}(\mathcal{Y}) + A_3 \quad (15)$$

where  $A_1 = A_2 = 1$  and  $A_3 = 0$ . More generally, if we had  $\ell(y, h) = \frac{\mu}{2} \|y - h\|_2^2$ , we would get  $A_3 = 0$  and  $A_1 = A_2 = \mu$  where  $\mu$  is also the hidden-strong convexity modulus.

- **Logistic Loss:** Commonly used in binary classification, where  $y \in \{0, 1\}$ , and the prediction  $h = h(x; \theta) \in \mathbb{R}$  is passed through the sigmoid function. The logistic loss is defined as:

$$\ell(y, h) = -y \log \sigma(h) - (1 - y) \log(1 - \sigma(h)), \quad \text{where } \sigma(h) = \frac{1}{1 + e^{-h}} \quad (16)$$

$$\nabla_h \ell(y, h) = \sigma(h) - y \quad (17)$$

$$\implies \|\nabla_h \ell(y, h)\| \leq 1 \quad (18)$$

Since the gradient is always in the interval  $[-1, 1]$ , we can take  $A_1 = 0, A_2 = 0, A_3 = 1$ . The logistic loss is strongly convex over compact domains or when regularized.

- **Squared Hinge Loss:** Used in support vector machines (SVMs) with a margin-based formulation. For  $y \in \{-1, 1\}$  and prediction  $h = h(x; \theta) \in \mathbb{R}$ :

$$\ell(y, h) = \frac{1}{2} \max(0, 1 - yh)^2 \quad (19)$$

$$\nabla_h \ell(y, h) = \begin{cases} -y(1 - yh), & \text{if } yh < 1 \\ 0, & \text{otherwise} \end{cases} \quad (20)$$

$$\implies \|\nabla_h \ell(y, h)\| \leq 2|y||h| + 1 \leq 2\|h\| + \text{diam}(\mathcal{Y}) \quad (21)$$

Thus, we can choose constants  $A_1 = 2, A_2 = 1, A_3 = 0$ . Note: the hidden strong convexity applies within the active region  $yh < 1$ , and a regularization term often ensures global strong convexity.

- **Cross-Entropy with  $\ell_2$ -regularization:** For multi-class classification with softmax outputs  $h \in \mathbb{R}^K$ , target  $y \in \Delta^{K-1}$  (probability simplex):

$$\ell(y, h) = - \sum_{k=1}^K y_k \log \left( \frac{e^{h_k}}{\sum_{j=1}^K e^{h_j}} \right) + \frac{\lambda}{2} \|h\|^2 \quad (22)$$

$$\nabla_h \ell(y, h) = \text{softmax}(h) - y + \lambda h \quad (23)$$

$$\implies \|\nabla_h \ell(y, h)\| \leq \|\text{softmax}(h) - y\| + \lambda \|h\| \leq 2 + \lambda \|h\| \quad (24)$$

So the gradient norm is bounded by  $A_1 = \lambda, A_2 = 0, A_3 = 2$ . The  $\ell_2$  term ensures strong convexity with modulus  $\lambda$ .

## E Proofs about two-sided PL & AltGDA

We begin by recalling the definitions of unconstrained continuous min-max optimality conditions of problem:

$$\min_{\theta} \max_{\phi} \mathcal{L}(\theta, \phi)$$

**Definition E.1** (Global Optima). We define three equivalent notions of optimality:

1.  $(\theta^*, \phi^*)$  is a global minimax, if for any  $(\theta, \phi)$ :  $\mathcal{L}(\theta^*, \phi) \leq \mathcal{L}(\theta^*, \phi^*) \leq \max_{\phi'} \mathcal{L}(\theta, \phi')$
2.  $(\theta^*, \phi^*)$  is a saddle point, if for any  $(\theta, \phi)$ :  $\mathcal{L}(\theta^*, y) \leq \mathcal{L}(\theta^*, \phi^*) \leq \mathcal{L}(x, \phi^*)$
3.  $(\theta^*, \phi^*)$  is a stationary point, if for any  $(\theta, \phi)$ :  $\nabla_{\theta} \mathcal{L}(\theta^*, \phi^*) = \nabla_{\phi} \mathcal{L}(\theta^*, \phi^*) = 0$ .

Thanks to gradient dominance of PL conditions, it is possible to prove the equivalence of these notions under two-sided PL condition. Observe that this reduction is crucial since gradient-based methods provide safely just a stationary point while the other two notions are global and non-trivially verifiable.

**Lemma E.2** (Lemma 2.1 in [124], Appendix C in [60]). *If the objective function  $\mathcal{L}$  satisfies the two-sided PL condition, then all three notions in Definition E.1 are equivalent:*

$$\epsilon - (\text{Saddle Point}) \iff \epsilon - (\text{Global Min-Max}) \iff \epsilon - (\text{Stationary Point}) \quad \forall \epsilon \geq 0$$

Before we present the following lemma, we provide some intuition: This result characterizes the behavior of the optimization trajectory under hidden convex–concave structure, establishing a critical link between parameter dynamics and convergence guarantees. The lemma will formalize how small distortions in the hidden geometry impact the optimization path based on parameters  $\alpha, c$ .

**Lemma 3.2** (Theorem 3.2 in [124]). *Suppose the min-max objective function  $\mathcal{L}(\theta, \phi)$  is  $L_{\nabla \mathcal{L}}$ -smooth and satisfies the two-sided PL-condition with  $(\mu_{\theta}, \mu_{\phi})$ . Then if we run AltGDA with  $\eta_{\theta} = \frac{\mu_{\phi}^2}{18L_{\nabla \mathcal{L}}^3}$  and  $\eta_{\phi} = \frac{1}{L_{\nabla \mathcal{L}}}$ , then  $\|\theta_{t+1} - \theta_t\| + \|\phi_{t+1} - \phi_t\| \leq \sqrt{\alpha} c^{t/2} \sqrt{P_0}$  where constants  $\alpha$  and  $c \in (0, 1)$  depend only on  $L_{\nabla \mathcal{L}}, \mu_{\theta}, \mu_{\phi}$  and  $P_0$  is the Lyapunov potential at time  $t = 0$ . (Please refer to Remark E.5 for the exact expressions for  $\alpha$  and  $c$ .)*

In most existing works on nonconvex–nonconcave optimization, smoothness is typically defined directly with respect to the optimization parameters. However, given our focus on a fine-grained analysis of neural min–max games, it is equally important to provide a similarly fine-grained treatment of upper bounds involving the geometry of the neural maps.

Although a neural network is, in practice, a highly smooth function, global Lipschitz continuity is incompatible with strong convexity in unconstrained domains. Nonetheless, within a bounded region—such as the ball of radius  $R$  where our iterates remain—local Lipschitzness can be rigorously characterized. The following lemma formalizes this bounds for both maximizer & minimizer neural network:

**Lemma E.3** (Local-Lipschitzness for smooth loss function). *Let  $F_{\theta}$  and  $G_{\phi}$  be neural network mappings such that they are  $\beta_F$  and  $\beta_G$  smooth as defined in Definition 2.3. Now let  $(\theta_0, \phi_0)$  be such that Jacobian singular values for both the networks are strictly positive and bounded from above and below,  $\mu_{Jac}^{(F)} \leq \sigma(\nabla_{\theta} F_{\theta_0}) \leq \nu_{Jac}^{(F)}$  and  $\mu_{Jac}^{(G)} \leq \sigma(\nabla_{\phi} G_{\phi_0}) \leq \nu_{Jac}^{(G)}$ . Suppose the stationary point for min-max objective  $\mathcal{L}(F_{\theta}, G_{\phi})$  as defined in Assumption 2.1 also lies in the ball,  $(\theta^*, \phi^*) \in \mathcal{B}((\theta_0, \phi_0), R)$ . Then there exists an  $R > 0$  such that  $\forall (\theta, \phi) \in \mathcal{B}((\theta_0, \phi_0), R)$ , we have*

$$\max_{\phi \in \mathcal{B}(\phi_0, R)} \|\nabla_{G_{\phi}} \mathcal{L}(F_{\theta}, G_{\phi})\|, \max_{\theta \in \mathcal{B}(\theta_0, R)} \|\nabla_{F_{\theta}} \mathcal{L}(F_{\theta}, G_{\phi})\| \leq L_{\mathcal{L}}^{act} \quad (25)$$

where we denote the upper bound as an ‘active’ Lipschitz constant  $L_{\mathcal{L}}^{act}$ :

$$L_{\mathcal{L}}^{act} = 4.5L_{\nabla \mathcal{L}}R \max\{\nu_{Jac}^{(F)}, \nu_{Jac}^{(G)}\} \quad (26)$$

*Proof.* Using Lemma 1 of Song et al. [106] as discussed in Section 3, if we choose  $R = \frac{\mu_{\text{Jac}}}{2\beta}$ , where  $\mu_{\text{Jac}} := \max\{\mu_{\text{Jac}}^{(F)}, \mu_{\text{Jac}}^{(G)}\}$  and  $\beta := \min\{\beta_F, \beta_G\}$ , then we see that for  $\forall(\theta, \phi) \in \mathcal{B}((\theta_0, \phi_0), R)$ , we have

$$\begin{aligned} \frac{\mu_{\text{Jac}}^{(F)}}{2} &\leq \sigma_{\min}(\nabla_{\theta} F_{\theta}) \leq \sigma_{\max}(\nabla_{\theta} F_{\theta}) \leq \frac{3\nu_{\text{Jac}}^{(F)}}{2} \\ \frac{\mu_{\text{Jac}}^{(G)}}{2} &\leq \sigma_{\min}(\nabla_{\phi} G_{\phi}) \leq \sigma_{\max}(\nabla_{\phi} G_{\phi}) \leq \frac{3\nu_{\text{Jac}}^{(G)}}{2} \end{aligned}$$

And by Lemma 4 (Appendix C) of Song et al. [106], we see that both the mapping  $F_{\theta}$  and  $G_{\phi}$  are Lipschitz-continuous in the ball  $\mathcal{B}((\theta_0, \phi_0), R)$ . That is,  $\forall(\theta, \phi), (\theta', \phi') \in \mathcal{B}((\theta_0, \phi_0), R)$ , we have the following:

$$\|F_{\theta} - F_{\theta'}\| \leq \frac{3\nu_{\text{Jac}}^{(F)}}{2} \|\theta - \theta'\| \quad (27)$$

$$\|G_{\phi} - G_{\phi'}\| \leq \frac{3\nu_{\text{Jac}}^{(G)}}{2} \|\phi - \phi'\| \quad (28)$$

where  $\sigma_{\max}(\nabla_{\theta} F_{\theta_0}) \leq \nu_{\text{Jac}}^{(F)}$  and  $\sigma_{\max}(\nabla_{\phi} G_{\phi_0}) \leq \nu_{\text{Jac}}^{(G)}$ .

Without loss of generality, we prove for the case of  $F_{\theta}$  mapping as the same argument works for the  $G_{\phi}$  mapping as well. We can observe the following for any  $(\theta, \phi) \in \mathcal{B}((\theta_0, \phi_0), R)$ :

$$\begin{aligned} \max_{\theta \in \mathcal{B}(\theta_0, R)} \|\nabla_{F_{\theta}} \mathcal{L}(F_{\theta}, G_{\phi})\| &\leq \|\nabla_{F_{\theta_0}} \mathcal{L}(F_{\theta_0}, G_{\phi})\| + \max_{\theta' \in \mathcal{B}(\theta_0, R)} \|\nabla_{F_{\theta'}} \mathcal{L}(F_{\theta'}, G_{\phi}) - \nabla_{F_{\theta_0}} \mathcal{L}(F_{\theta_0}, G_{\phi})\| \\ &\leq \|\nabla_{F_{\theta_0}} \mathcal{L}(F_{\theta_0}, G_{\phi})\| + L_{\nabla \mathcal{L}} \cdot \max_{\theta' \in \mathcal{B}(\theta_0, R)} \|F_{\theta'} - F_{\theta_0}\| \\ &\leq \|\nabla_{F_{\theta_0}} \mathcal{L}(F_{\theta_0}, G_{\phi})\| + \frac{3L_{\nabla \mathcal{L}} \nu_{\text{Jac}}^{(F)}}{2} \max_{\theta' \in \mathcal{B}(\theta_0, R)} \|\theta_0 - \theta'\| \\ (\because \text{By Eq.(27)}) & \\ &\leq \|\nabla_{F_{\theta_0}} \mathcal{L}(F_{\theta_0}, G_{\phi})\| + \frac{3L_{\nabla \mathcal{L}} \nu_{\text{Jac}}^{(F)} R}{2} \\ &= \|\nabla_{F_{\theta_0}} \mathcal{L}(F_{\theta_0}, G_{\phi}) - \underbrace{\nabla_{F_{\theta^*}} \mathcal{L}(F_{\theta^*}, G_{\phi^*})}_{=0}\| + \frac{3L_{\nabla \mathcal{L}} \nu_{\text{Jac}}^{(F)} R}{2} \quad (29) \end{aligned}$$

where the last equality holds true because  $(\theta^*, \phi^*)$  is a stationary point for the min-max objective  $\mathcal{L}(F_{\theta}, G_{\phi})$  and the Jacobian for  $F$  is non-singular as  $(\theta^*, \phi^*) \in \mathcal{B}((\theta_0, \phi_0), R)$  by assumption. That is,

$$0 = \nabla_{\theta} \mathcal{L}(F_{\theta^*}, G_{\phi^*}) = (\nabla_{\theta} F_{\theta^*})^{\top} \nabla_{F_{\theta_0}} \mathcal{L}(F_{\theta_0}, G_{\phi}) \quad (30)$$

$$\implies 0 = \|(\nabla_{\theta} F_{\theta^*})^{\top} \nabla_{F_{\theta_0}} \mathcal{L}(F_{\theta_0}, G_{\phi^*})\| = \|(\nabla_{\theta} F_{\theta^*})^{\top}\| \|\nabla_{F_{\theta_0}} \mathcal{L}(F_{\theta_0}, G_{\phi^*})\| \quad (31)$$

$$\implies 0 = \nabla_{F_{\theta_0}} \mathcal{L}(F_{\theta^*}, G_{\phi^*}) \quad (\because \nabla_{\theta} F_{\theta^*} \text{ non-singular}) \quad (32)$$

Thus, continuing from Equation (29), we have that that for any  $(\theta, \phi) \in \mathcal{B}((\theta_0, \phi_0), R)$ :

$$\begin{aligned} \max_{\theta \in \mathcal{B}(\theta_0, R)} \|\nabla_{F_{\theta}} \mathcal{L}(F_{\theta}, G_{\phi})\| &\leq \|\nabla_{F_{\theta_0}} \mathcal{L}(F_{\theta_0}, G_{\phi}) - \nabla_{F_{\theta^*}} \mathcal{L}(F_{\theta^*}, G_{\phi^*})\| + \frac{3L_{\nabla \mathcal{L}} \nu_{\text{Jac}}^{(F)} R}{2} \\ &\leq L_{\nabla \mathcal{L}} (\|F_{\theta_0} - F_{\theta^*}\| + \|G_{\phi_0} - G_{\phi^*}\|) + \frac{3L_{\nabla \mathcal{L}} \nu_{\text{Jac}}^{(F)} R}{2} \\ (\because \mathcal{L} \text{ is } L_{\nabla \mathcal{L}}\text{-smooth}) & \quad (33) \end{aligned}$$

$$\begin{aligned} &\leq \frac{3L_{\nabla \mathcal{L}} \nu_{\text{Jac}}^{(F)}}{2} \|\theta_0 - \theta^*\| + \frac{3L_{\nabla \mathcal{L}} \nu_{\text{Jac}}^{(G)}}{2} \|\phi_0 - \phi^*\| + \frac{3L_{\nabla \mathcal{L}} \nu_{\text{Jac}}^{(F)} R}{2} \\ (\because \text{By Equations (27), (28)}) & \quad (34) \end{aligned}$$

$$\begin{aligned} &\leq 3L_{\nabla \mathcal{L}} \max\{\nu_{\text{Jac}}^{(F)}, \nu_{\text{Jac}}^{(G)}\} R + \frac{3L_{\nabla \mathcal{L}} \max\{\nu_{\text{Jac}}^{(F)}, \nu_{\text{Jac}}^{(G)}\} R}{2} \\ &= 4.5L_{\nabla \mathcal{L}} \max\{\nu_{\text{Jac}}^{(F)}, \nu_{\text{Jac}}^{(G)}\} R \quad (35) \end{aligned}$$

□

To establish convergence guarantees under hidden convex–concave structure, it is essential to demonstrate that sufficient overparameterization yields a favorable initialization. Specifically, we show that: (i) the initialization lies close to a saddle point (in terms of gradient norm), and (ii) the optimization path remains within a region where the neural Jacobians have well-conditioned singular spectra. The latter will be ensured via a path length argument.

The following lemma provides a key component in this direction: it connects the initial value of the Lyapunov potential used in AltGDA (a weighted version of the Nash gap) to the gradient norms of both neural players. In subsequent lemmas, we will show that with high probability, and under sufficient width, this leads to the iterates remaining inside a well-conditioned-Jacobians’ manifold that preserves PL-condition throughout training.

**Lemma E.4** (Upper Bound on Initial Potential  $P_0$ ; Lemma 3.3 in Main Text). *Let  $F_\theta$  and  $G_\phi$  be neural network mappings such that they are  $\beta_F$  and  $\beta_G$  smooth as defined in Definition 2.3. Now let  $(\theta_0, \phi_0)$  be such that Jacobian singular values for both the networks are strictly positive and bounded from above and below,  $\mu_{\text{Jac}}^{(F)} \leq \sigma(\nabla_\theta F_{\theta_0}) \leq \nu_{\text{Jac}}^{(F)}$  and  $\mu_{\text{Jac}}^{(G)} \leq \sigma(\nabla_\phi G_{\phi_0}) \leq \nu_{\text{Jac}}^{(G)}$ . Suppose the min-max objective  $\mathcal{L}(\theta, \phi)$  is  $(\mu_\theta, \mu_\phi)$ -HSCSC. Then the initial Lyapunov potential  $P_0$  can be bounded from above as:*

$$\begin{aligned}
P_0 &\leq \|(\nabla_{F_\theta} \mathcal{L}(F_{\theta_0}, G_{\phi_0}))^\top\| \cdot \nu_{\text{Jac}}^{(F)} \cdot \frac{1}{\mu_\theta (\mu_{\text{Jac}}^{(F)})^2} \cdot \|\nabla_\theta \mathcal{L}(\theta_0, \phi_0)\| \\
&\quad + \|(\nabla_{F_\theta} \mathcal{L}(F_{\theta_0}, G_{\phi_0}))^\top\| \cdot \beta_F \frac{1}{2\mu_\theta^2 (\mu_{\text{Jac}}^{(F)})^4} \cdot \|\nabla_\theta \mathcal{L}(\theta_0, \phi_0)\|^2 \\
&\quad + (1 + \lambda) \cdot \|(\nabla_{G_\phi} \mathcal{L}(F_{\theta_0}, G_{\phi_0}))^\top\| \cdot \nu_{\text{Jac}}^{(G)} \cdot \frac{1}{\mu_\phi (\mu_{\text{Jac}}^{(G)})^2} \cdot \|\nabla_\phi \mathcal{L}(\theta_0, \phi_0)\| \\
&\quad + (1 + \lambda) \cdot \|(\nabla_{G_\phi} \mathcal{L}(F_{\theta_0}, G_{\phi_0}))^\top\| \cdot \beta_G \frac{1}{2\mu_\phi^2 (\mu_{\text{Jac}}^{(G)})^4} \cdot \|\nabla_\phi \mathcal{L}(\theta_0, \phi_0)\|^2
\end{aligned} \tag{36}$$

*Proof.* Using Lemma 1 of Song et al. [106] as discussed in Section 3, if we choose  $R = \frac{\mu_{\text{Jac}}}{2\beta}$ , where  $\mu_{\text{Jac}} := \max\{\mu_{\text{Jac}}^{(F)}, \mu_{\text{Jac}}^{(G)}\}$  and  $\beta := \min\{\beta_F, \beta_G\}$ , then we see that for  $\forall(\theta, \phi) \in \mathcal{B}((\theta_0, \phi_0), R)$ , we have

$$\begin{aligned}
\frac{\mu_{\text{Jac}}^{(F)}}{2} &\leq \sigma_{\min}(\nabla_\theta F_\theta) \leq \sigma_{\max}(\nabla_\theta F_\theta) \leq \frac{3\nu_{\text{Jac}}^{(F)}}{2} \\
\frac{\mu_{\text{Jac}}^{(G)}}{2} &\leq \sigma_{\min}(\nabla_\phi G_\phi) \leq \sigma_{\max}(\nabla_\phi G_\phi) \leq \frac{3\nu_{\text{Jac}}^{(G)}}{2}
\end{aligned}$$

And by Lemma 4 (Appendix C) of Song et al. [106], we see that both the mapping  $F_\theta$  and  $G_\phi$  are Lipschitz-continuous in the ball  $\mathcal{B}((\theta_0, \phi_0), R)$ . That is,  $\forall(\theta, \phi), (\theta', \phi') \in \mathcal{B}((\theta_0, \phi_0), R)$ , we have the following:

$$\|F_\theta - F_{\theta'}\| \leq \frac{3\nu_{\text{Jac}}^{(F)}}{2} \|\theta - \theta'\| \tag{37}$$

$$\|G_\phi - G_{\phi'}\| \leq \frac{3\nu_{\text{Jac}}^{(G)}}{2} \|\phi - \phi'\| \tag{38}$$

where  $\sigma_{\max}(\nabla_\theta F_{\theta_0}) \leq \nu_{\text{Jac}}^{(F)}$  and  $\sigma_{\max}(\nabla_\phi G_{\phi_0}) \leq \nu_{\text{Jac}}^{(G)}$ .

Since  $\mathcal{L}$  is  $(\mu_\theta, \mu_\phi)$ -HSCSC, it satisfies 2-sided PL-condition with PL-moduli as per Fact 2.6. Thus, we can obtain the following bound for  $W_0$ :

$$W_0 = \mathcal{L}(\theta_0, \phi^*(\theta_0)) - \mathcal{L}(\theta_0, \phi_0) \tag{39}$$

$$\leq (\nabla_{G_\phi} \mathcal{L}(F_{\theta_0}, G_{\phi_0}))^\top (G_{\phi^*(\theta_0)} - G_{\phi_0}) \quad (\because \text{hidden concavity}) \tag{40}$$

$$\leq \|(\nabla_{G_\phi} \mathcal{L}(F_{\theta_0}, G_{\phi_0}))^\top\| \cdot \|G_{\phi^*(\theta_0)} - G_{\phi_0}\| \tag{41}$$

$$\leq \|(\nabla_{G_\phi} \mathcal{L}(F_{\theta_0}, G_{\phi_0}))^\top\| \cdot \left( \|\nabla_\phi G_{\phi_0}\| \|\phi^*(\theta_0) - \phi_0\| + \frac{\beta_G}{2} \|\phi^*(\theta_0) - \phi_0\|^2 \right) \tag{42}$$

$$\begin{aligned}
& (\because G_\phi \text{ is } \beta_G\text{-smooth}) \\
& \leq \|(\nabla_{G_\phi} \mathcal{L}(F_{\theta_0}, G_{\phi_0}))^\top\| \cdot \left( \nu_{\text{Jac}}^{(G)} \cdot \|\phi^*(\theta_0) - \phi_0\| + \frac{\beta_G}{2} \|\phi^*(\theta_0) - \phi_0\|^2 \right) \quad (43)
\end{aligned}$$

$$\begin{aligned}
& (\because \sigma(\nabla_\theta F_{\theta_0}) \leq \nu_{\text{Jac}}^{(F)}) \\
& \leq \|(\nabla_{G_\phi} \mathcal{L}(F_{\theta_0}, G_{\phi_0}))^\top\| \cdot \left( \nu_{\text{Jac}}^{(G)} \cdot \sqrt{\frac{2}{\mu_\phi(\mu_{\text{Jac}}^{(G)})^2}} \cdot \sqrt{\mathcal{L}(\theta_0, \phi^*(\theta_0)) - \mathcal{L}(\theta_0, \phi_0)} \right. \\
& \quad \left. + \frac{\beta_G}{\mu_\phi(\mu_{\text{Jac}}^{(G)})^2} (\mathcal{L}(\theta_0, \phi^*(\theta_0)) - \mathcal{L}(\theta_0, \phi_0)) \right) \quad (44)
\end{aligned}$$

( $\because$  quadratic growth condition and Fact 2.6)

$$\begin{aligned}
\Rightarrow W_0 & \leq \|(\nabla_{G_\phi} \mathcal{L}(F_{\theta_0}, G_{\phi_0}))^\top\| \cdot \nu_{\text{Jac}}^{(G)} \cdot \frac{1}{\mu_\phi(\mu_{\text{Jac}}^{(G)})^2} \cdot \|\nabla_\phi \mathcal{L}(\theta_0, \phi_0)\| \\
& \quad + \|(\nabla_{G_\phi} \mathcal{L}(F_{\theta_0}, G_{\phi_0}))^\top\| \cdot \beta_G \frac{1}{2\mu_\phi^2(\mu_{\text{Jac}}^{(G)})^4} \cdot \|\nabla_\phi \mathcal{L}(\theta_0, \phi_0)\|^2 \quad (45)
\end{aligned}$$

(using PL-condition and Fact 2.6)

Similarly, for  $U_0$ , we can say that:

$$U_0 = \mathcal{L}(\theta_0, \phi^*(\theta_0)) - \mathcal{L}(\theta^*, \phi^*) \quad (46)$$

$$\leq \mathcal{L}(\theta_0, \phi^*(\theta_0)) - \mathcal{L}(\theta^*, \phi_0) \quad (\because \mathcal{L}(\theta^*, \phi) \leq \mathcal{L}(\theta^*, \phi^*) \forall \phi) \quad (47)$$

$$\leq \mathcal{L}(\theta_0, \phi^*(\theta_0)) - \mathcal{L}(\theta^*(\phi_0), \phi_0) \quad (\because \mathcal{L}(\theta^*, \phi_0) \geq \mathcal{L}(\theta^*(\phi_0), \phi_0)) \quad (48)$$

$$\begin{aligned}
& = \underbrace{\mathcal{L}(\theta_0, \phi^*(\theta_0)) - \mathcal{L}(\theta_0, \phi_0)}_{\textcircled{1}} + \underbrace{\mathcal{L}(\theta_0, \phi_0) - \mathcal{L}(\theta^*(\phi_0), \phi_0)}_{\textcircled{2}} \quad (49)
\end{aligned}$$

Noticing that  $\textcircled{1}$  is exactly equal to  $W_0$  and following similar arguments we used for  $W_0$  to get a upper bound for  $\textcircled{2}$  but with hidden convexity instead, we obtain the following for  $U_0$ :

$$\begin{aligned}
U_0 & \leq \|(\nabla_{G_\phi} \mathcal{L}(F_{\theta_0}, G_{\phi_0}))^\top\| \cdot \nu_{\text{Jac}}^{(G)} \cdot \frac{1}{\mu_\phi(\mu_{\text{Jac}}^{(G)})^2} \cdot \|\nabla_\phi \mathcal{L}(\theta_0, \phi_0)\| \\
& \quad + \|(\nabla_{G_\phi} \mathcal{L}(F_{\theta_0}, G_{\phi_0}))^\top\| \cdot \beta_G \frac{1}{2\mu_\phi^2(\mu_{\text{Jac}}^{(G)})^4} \cdot \|\nabla_\phi \mathcal{L}(\theta_0, \phi_0)\|^2 \quad (50) \\
& \quad + \|(\nabla_{F_\theta} \mathcal{L}(F_{\theta_0}, G_{\phi_0}))^\top\| \cdot \nu_{\text{Jac}}^{(F)} \cdot \frac{1}{\mu_\theta(\mu_{\text{Jac}}^{(F)})^2} \cdot \|\nabla_\theta \mathcal{L}(\theta_0, \phi_0)\| \\
& \quad + \|(\nabla_{F_\theta} \mathcal{L}(F_{\theta_0}, G_{\phi_0}))^\top\| \cdot \beta_F \frac{1}{2\mu_\theta^2(\mu_{\text{Jac}}^{(F)})^4} \cdot \|\nabla_\theta \mathcal{L}(\theta_0, \phi_0)\|^2
\end{aligned}$$

By combining the upper bounds obtained for  $U_0$  and  $W_0$ , we get the following upper bound on the initial potential  $P_0$ :

$$\begin{aligned}
P_0 & \leq \|(\nabla_{F_\theta} \mathcal{L}(F_{\theta_0}, G_{\phi_0}))^\top\| \cdot \nu_{\text{Jac}}^{(F)} \cdot \frac{1}{\mu_\theta(\mu_{\text{Jac}}^{(F)})^2} \cdot \|\nabla_\theta \mathcal{L}(\theta_0, \phi_0)\| \\
& \quad + \|(\nabla_{F_\theta} \mathcal{L}(F_{\theta_0}, G_{\phi_0}))^\top\| \cdot \beta_F \frac{1}{2\mu_\theta^2(\mu_{\text{Jac}}^{(F)})^4} \cdot \|\nabla_\theta \mathcal{L}(\theta_0, \phi_0)\|^2 \\
& \quad + (1 + \lambda) \cdot \|(\nabla_{G_\phi} \mathcal{L}(F_{\theta_0}, G_{\phi_0}))^\top\| \cdot \nu_{\text{Jac}}^{(G)} \cdot \frac{1}{\mu_\phi(\mu_{\text{Jac}}^{(G)})^2} \cdot \|\nabla_\phi \mathcal{L}(\theta_0, \phi_0)\| \\
& \quad + (1 + \lambda) \cdot \|(\nabla_{G_\phi} \mathcal{L}(F_{\theta_0}, G_{\phi_0}))^\top\| \cdot \beta_G \frac{1}{2\mu_\phi^2(\mu_{\text{Jac}}^{(G)})^4} \cdot \|\nabla_\phi \mathcal{L}(\theta_0, \phi_0)\|^2
\end{aligned}$$

□

**Remark E.5** (Path length bound for AltGDA). We know from Lemma 3.2 that the AltGDA path length satisfies:

$$\ell(T) \triangleq \sum_{t=0}^{T-1} (\|\theta_{t+1} - \theta_t\| + \|\phi_{t+1} - \phi_t\|) \leq \frac{\sqrt{2\alpha_1}}{1-\sqrt{c}} \cdot \sqrt{P_0} \quad (51)$$

$$\leq \sqrt{2\alpha} \frac{1+\sqrt{c}}{1-c} \sqrt{P_0} < \frac{2\sqrt{2\alpha_1}}{1-c} \cdot \sqrt{P_0} \quad (\because c \in (0, 1)) \quad (52)$$

where  $\alpha_1$ ,  $L$ , and  $c$  are defined as

$$\alpha_1 = \frac{2(1 + \eta_\phi^2 L_{\nabla\mathcal{L}}^2) \eta_\theta^2 L^2}{\mu_\theta} + \frac{20(1 + \eta_\phi^2 L_{\nabla\mathcal{L}}^2) \eta_\theta^2 L_{\nabla\mathcal{L}}^2 + 20L_{\nabla\mathcal{L}}^2 \eta_\phi^2}{\mu_\phi} \quad (53)$$

$$L = L_{\nabla\mathcal{L}} + \frac{L_{\nabla\mathcal{L}}^2}{\mu_\phi} \quad (54)$$

$$c = 1 - \frac{\mu_\theta \mu_\phi^2}{36(L_{\nabla\mathcal{L}})^3} \quad (55)$$

Now, say we define  $T$  to be the first time instant when  $(\theta_T, \phi_T) \notin \mathcal{B}((\theta_0, \phi_0), R)$  for an appropriate  $R > 0$ . And now, say, we start with appropriate  $(\theta_0, \phi_0)$  such that  $\ell(T) < R$ . A sufficient condition to ensure this would be to find  $(\theta_0, \phi_0)$  and a corresponding radius  $R > 0$  such that

$$\frac{2\sqrt{2\alpha_1}}{1-c} \sqrt{P_0} < R \quad (56)$$

$$\iff \frac{\alpha_1}{(1-c)^2} P_0 < \frac{R^2}{8} \quad (57)$$

$$\iff \left( \frac{1296L_{\nabla\mathcal{L}}^6}{\mu_\theta^2 \mu_\phi^4} \cdot \alpha_1 \right) \cdot P_0 < \frac{R^2}{8} \quad (58)$$

**Remark E.6** (Simplification of  $\alpha_1$  for AltGDA Path Length Bound). For the case of  $(\mu_\theta, \mu_\phi)$ -HSCSC and  $L_{\nabla\mathcal{L}}$ -smooth (w.r.t.  $(\theta, \phi)$ ) min-max objective function  $\mathcal{L}$  and for learning rates  $\eta_\theta = \frac{c_\theta \mu_\phi^2 \sigma_{\min}^4(\nabla_\phi G_{\phi_0})}{18L_{\nabla\mathcal{L}}^3}$  and  $\eta_\phi = \frac{c_\phi}{L_{\nabla\mathcal{L}}}$  with  $0 < c_\theta, c_\phi \leq 1$ , we can simplify  $\alpha_1$  defined above in Equation (53) for AltGDA path length bound as follows:

$$\alpha_1 = \frac{2(1 + \eta_\phi^2 L_{\nabla\mathcal{L}}^2) \eta_\theta^2 L^2}{\mu_\theta \sigma_{\min}^2(\nabla_\theta F_{\theta_0})} + \frac{20(1 + \eta_\phi^2 L_{\nabla\mathcal{L}}^2) \eta_\theta^2 L_{\nabla\mathcal{L}}^2 + 20L_{\nabla\mathcal{L}}^2 \eta_\phi^2}{\mu_\phi \sigma_{\min}^2(\nabla_\phi G_{\phi_0})} \quad (59)$$

$$\lesssim \frac{2c_\phi^2 c_\theta^2 \mu_\phi^2 \sigma_{\min}^4(\nabla_\phi G_{\phi_0})}{(18)^2 L_{\nabla\mathcal{L}}^2 \mu_\theta \sigma_{\min}^2(\nabla_\theta F_{\theta_0})} + \frac{20c_\phi^2 c_\theta^2 \mu_\phi^3 \sigma_{\min}^6(\nabla_\phi G_{\phi_0})}{18^2 L_{\nabla\mathcal{L}}^4} \quad (60)$$

In fact,  $\frac{1296L_{\nabla\mathcal{L}}^6}{\mu_\theta^2 \mu_\phi^4} \cdot \alpha_1$  simplifies to the following:

$$\begin{aligned} \frac{1296L_{\nabla\mathcal{L}}^6}{\mu_\theta^2 \mu_\phi^4} \cdot \alpha_1 &= \frac{8L_{\nabla\mathcal{L}}^4 c_\theta^2 c_\phi^2}{\mu_\theta^3 \mu_\phi^2 \sigma_{\min}^6(\nabla_\theta F_{\theta_0}) \sigma_{\min}^4(\nabla_\phi G_{\phi_0})} \\ &\quad + \frac{80c_\theta^2 c_\phi^2 L_{\nabla\mathcal{L}}^2}{\mu_\theta^2 \mu_\phi \sigma_{\min}^4(\nabla_\theta F_{\theta_0}) \sigma_{\min}^2(\nabla_\phi G_{\phi_0})} \end{aligned} \quad (61)$$

**Lemma E.7** (Simplified AltGDA path length bound condition). Consider the premise as defined in Lemma 3.2 for  $(\mu_\theta, \mu_\phi)$ -HSCSC and  $L_{\nabla\mathcal{L}}$ -smooth min-max objective with learning rates  $\eta_\theta = c_\theta \mu_\phi^2 / 18L_{\nabla\mathcal{L}}^2$  and  $\eta_\phi = c_\phi / L_{\nabla\mathcal{L}}$  with  $c_\theta, c_\phi \in (0, 1]$  along with the premise of Lemma E.4. Let  $T$  be the first time instant when  $(\theta_T, \phi_T) \notin \mathcal{B}((\theta_0, \phi_0), R)$  for an appropriate  $R > 0$ . Then to ensure  $(\theta_t, \phi_t) \in \mathcal{B}((\theta_0, \phi_0), R) \forall t \leq T$  as discussed in Remark E.5 (Equation (58)), the following is a sufficient condition:

$$\|\nabla_\theta \mathcal{L}(F_{\theta_0}, G_{\phi_0})\| + \|\nabla_\phi \mathcal{L}(F_{\theta_0}, G_{\phi_0})\| \lesssim \frac{R^2}{8} \quad (62)$$

given that  $c_\theta$  and  $c_\phi$  are chosen such that:

$$c_\theta = \sqrt{\frac{1}{4 \cdot A_\theta \cdot B_\phi}} \quad \text{and} \quad c_\phi = 1 \quad (63)$$

where

$$\begin{aligned} A_\theta = & \left( (1 + \|\nabla_{F_\theta} \mathcal{L}(F_{\theta_0}, G_{\phi_0})\|) \cdot \left(1 + 8L_{\nabla \mathcal{L}}^4 \nu_{Jac}^{(F)}\right) \cdot \left(1 + \frac{1}{\mu_\theta^3 (\mu_{Jac}^{(F)})^6}\right) \cdot (1 + \|\nabla_\theta \mathcal{L}(F_{\theta_0}, G_{\phi_0})\|) \right) \\ & \cdot \left(1 + 80L_{\nabla \mathcal{L}}^2 \nu_{Jac}^{(F)}\right) \cdot \left(1 + \frac{1}{\mu_\theta^3 (\mu_{Jac}^{(F)})^4}\right) \cdot \left(1 + 8L_{\nabla \mathcal{L}}^4 \beta_F\right) \cdot \left(1 + \frac{1}{2\mu_\theta^5 (\mu_{Jac}^{(F)})^{10}}\right) \cdot (1 + 80L_{\nabla \mathcal{L}}^2 \beta_F) \\ & \cdot \left(1 + \frac{1}{2\mu_\theta^4 (\mu_{Jac}^{(F)})^8}\right) \cdot \left(1 + \frac{1}{\mu_\theta^2 (\mu_{Jac}^{(F)})^4}\right) \cdot \left(1 + \frac{1}{2\mu_\theta^3 (\mu_{Jac}^{(F)})^6}\right) \end{aligned}$$

and

$$\begin{aligned} B_\phi = & \left( (1 + \|\nabla_{G_\phi} \mathcal{L}(F_{\theta_0}, G_{\phi_0})\|) \cdot \left(1 + \frac{1}{\mu_\phi^3 (\mu_{Jac}^{(G)})^6}\right) \cdot \left(1 + \frac{1}{\mu_\phi (\mu_{Jac}^{(G)})^4}\right) \cdot \left(1 + \frac{1}{\mu_\phi^2 (\mu_{Jac}^{(G)})^4}\right) \right) \\ & \cdot \left(1 + \frac{1}{\mu_\phi (\mu_{Jac}^{(G)})^2}\right) \cdot (1 + \lambda) \cdot (1 + \|\nabla_\phi \mathcal{L}(F_{\theta_0}, G_{\phi_0})\|) \cdot \left(1 + 80L_{\nabla \mathcal{L}}^2 \nu_{Jac}^{(G)}\right) \cdot (1 + 8L_{\nabla \mathcal{L}}^4 \beta_G) \\ & \cdot \left(1 + \frac{1}{\mu_\phi^4 (\mu_{Jac}^{(G)})^8}\right) \cdot (1 + 80L_{\nabla \mathcal{L}}^2 \beta_G) \cdot \left(1 + \frac{1}{\mu_\phi^3 (\mu_{Jac}^{(G)})^8}\right) \end{aligned}$$

*Proof.* By choosing  $c_\theta$  and  $c_\phi$  as specified above and using observations from Remark E.6 (Equation (61)), a sufficient condition to ensure the iterates never leave as derived in Remark E.5 (Equation (58)) can be further simplified as follows:

$$\begin{aligned} & \left( \frac{1296L_{\nabla \mathcal{L}}^6}{\mu_\theta^2 \mu_\phi^4} \cdot \alpha_1 \right) \cdot P_0 < \frac{R^2}{8} \\ \therefore & \left( \frac{8L_{\nabla \mathcal{L}}^4 c_\theta^2 c_\phi^2}{\mu_\theta^3 \mu_\phi^2 \sigma_{\min}^6(\nabla_\theta F_{\theta_0}) \sigma_{\min}^4(\nabla_\phi G_{\phi_0})} + \frac{80c_\theta^2 c_\phi^2 L_{\nabla \mathcal{L}}^2}{\mu_\theta^2 \mu_\phi \sigma_{\min}^4(\nabla_\theta F_{\theta_0}) \sigma_{\min}^2(\nabla_\phi G_{\phi_0})} \right) \cdot P_0 < \frac{R^2}{8} \\ \therefore & T_1 \|\nabla_\theta \mathcal{L}(\theta_0, \phi_0)\| + T_2 \|\nabla_\theta \mathcal{L}(\theta_0, \phi_0)\|^2 + T_3 \|\nabla_\phi \mathcal{L}(\theta_0, \phi_0)\| + T_4 \|\nabla_\phi \mathcal{L}(\theta_0, \phi_0)\|^2 < \frac{R^2}{8} \end{aligned}$$

where  $T_j$ 's are coefficients of the gradient norms as per Equations (61) and (58). Notice that both  $T_2$  and  $T_4$  contain  $c_\theta^2$  and as per our choice of  $c_\theta$ ,  $c_\theta^2$  contains  $\frac{1}{1 + \|\nabla_\theta \mathcal{L}(F_{\theta_0}, G_{\phi_0})\|}$  and  $\frac{1}{1 + \|\nabla_\phi \mathcal{L}(F_{\theta_0}, G_{\phi_0})\|}$  terms which can help absorb one of the powers of the gradient norms  $\|\nabla_\theta \mathcal{L}(F_{\theta_0}, G_{\phi_0})\|$  or  $\|\nabla_\phi \mathcal{L}(F_{\theta_0}, G_{\phi_0})\|$  in terms corresponding to  $T_2$  and  $T_4$ . This will help constructing (as shown below) a simpler sufficient condition that would require only the norm of the loss' gradient w.r.t. parameters  $\theta, \phi$  to be small. Furthermore, by construction,  $c_\theta \leq 1/2, c_\phi = 1$ . Therefore, we have that  $T_i \leq 1 \forall i \in [4]$ . Combining all of the above, what we require for ensuring iterates never leave the ball of radius  $R$  is as follows:

$$\|\nabla_\theta \mathcal{L}(F_{\theta_0}, G_{\phi_0})\| + \|\nabla_\phi \mathcal{L}(F_{\theta_0}, G_{\phi_0})\| \lesssim \frac{R^2}{8} \quad (64)$$

□

**Remark E.8** (Local-smoothness constant). If the iterates  $(\theta_t, \phi_t) \forall t$  stay within the ball  $\mathcal{B}((\theta_0, \phi_0), R)$ , by invoking H.3, we can use the local-Lipschitz constant derived Lemma E.3 along with the smoothness of the neural network maps  $(\beta_F, \beta_G)$  to obtain the exact value of the smoothness constant for the HSCSC and smooth loss as  $L_{\nabla \mathcal{L}} = L_{\mathcal{L}}^{\text{act}} \max\{\beta_F, \beta_G\}$ .

## F Proofs for Input-Optimization Min-Max Games

The following result characterizes the lower and upper bounds on the singular values of the Jacobian for the case of Input-Optimization Min-Max Games. In particular, we bring out the dependence of these lower and upper bounds on the size of the hidden layer,  $d_1^{(F)}$  and  $d_1^{(G)}$ , and variances for random Gaussian initializations of the neural network layers,  $\{\sigma_k^{(F)}\}_{k \in [2]}$  and  $\{\sigma_k^{(G)}\}_{k \in [2]}$ , for both the players  $F$  and  $G$ . Computing the lower bound on singular values is important as it's used in defining the radius around the initial parameters to ensure the neural network Jacobian remains non-singular within the entire ball. Moreover, these lower and upper bounds will be helpful in determining a set of sufficient conditions on the variances for ensuring the AltGDA trajectory reaches the saddle point.

**Lemma F.1** (Lemma 3.4 in Main Paper). *Consider a neural network  $F$  with parameters  $\theta \in \mathbb{R}^{d_0^{(F)}}$  defined as  $F(\theta) = W_2^{(F)}\psi(W_1^{(F)}\theta)$  where  $W_k^{(F)} \in \mathbb{R}^{d_k^{(F)} \times d_{k-1}^{(F)}}$  ( $k \in \{1, 2\}$ ),  $(W_1^{(F)})_{i,j} \sim \mathcal{N}(0, (\sigma_1^{(F)})^2) \forall i, j$ ,  $(W_2^{(F)})_{k,l} \sim \mathcal{N}(0, (\sigma_2^{(F)})^2) \forall k, l$  and  $\psi$  is the GeLU activation function with  $d_1^{(F)} \geq 256d_0^{(F)}$ ,  $d_1^{(F)} \geq 256d_2^{(F)}$  and  $(\sigma_1^{(F)})^2 < \frac{\pi}{4Cd_1^{(F)}\|\theta\|^2}$ . Then the minimum singular value of the Jacobian  $\nabla_\theta F_\theta$  is lower bounded as*

$$\sigma_{\min}(\nabla_\theta F_\theta) > \frac{\sigma_1^{(F)}\sigma_2^{(F)}d_1^{(F)}}{16} \cdot \left( \frac{1}{2} - \sigma_1^{(F)}\|\theta\| \sqrt{\frac{Cd_1^{(F)}}{\pi}} \right) \quad (65)$$

w.p.  $\geq 1 - 2e^{-\frac{d_1^{(F)}}{64}} - e^{-Cd_1^{(F)}}$ . The maximum singular value of  $\nabla_\theta F_\theta$  is upper bounded as

$$\sigma_{\max}(\nabla_\theta F_\theta) < 3.47\sigma_1^{(F)}\sigma_2^{(F)}d_1^{(F)} \quad (66)$$

w.p.  $\geq 1 - 2e^{-\frac{d_1^{(F)}}{64}}$ .

*Proof.* By Theorem 4.6.1 in [110], we get w.p.  $\geq 1 - 2e^{-t^2}$ :

$$\sigma_1(\sqrt{d_1^{(F)}} - 4(\sqrt{d_0^{(F)}} + t)) \leq \sigma_{\min}(W_1^{(F)}) \leq \sigma_{\max}(W_1^{(F)}) \leq \sigma_1^{(F)}(\sqrt{d_1^{(F)}} + 4(\sqrt{d_0^{(F)}} + t)). \quad (67)$$

By choosing  $t = \frac{1}{8}\sqrt{d_1^{(F)}}$ , we get w.p.  $\geq 1 - 2e^{-d_1^{(F)}/64}$

$$\sigma_1^{(F)}\left(\frac{1}{2}\sqrt{d_1^{(F)}} - 4\sqrt{d_0^{(F)}}\right) \leq \sigma_{\min}(W_1^{(F)}) \leq \sigma_{\max}(W_1^{(F)}) \leq \sigma_1^{(F)}\left(\frac{3}{2}\sqrt{d_1^{(F)}} + 4\sqrt{d_0^{(F)}}\right). \quad (68)$$

If we set  $d_1^{(F)} \geq 256d_0^{(F)}$ , we get

$$\left(\frac{1}{2}\sqrt{d_1^{(F)}} - 4\sqrt{d_0^{(F)}}\right) \geq \frac{1}{4}\sqrt{d_1^{(F)}} \quad (69)$$

and

$$\frac{3}{2}\sqrt{d_1^{(F)}} + 4\sqrt{d_0^{(F)}} \leq \frac{7}{4}\sqrt{d_1^{(F)}}. \quad (70)$$

Therefore, we get that w.p.  $\geq 1 - 2e^{-\frac{d_1^{(F)}}{64}}$ ,

$$\frac{1}{4}\sigma_1^{(F)}\sqrt{d_1^{(F)}} \leq \sigma_{\min}(W_1^{(F)}) \leq \sigma_{\max}(W_1^{(F)}) \leq \frac{7}{4}\sigma_1^{(F)}\sqrt{d_1^{(F)}}. \quad (71)$$

For the case of  $W_2^{(F)}$ , because we have  $d_2^{(F)} < d_1^{(F)}$ , we will use analogous reasoning as that for  $W_1^{(F)}$  above for  $(W_2^{(F)})^\top$  with  $t = \frac{1}{8}\sqrt{d_1^{(F)}}$  which yields w.p.  $\geq 1 - 2e^{-\frac{d_1^{(F)}}{64}}$ ,

$$\sigma_2^{(F)}\left(\frac{1}{2}\sqrt{d_1^{(F)}} - 4\sqrt{d_2^{(F)}}\right) \leq \sigma_{\min}((W_2^{(F)})^\top) = \sigma_{\min}(W_2^{(F)}) \quad (72)$$



$$\leq \sigma_{\max}((W_2^{(F)})^\top) = \sigma_{\max}(W_2^{(F)}) \leq \sigma_2^{(F)} \left( \frac{3}{2} \sqrt{d_1^{(F)}} + 4 \sqrt{d_2^{(F)}} \right) \quad (73)$$

Then, by setting  $d_1^{(F)} \geq 256d_2^{(F)}$ , we get

$$\frac{1}{4} \sigma_2^{(F)} \sqrt{d_1^{(F)}} \leq \sigma_{\min}(W_2^{(F)}) \leq \sigma_{\max}(W_2^{(F)}) \leq \frac{7}{4} \sigma_2^{(F)} \sqrt{d_1^{(F)}}$$

Note that the Jacobian for the neural network  $F(\theta)$  can be computed as

$$\nabla_{\theta} F_{\theta} = \frac{\partial F(\theta)}{\partial \theta} = W_2^{(F)} \frac{\partial}{\partial z} \psi(z) W_1^{(F)} = W_2^{(F)} \Psi(W_1^{(F)} \theta) W_1^{(F)} \quad (74)$$

where  $z := W_1^{(F)} \theta$  and  $\Psi(W_1^{(F)} \theta) = \text{diag}(\psi'((W_1^{(F)} \theta)_1), \dots, \psi'((W_1^{(F)} \theta)_{d_1^{(F)}}))$ . Therefore, we can compute the minimum and maximum singular values for this Jacobian  $\nabla_{\theta} F_{\theta}$  by looking at its operator norm:  $\|\nabla_{\theta} F_{\theta}\| = \|W_2^{(F)} \Psi(W_1^{(F)} \theta) W_1^{(F)}\|$ . Then, by properties of the operator norm, we see that

$$\|\nabla_{\theta} F_{\theta}\| \geq \sigma_{\min}(W_2^{(F)}) \|\Psi(W_1^{(F)} \theta)\| \sigma_{\min}(W_1^{(F)}) \quad (75)$$

$$\|\nabla_{\theta} F_{\theta}\| \leq \sigma_{\max}(W_2^{(F)}) \|\Psi(W_1^{(F)} \theta)\| \sigma_{\max}(W_1^{(F)}) \quad (76)$$

This further tells us that

$$\sigma_{\min}(\nabla_{\theta} F_{\theta}) \geq \sigma_{\min}(W_2^{(F)}) \sigma_{\min}(\Psi(W_1^{(F)} \theta)) \sigma_{\min}(W_1^{(F)}) \quad (77)$$

$$\sigma_{\max}(\nabla_{\theta} F_{\theta}) \leq \sigma_{\max}(W_2^{(F)}) \sigma_{\max}(\Psi(W_1^{(F)} \theta)) \sigma_{\max}(W_1^{(F)}) \quad (78)$$

We can further simplify these lower and upper bounds for the Jacobian singular values by noting that since  $\Psi(W_1^{(F)} \theta)$  is a diagonal matrix,  $\sigma_{\min}(\Psi(W_1^{(F)} \theta)) = \min_{1 \leq i \leq d_1^{(F)}} \psi'(z_i)$  and

$$\sigma_{\max}(\Psi(W_1^{(F)} \theta)) = \max_{1 \leq i \leq d_1^{(F)}} \psi'(z_i) \text{ where } z_i = (W_1^{(F)} \theta)_i \forall i \in [d_1^{(F)}].$$

Now, notice that  $z = W_1^{(F)} \theta \sim \mathcal{N}(0, (\sigma_1^{(F)})^2 \|\theta\|_2^2 I_{d_1^{(F)} \times d_1^{(F)}})$ . Using the fact that GeLU's derivative,  $\psi'$ , is  $L_{\psi'}$ -Lipschitz with  $L_{\psi'} = \sup_{x \in \mathbb{R}} |\psi''(x)| = \varphi(0) = \frac{2}{\sqrt{\pi}}$  ( $\varphi$  is standard normal PDF), we can appeal to concentration inequality for Lipschitz functions of Gaussian random variables and infer for  $0 < \epsilon < 1/2$ :

$$P[\sigma_{\min}(\Psi(W_1^{(F)} \theta)) > \epsilon] = P[\forall i : \psi'((W_1^{(F)} \theta)_i) > \epsilon] = (P[\psi'((W_1^{(F)} \theta)_1) > \epsilon])^{d_1^{(F)}} \quad (79)$$

$$= (P[\psi'((W_1^{(F)} \theta)_1) - 1/2 > \epsilon - 1/2])^{d_1^{(F)}} \quad (80)$$

$$= (P[\psi'((W_1^{(F)} \theta)_1) - E[\psi'((W_1^{(F)} \theta)_1)] > \epsilon - 1/2])^{d_1^{(F)}} \quad (81)$$

$$(\because E[\psi'((W_1^{(F)} \theta)_1)] = E[(W_1^{(F)} \theta)_1 \varphi((W_1^{(F)} \theta)_1)] + E[\Phi((W_1^{(F)} \theta)_1)] = 0 + 1/2) \quad (82)$$

$$(\varphi, \Phi \text{ are standard normal PDF \& CDF, resp.}) \quad (83)$$

$$\geq 1 - e^{-\frac{(1/2-\epsilon)^2}{2L_{\psi'}^2 (\sigma_1^{(F)})^2 \|\theta\|^2}} \quad (84)$$

$$(\because P[\psi'(z) \leq 1/2 - t] \leq e^{-\frac{\pi t^2}{(\sigma_1^{(F)})^2 \|\theta\|^2}}, \text{ choose } t = 1/2 - \epsilon) \quad (85)$$

$$= 1 - e^{-C d_1^{(F)}} \text{ (if we set } \epsilon = 1/2 - (\sigma_1^{(F)} \|\theta\| \sqrt{C d_1^{(F)}} / \pi)) \quad (86)$$

Therefore, as long as we have  $(\sigma_1^{(F)})^2 < \frac{\pi}{4C d_1^{(F)} \|\theta\|^2}$ , we have w.p.  $\geq 1 - e^{-C d_1^{(F)}}$  that

$$\sigma_{\min}(\Psi(W_1^{(F)} \theta)) > \frac{1}{2} - \sigma_1^{(F)} \|\theta\| \sqrt{\frac{C d_1^{(F)}}{\pi}} \quad (87)$$

Combining all of this, we can say w.p.  $\geq 1 - 2e^{-\frac{d_1^{(F)}}{64}} - e^{-C d_1^{(F)}}$ , we have:

$$\sigma_{\min}(\nabla_{\theta} F_{\theta}) > \frac{\sigma_1^{(F)} \sigma_2^{(F)} d_1^{(F)}}{16} \cdot \left( \frac{1}{2} - \sigma_1^{(F)} \|\theta\| \sqrt{\frac{C d_1^{(F)}}{\pi}} \right). \quad (88)$$

And w.p.  $\geq 1 - 2e^{-\frac{d_1^{(F)}}{64}}$ , we have:  $\sigma_{\max}(\nabla_{\theta} F_{\theta}) < \left(\frac{7\sqrt{d_1^{(F)}}}{4}\right)^2 \cdot 1.13\sigma_1^{(F)}\sigma_2^{(F)} < 3.47\sigma_1^{(F)}\sigma_2^{(F)}d_1^{(F)}$  where we used the fact that  $\max_{x \in \mathbb{R}} \psi'(x) = \psi'(\sqrt{2}) \approx 1.1289$ .  $\square$

Before we present the following lemma, we provide some intuition: In addition to the previous lemma for high probability lower and upper bounds on singular values of the neural network Jacobian, we also need to check whether the networks in input-optimization games are smooth or not. Towards that, the following result proves that it is so and provides the exact smoothness constant. Computing this smoothness constant is important for another reason: It is used in defining the radius around the initial parameters to ensure the neural network Jacobian remains non-singular within the entire ball.

**Lemma F.2** (Lemma 3.4 in Main Paper). *Consider a neural network  $F$  with parameters  $\theta \in \mathbb{R}^{d_0^{(F)}}$  as defined in Lemma F.1 above. Then, w.p.  $\geq 1 - 2e^{-\frac{d_1^{(F)}}{64}}$  the neural network  $F$  is  $\beta_F$ -smooth where  $\beta_F = \frac{1}{\sqrt{2\pi}} \cdot \frac{343(\sigma_1^{(F)})^2\sigma_2^{(F)}(d_1^{(F)})^{3/2}}{32}$ .*

*Proof.* In order to prove that  $F$  is  $\beta_F$ -smooth, we need to show that Equation 2 holds true. For  $\theta, \theta' \in \mathbb{R}^{d_0^{(F)}}$ , we write

$$\|\nabla_{\theta} F_{\theta} - \nabla_{\theta} F_{\theta'}\| \leq \|W_2^{(F)}\| \|\Psi(W_1^{(F)}\theta) - \Psi(W_1^{(F)}\theta')\| \|W_1^{(F)}\| \quad (89)$$

$$\leq \|W_2^{(F)}\| L_{\psi'} \|W_1^{(F)}\theta - W_1^{(F)}\theta'\| \|W_1^{(F)}\| \quad (\because \psi' \text{ is } L_{\psi'} - \text{Lipschitz}) \quad (90)$$

$$= L_{\psi'} \|W_2^{(F)}\| \|W_1^{(F)}\| \|\theta - \theta'\| \|W_1^{(F)}\| \quad (91)$$

$$\implies \sigma_{\max}(\nabla_{\theta} F_{\theta} - \nabla_{\theta} F_{\theta'}) \leq \frac{2}{\sqrt{2\pi}} \sigma_{\max}(W_2^{(F)}) \cdot \sigma_{\max}^2(W_1^{(F)}) \|\theta - \theta'\| \quad (92)$$

where  $L_{\psi'} = \frac{2}{\sqrt{2\pi}}$  for derivative of GeLU activation function. Using Lemma F.1 results for singular values of the random matrices  $W_1^{(F)}$  and  $W_2^{(F)}$ , we get that w.p.  $\geq 1 - 2e^{-\frac{d_1^{(F)}}{64}}$

$$\sigma_{\max}(\nabla_{\theta} F_{\theta} - \nabla_{\theta} F_{\theta'}) \leq \frac{343(\sigma_1^{(F)})^2\sigma_2^{(F)}(d_1^{(F)})^{3/2}}{32\sqrt{2\pi}} \|\theta - \theta'\| \quad (93)$$

$\square$

The result in the main paper offers an average-case analysis under Gaussian sampling with variance scaled as  $\text{poly}(1/d_1)$ . Here, we provide a more detailed version that explicitly states the assumptions and technical conditions required to ensure convergence to equilibrium. While the high-level complexity perspective remains unchanged, we believe this finer analysis may be of independent interest, particularly for applications in adversarial attack design.

**Theorem F.3** (Theorem 3.5 in Main Paper). *Consider two neural networks  $F, G$  with parameters  $\theta \in \mathbb{R}^{d_0^{(F)}}$  and  $\phi \in \mathbb{R}^{d_0^{(G)}}$ , respectively, as defined in Lemma F.1 above. Then for the  $\varepsilon$ -regularized bilinear min-max objective  $\mathcal{L}(\theta, \phi)$  as defined in Equation (3) with the neural networks  $F$  and  $G$  defined above, alternating gradient-descent-ascent with appropriate fixed learning rates  $\eta_{\theta}, \eta_{\phi}$  (see Lemma E.7) reaches the desired saddle point w.p.  $\geq 1 - 4e^{-\frac{d_1^{(F)}}{64}} - 4e^{-\frac{d_1^{(G)}}{64}} - e^{-Cd_1^{(F)}} - e^{-Cd_1^{(G)}}$  ( $C$  are some universal constants) if the initial parameters  $(\theta_0, \phi_0)$  and standard deviations  $\sigma_k^{(F)}$  and  $\sigma_k^{(G)}$ ,  $k \in \{1, 2\}$  are chosen such that:*

$$(\sigma_1^{(F)})^2 < \frac{\pi}{4Cd_1^{(F)}\|\theta_0\|^2} \ \& \ (\sigma_1^{(G)})^2 < \frac{\pi}{4Cd_1^{(G)}\|\phi_0\|^2} \quad (94)$$

$$\frac{(\sigma_1^{(F)})^4 \cdot (\sigma_2^{(F)})^2 \cdot \|\theta_0\|}{\left(\frac{1}{2} - (\sigma_1^{(F)})\|\theta_0\|\sqrt{\frac{Cd_1^{(F)}}{\pi}}\right)^2} \lesssim \frac{\pi}{\varepsilon \cdot (d_1^{(F)})^{3.5}} \quad (95)$$

$$\frac{(\sigma_1^{(G)})^4 \cdot (\sigma_2^{(G)})^2 \cdot \|\phi_0\|}{\left(\frac{1}{2} - (\sigma_1^{(G)})\|\phi_0\|\sqrt{\frac{Cd_1^{(G)}}{\pi}}\right)^2} \lesssim \frac{\pi}{\varepsilon \cdot (d_1^{(G)})^{3.5}} \quad (96)$$

$$\frac{(\sigma_1^{(G)}\sigma_2^{(G)})((\sigma_1^{(F)})^3\sigma_2^{(F)})\|\theta_0\|}{\left(\frac{1}{2} - (\sigma_1^{(F)})\|\theta_0\|\sqrt{\frac{Cd_1^{(F)}}{\pi}}\right)^2} \lesssim \frac{\pi}{\sigma_{\max}(A)(d_1^{(F)})^{2.5}} \quad (97)$$

$$\frac{(\sigma_1^{(F)}\sigma_2^{(F)})((\sigma_1^{(G)})^3\sigma_2^{(G)})\|\phi_0\|}{\left(\frac{1}{2} - (\sigma_1^{(G)})\|\phi_0\|\sqrt{\frac{Cd_1^{(G)}}{\pi}}\right)^2} \lesssim \frac{\pi}{\sigma_{\max}(A)(d_1^{(G)})^{2.5}} \quad (98)$$

*Proof.* Since  $\mathcal{L}(\theta, \phi)$  is  $\varepsilon$ -hidden-strongly-convex-strongly-concave, by Fact 2.6 it also satisfies the 2-sided PL-condition with  $(\mu_\theta = \varepsilon \cdot \sigma_{\min}^2(\nabla_\theta F_\theta), \mu_\phi = \varepsilon \cdot \sigma_{\min}^2(\nabla_\phi G_\phi))$  w.p.  $\geq 1 - 2e^{-\frac{d_1}{64}} - e^{-Cd_1}$ , we can utilise path-length bound as derived in Lemma 3.2 which leaves us with controlling the potential  $P_0$  for ensuring convergence to the saddle point. Thus, computing loss gradients (Equation (4)) and using the sufficient condition for ensuring iterates do not leave the ball  $\mathcal{B}((\theta_0, \phi_0), R)$  (where  $R = \frac{\max\{\mu_{\text{Jac}}^{(F)}, \mu_{\text{Jac}}^{(G)}\}}{\min\{\beta_F, \beta_G\}}$  as defined in Section 3) thus ensuring non-singular Jacobian inside the ball for both the neural networks (Lemma E.7), we require the following:

$$\left( \|F(\theta_0)\| \cdot (\varepsilon\sigma_{\max}(\nabla_\theta F_{\theta_0}) + \sigma_{\max}(\nabla_\phi G_{\phi_0})\sigma_{\max}(A)) \right. \\ \left. + \|G(\phi_0)\| \cdot (\sigma_{\max}(\nabla_\theta F_{\theta_0})\sigma_{\max}(A) + \varepsilon\sigma_{\max}(\nabla_\phi G_{\phi_0})) \right) \lesssim \frac{R^2}{8} \quad (99)$$

Thus, we want

$$\left( (3.47\varepsilon\sigma_1^{(F)}\sigma_2^{(F)}d_1^{(F)})\|F(\theta_0)\| + (3.47\sigma_1^{(G)}\sigma_2^{(G)}d_1^{(G)}\sigma_{\max}(A))\|F(\theta_0)\| \right. \\ \left. + (3.47\sigma_1^{(F)}\sigma_2^{(F)}d_1^{(F)}\sigma_{\max}(A))\|G(\phi_0)\| + (3.47\varepsilon\sigma_1^{(G)}\sigma_2^{(G)}d_1^{(G)})\|G(\phi_0)\| \right) \lesssim \frac{R^2}{8} \quad (100)$$

( $\cdot \cdot \sigma_{\max}(\nabla_\theta F_{\theta_0}) < 3.47\sigma_1^{(F)}\sigma_2^{(F)}d_1^{(F)}, \sigma_{\max}(\nabla_\phi G_{\phi_0}) < 3.47\sigma_1^{(G)}\sigma_2^{(G)}d_1^{(G)}$ )

Therefore, we want the following to hold true:

1.  $(3.47\varepsilon\sigma_1^{(F)}\sigma_2^{(F)}d_1^{(F)})\|F(\theta_0)\| \lesssim \frac{R^2}{32}$
2.  $(3.47\sigma_{\max}(A)\sigma_1^{(G)}\sigma_2^{(G)}d_1^{(G)})\|F(\theta_0)\| \lesssim \frac{R^2}{32}$
3.  $(3.47\sigma_{\max}(A)\sigma_1^{(F)}\sigma_2^{(F)}d_1^{(F)})\|G(\phi_0)\| \lesssim \frac{R^2}{32}$
4.  $(3.47\varepsilon\sigma_1^{(G)}\sigma_2^{(G)}d_1^{(G)})\|G(\phi_0)\| \lesssim \frac{R^2}{32}$

Since  $\|F(\theta_0)\| \leq \sigma_{\max}(W_2^{(F)})\sigma_{\max}(\psi(W_1^{(F)}\theta_0))$ , we can use Lemma F.1 for maximum singular values of  $W_2^{(F)}$  and the following calculation for upper bounding  $\psi(W_1^{(F)}\theta)$ :

$$\|\psi((W_1^{(F)}\theta))\| \leq \sqrt{d_1^{(F)}} \max_i |\psi((W_1^{(F)}\theta)_i)| \quad (101)$$

$$\implies P[\|\psi(W_1^{(F)}\theta)\| > t] \leq P[\sqrt{d_1^{(F)}} \max_i |(W_1^{(F)}\theta)_i| > t] \quad (102)$$

$$\text{Also, } P[\max_i |(W_1^{(F)}\theta)_i| > t] \leq 2d_1 e^{-t^2/(2\sigma_{1,F}^2\|\theta\|^2)} \quad (103)$$

$$(\because \psi(x) \leq x \ \forall x, W_1^{(F)}\theta \sim \mathcal{N}(0, \sigma_{1,F}^2\|\theta\|^2 I_{d_1^{(F)}})) \quad (104)$$

$$\implies P[\max_i |(W_1^{(F)}\theta)_i| > t] \leq \delta \quad (105)$$

$$(\text{Set } \delta = 2d_1 e^{-t^2/(2\sigma_{1,F}^2\|\theta_0\|^2)} = e^{-Cd_1}) \quad (106)$$

$$\implies P[\sqrt{d_1^{(F)}} \max_i |(W_1^{(F)}\theta)_i| \leq C'\sigma_1^{(F)}\|\theta\|d_1^{(F)}] > 1 - e^{-Cd_1} \quad (107)$$

Thus, for ensuring 1.) holds, we will demand the following:  $(3.47\varepsilon\sigma_1^{(F)}\sigma_2^{(F)}d_1^{(F)}) \cdot \left(\frac{7}{4}\sigma_2^{(F)}\sqrt{d_1^{(F)}}\right) \cdot (C'\sigma_1^{(F)}\|\theta_0\|d_1^{(F)}) \lesssim \frac{R^2}{32}$ . This will yield the following sufficient condition on  $\sigma_1^{(F)}$  and  $\sigma_2^{(F)}$ :

$$(\sigma_1^{(F)})^2 \cdot (\sigma_2^{(F)})^2 \lesssim \frac{R^2}{195\varepsilon C'\|\theta_0\|(d_1^{(F)})^{2.5}} \quad (108)$$

By definition the radius  $R \geq \frac{\mu_{\text{Jac}}^{(F)}}{2\beta_F}$ . Substituting the lower bound for minimum singular value and Lipschitzness constant for Jacobian of network  $F$  from Lemmas F.1-F.2, we obtain:

$$\frac{(\sigma_1^{(F)})^4 \cdot (\sigma_2^{(F)})^2 \cdot \|\theta_0\|}{\left(\frac{1}{2} - (\sigma_1^{(F)})\|\theta_0\|\sqrt{\frac{Cd_1^{(F)}}{\pi}}\right)^2} \lesssim \frac{\pi}{\varepsilon \cdot (d_1^{(F)})^{3.5}} \quad (109)$$

Analogous reasoning with  $R \geq \frac{\mu_{\text{Jac}}^{(G)}}{2\beta_G}$  for ensuring 4.) holds true in case of  $G(\phi_0)$  gives us a similar condition on  $\sigma_1^{(G)}$  and  $\sigma_2^{(G)}$ :

$$\frac{(\sigma_1^{(G)})^4 \cdot (\sigma_2^{(G)})^2 \cdot \|\phi_0\|}{\left(\frac{1}{2} - (\sigma_1^{(G)})\|\phi_0\|\sqrt{\frac{Cd_1^{(G)}}{\pi}}\right)^2} \lesssim \frac{\pi}{\varepsilon \cdot (d_1^{(G)})^{3.5}} \quad (110)$$

For ensuring 2.), by Lemmas F.1-F.2 and using  $R \geq \frac{\mu_{\text{Jac}}^{(F)}}{2\beta_F}$ , we see that we need  $(3.47\sigma_{\max}(A)\sigma_1^{(G)}\sigma_2^{(G)}d_1^{(G)}) \cdot \left(\frac{7}{4}\sigma_2^{(F)}\sqrt{d_1^{(F)}}\right) \cdot (C'\sigma_1^{(F)}\|\theta_0\|d_1^{(F)}) \lesssim \frac{R^2}{32}$  which yields the following sufficient condition:

$$(3.47\sigma_1^{(G)}\sigma_2^{(G)}d_1^{(G)}) \left(\frac{7}{4}\sigma_2^{(F)}\sqrt{d_1^{(F)}}\right) (C'\sigma_1^{(F)}\|\theta_0\|d_1^{(F)}) \lesssim \frac{R^2}{32\sigma_{\max}(A)} \quad (111)$$

$$= \frac{(\mu_{\text{Jac}}^{(F)})^2}{128\sigma_{\max}(A)\beta_F^2} \quad (112)$$

$$\lesssim \frac{\left(\frac{1}{2} - (\sigma_1^{(F)})\|\theta_0\|\sqrt{\frac{Cd_1^{(F)}}{\pi}}\right)^2 \cdot \pi}{\sigma_{\max}(A)(\sigma_1^{(F)})^2 d_1^{(F)}} \quad (113)$$

(By Lemma F.1 – F.2)

$$\implies \frac{(\sigma_1^{(G)}\sigma_2^{(G)})((\sigma_1^{(F)})^3\sigma_2^{(F)})\|\theta_0\|}{\left(\frac{1}{2} - (\sigma_1^{(F)})\|\theta_0\|\sqrt{\frac{Cd_1^{(F)}}{\pi}}\right)^2} \lesssim \frac{\pi}{\sigma_{\max}(A)(d_1^{(F)})^{2.5}} \quad (114)$$

Similarly, for ensuring 3.), we see that we need  $(3.47\sigma_{\max}(A)\sigma_1^{(F)}\sigma_2^{(F)}d_1^{(F)}) \cdot \left(\frac{7}{4}\sigma_2^{(G)}\sqrt{d_1^{(G)}}\right) \cdot \left(C'\sigma_1^{(G)}\|\phi_0\|d_1^{(G)}\right) \lesssim \frac{R^2}{32}$  which yields the following sufficient conditions when we use  $R \geq \frac{\mu_{\text{inc}}^{(G)}}{2\beta_g}$ :

$$\frac{(\sigma_1^{(F)}\sigma_2^{(F)})((\sigma_1^{(G)})^3\sigma_2^{(G)})\|\phi_0\|}{\left(\frac{1}{2} - (\sigma_1^{(G)})\|\phi_0\|\sqrt{\frac{Cd_1^{(G)}}{\pi}}\right)^2} \lesssim \frac{\pi}{\sigma_{\max}(A)(d_1^{(G)})^{2.5}} \quad (115)$$

(116)

Thus, w.p.  $\geq 1 - 4e^{-\frac{d_1^{(F)}}{64}} - 4e^{-\frac{d_1^{(G)}}{64}} - e^{-Cd_1^{(F)}} - e^{-Cd_1^{(G)}}$ , we stay within a ball around the random initializations  $\mathcal{B}((\theta_0, \phi_0), R)$  thereby ensuring min-max objective satisfies 2-sided PL-condition. By Lemma 3.2, given that we have chosen appropriate fixed learning rates as per Lemma E.7, we are now guaranteed to reach the saddle point.  $\square$

## G Proofs for Neural-Parameters Min-Max Games

The following lemma establishes a sharp connection between the spectral properties of the input data and the initial conditioning of the neural network's Jacobian, highlighting how data diversity directly influences the minimum singular value at initialization.

**Lemma G.1** (Lemma 3.7 in Main Paper; Lemma 3 & Appendix E.1–E.4 in [106]). *Suppose that a two-layer neural network,  $F_\theta$ , as defined in Definition 2.3, satisfies Assumption 2.4 and  $\tau^{r_1}|\psi(a)| \leq |\psi(\tau a)| \leq \tau^{r_2}|\psi(a)|$ , respectively for all  $a$ ,  $0 < \tau < 1$ , and some constants  $r_1, r_2$ . Then the neural network Jacobian for a random Gaussian initialization  $\theta_0 = ((W_1^{(F)})_0, (W_2^{(G)})_0)$  has the following lower bounds on its smallest singular value w.p.  $\geq 1 - (p_1 + p_2)$ :*

$$\mu_{\text{Jac}}^{(F)} \geq (\sigma_1^{(F)})^{r_1} \sqrt{(1 - \delta_1) \frac{c_t^2}{t!} d_1^{(F)}} \cdot \sigma_{\min}(X^{*t}) \quad (117)$$

We have the following upper bound on its largest singular value w.p.  $\geq 1 - (p_1 + p_3 + p_4)$ :

$$\begin{aligned} \nu_{\text{Jac}}^{(F)} \lesssim & \sigma_2^{(F)} \dot{\psi}_{\max} \sigma_{\max}(X) \sqrt{d_1^{(F)}} + (\sigma_1^{(F)})^{r_1} \sqrt{(1 + \delta_2)(c_1^2 + c_\infty^2) d_1^{(F)}} \sigma_{\max}(X) \\ & + (\sigma_1^{(F)})^{r_2} |c_0| \sqrt{(1 + \delta_2) d_1^{(F)}} n \end{aligned} \quad (118)$$

And the smoothness constant for the neural network can be computed as

$$\beta_F = \sqrt{2} \sigma_{\max}(X) (\dot{\psi}_{\max} + \ddot{\psi}_{\max} \chi_{\max}) \quad (119)$$

where  $\chi_{\max} = \sup_{W_2^{(F)}} \sigma_{\max}(W_2^{(F)})$ . Here  $\{c_i\}_i$  denote Hermite expansion coefficients corresponding to  $\psi((W_1^{(F)})_0 X)$ ,  $\delta_j > 0 \forall j \in [4]$ ,  $p_1 = (d_1^{(F)})^{-Ck_1 d_0^{(F)}} + (d_1^{(F)})^{-Ck_2 d_2^{(F)}}$  for universal constant  $C$  with sufficiently large  $k_1, k_2$ ,  $p_2 = \exp\left(-\left(\frac{\delta_1 \sigma_{\min}(\mathbb{E}[M_0])}{4\dot{\psi}_{\max}^2 \sigma_{\max}^2(X) k_1 \sigma_1^{(F)} \sqrt{d_0^{(F)} \log d_1^{(F)}}}\right)^2\right)$  where  $M_0 = \psi(X^\top ((W_1^{(F)})_0^\top) \psi((W_1^{(F)})_0 X)$ ,  $p_3 = \exp\left(-\left(\frac{\delta_2 \sigma_{\max}(\mathbb{E}[M_0])}{4\dot{\psi}_{\max}^2 \sigma_{\max}^2(X) k_1 \sigma_1^{(F)} \sqrt{d_0^{(F)} \log d_1^{(F)}}}\right)^2\right)$  &  $p_4 = e^{-C' d_1^{(F)}}$  for a universal constant  $C'$ .

Before we present the following lemma, we offer some context and motivation: In input-optimization games, the gradient norm structure naturally arises from the formulation of hidden bilinear zero-sum games. In more general settings, the relevant properties are detailed in Appendix D. The lemma below demonstrates that, under appropriate initialization and sufficient overparameterization, the neural network output remains bounded from above in terms of spectral properties of the data matrix with high probability. This property will play a critical role in ensuring that the optimization trajectory remains confined within the well-conditioned region (the ball).

**Lemma G.2** (Lemma 3.7 in Main Paper; Neural network output is bounded w.h.p.; Appendix E.5 in [106]). *Consider a neural network  $F_\theta$  with parameters  $\theta = (W_1^{(F)}, W_2^{(F)})$  as defined in Lemma G.1 above. Suppose we randomly initialize the neural network at  $\theta_0$  by choosing  $\sigma_1^{(F)}$  and  $\sigma_2^{(G)}$  such that*

$$\sigma_1^{(F)} \sigma_2^{(F)} \lesssim \frac{1}{\sqrt{d_0^{(F)} d_1^{(F)}}}$$

Then w.p.  $\geq 1 - p_1 - p_5$ , the neural network output at this random initialization  $\theta_0$  for the given training data  $\mathcal{D}_F$  (as described in Assumption 2.4) is bounded from above as follows:

$$\|F_{\theta_0}(\mathcal{D}_F)\| \lesssim \delta_3 k_1 k_2 \sigma_{\max}(X) \quad (120)$$

where  $p_1 = (d_1^{(F)})^{-Ck_1 d_0^{(F)}} + (d_1^{(F)})^{-Ck_2 d_2^{(F)}}$  for universal constant  $C$  with sufficiently large  $k_1, k_2$ ,  $\delta_3 > 0$ , and  $p_5 = e^{-C\delta_3^2}$  for some universal constant  $C$ .

**Theorem G.3** (Theorem 3.8 in Main Paper; HSCSC Games with AltGDA). *Suppose there are two two-layer neural networks,  $F_\theta, G_\phi$  as defined in Definition 2.3 which satisfy Assumption 2.4 and  $\tau^{r_1}|\psi(a)| \leq |\psi(\tau a)| \leq \tau^{r_2}|\psi(a)|$ , respectively for all  $a$ ,  $0 < \tau < 1$ , and some constants  $r_1, r_2$ . Suppose the network parameters  $\theta_0$  and  $\phi_0$  are randomly initialized as in Assumption 3.6 with  $(\sigma_1^{(F)}, \sigma_2^{(F)})$  and  $(\sigma_1^{(G)}, \sigma_2^{(G)})$ , respectively, which satisfy*

$$\sigma_1^{(F)} \sigma_2^{(F)} \lesssim \frac{1}{\sqrt{d_0^{(F)} d_1^{(F)}}} \quad \text{and} \quad \sigma_1^{(G)} \sigma_2^{(G)} \lesssim \frac{1}{\sqrt{d_0^{(G)} d_1^{(G)}}} \quad (121)$$

and suppose that the hidden layer widths  $d_1^{(F)}$  and  $d_1^{(G)}$  for the two networks  $F$  and  $G$  satisfy

$$d_1^{(F)} = \tilde{\Omega} \left( \mu_\theta^2 \frac{n^3}{d_0^{(F)}} \right) \quad \& \quad d_1^{(G)} = \tilde{\Omega} \left( \mu_\phi^2 \frac{n^3}{d_0^{(G)}} \right) \quad (122)$$

where the datasets  $(\mathcal{D}_F, \mathcal{D}_G)$  for both the players are assumed to be of size  $n$ . Then Alternating Gradient-Descent-Ascent procedure with appropriate fixed learning rates  $\eta_\theta, \eta_\phi$  (see Lemma E.7) for an  $(\mu_\theta, \mu_\phi)$ -HSCSC and  $L_{\nabla \mathcal{L}}$ -smooth min-max objective  $\mathcal{L}_{\mathcal{D}}(F_\theta, G_\phi)$  as defined in Equation 1 satisfying Assumption 2.1 converges to the saddle point  $(\theta^*, \phi^*)$  exponentially fast with probability at least  $1 - (p_1 + p_2 + p_3 + p_4 + p_5) - (p_1 + p'_2 + p'_3 + p'_4 + p'_5)$  (Here, the failure probabilities  $p_j$ 's and  $p'_j$ 's are defined for networks  $F_\theta$  and  $G_\phi$ , respectively, as per Lemmas G.1-G.2).

*Proof.* If we randomly initialize the neural network at  $\theta_0 = ((W_1^{(F)})_0, (W_2^{(G)})_0)$  as per the stated initialization scheme in Assumption 3.6 with Equation (121), we have by Lemma G.2 that w.p.  $\geq 1 - p_1 - p_5$ :

$$\|F_{\theta_0}(\mathcal{D}_F)\| \lesssim \delta_3 k_1 k_2 \sigma_{\max}(X) \quad (123)$$

where  $p_1, p_5$  are as defined in Lemma G.2. Analogous reasoning gives a similar bound for the output of initialization condition for the neural network  $G_\phi$  with data  $\mathcal{D}_G$ .

Since our min-max objective  $\mathcal{L}_{\mathcal{D}}(F_\theta, G_\phi)$  is separable as defined in Equation 1, we can start by rewriting the bilinear component  $I_2^{\mathcal{D}}(F_\theta, G_\phi) = (F_\theta(\mathcal{D}_F))^\top A(G_\phi(\mathcal{D}_G))$ . Firstly, we can compute the gradients for the min-max objective as follows given data  $\mathcal{D} = (\mathcal{D}_F, \mathcal{D}_G)$ :

$$\nabla_\theta L_{\mathcal{D}}(F_\theta, G_\phi) = \nabla_\theta (I_1^{\mathcal{D}_F}(F_\theta) + I_2^{\mathcal{D}}(F_\theta, G_\phi)) \quad (124)$$

$$= (\nabla_\theta F_\theta(\mathcal{D}_F))^\top (\nabla_{z=F_\theta(\mathcal{D}_F)} I_1^{\mathcal{D}_F}(z)) + (\nabla_\theta F_\theta(\mathcal{D}_F))^\top A G_\phi(\mathcal{D}_G) \quad (125)$$

$$\nabla_\phi L_{\mathcal{D}}(F_\theta, G_\phi) = \nabla_\phi (-I_3^{\mathcal{D}_G}(G_\phi) + I_2^{\mathcal{D}}(F_\theta, G_\phi)) \quad (126)$$

$$= -(\nabla_\phi G_\phi(\mathcal{D}_G))^\top (\nabla_{z=G_\phi(\mathcal{D}_G)} I_3^{\mathcal{D}_G}(z)) + (\nabla_\phi G_\phi(\mathcal{D}_G))^\top A F_\theta(\mathcal{D}_F) \quad (127)$$

By Assumption 2.1(iv) on the gradient norm of strongly-convex functions, triangle inequality, and submultiplicativity of operator norm, we can say that the gradient norms of our separable min-max objective can be upper bounded as follows:

$$\begin{aligned} \|\nabla_\theta L_{\mathcal{D}}(F_\theta, G_\phi)\| &\leq \|(\nabla_\theta F_\theta(\mathcal{D}_F))^\top\| \left( A_1^{(F)} \|F_{\theta_0}(\mathcal{D}_F)\| + A_2^{(F)} \text{diam}(\mathcal{Y}^{(F)}) + A_3^{(F)} \right) \\ &\quad + \|(\nabla_\theta F_\theta(\mathcal{D}_F))^\top\| \|A\| \|G_\phi(\mathcal{D}_G)\| \end{aligned} \quad (128)$$

$$\begin{aligned} \|\nabla_\phi L_{\mathcal{D}}(F_\theta, G_\phi)\| &\leq \|(\nabla_\phi G_\phi(\mathcal{D}_G))^\top\| \left( A_1^{(G)} \|G_{\phi_0}(\mathcal{D}_G)\| + A_2^{(G)} \text{diam}(\mathcal{Y}^{(G)}) + A_3^{(G)} \right) \\ &\quad + \|(\nabla_\phi G_\phi(\mathcal{D}_G))^\top\| \|A\| \|F_\theta(\mathcal{D}_F)\| \end{aligned}$$

Since  $\mathcal{L}(\theta, \phi)$  is  $(\mu_\theta, \mu_\phi)$ -hidden-strongly-convex-strongly-concave, by Fact 2.6 it also satisfies the 2-sided PL-condition with  $(\mu_\theta \cdot \sigma_{\min}^2(\nabla_\theta F_\theta), \mu_\phi \cdot \sigma_{\min}^2(\nabla_\phi G_\phi))$  PL-moduli w.p.  $\geq 1 - p_1 - p_2$  (where  $p_1, p_2$  as defined in Lemma G.1). Thus we can utilise path-length bound as derived in Lemma 3.2 which leaves us with controlling the potential  $P_0$  for ensuring convergence to the saddle point. Given the loss gradients above (Equation (128)) and using the sufficient condition for ensuring iterates do not leave the ball  $\mathcal{B}((\theta_0, \phi_0), R)$  (where  $R = \frac{\max\{\mu_{\text{Jac}}^{(F)}, \mu_{\text{Jac}}^{(G)}\}}{\min\{\beta_F, \beta_G\}}$  as defined in Section 3) thus

ensuring non-singular Jacobian inside the ball for both the neural networks (Lemma E.7), we require the following:

$$\begin{aligned} & \left( \underbrace{\|(\nabla_{\theta} F_{\theta_0}(\mathcal{D}_F))^{\top}\| \cdot \left( A_1^{(F)} \|F_{\theta_0}(\mathcal{D}_F)\| + A_2^{(F)} \text{diam}(\mathcal{Y}^{(F)}) + A_3^{(F)} \right)}_{T_1} \right. \\ & \quad \left. + \underbrace{\|(\nabla_{\theta} F_{\theta_0}(\mathcal{D}_F))^{\top}\| \|A\| \|G_{\phi_0}(\mathcal{D}_G)\|}_{T_2} \right. \\ & \quad \left. + \underbrace{\|(\nabla_{\phi} G_{\phi_0}(\mathcal{D}_G))^{\top}\| \cdot \left( A_1^{(G)} \|G_{\phi_0}(\mathcal{D}_G)\| + A_2^{(G)} \text{diam}(\mathcal{Y}^{(G)}) + A_3^{(G)} \right)}_{T_3} \right. \\ & \quad \left. + \underbrace{\|(\nabla_{\phi} G_{\phi_0}(\mathcal{D}_G))^{\top}\| \|A\| \|F_{\theta_0}(\mathcal{D}_F)\|}_{T_4} \right) \lesssim \frac{R^2}{8} \end{aligned}$$

In order to ensure the above, we will demand the following:

1.  $T_1 \lesssim \frac{R^2}{32}$
2.  $T_2 \lesssim \frac{R^2}{32}$
3.  $T_3 \lesssim \frac{R^2}{32}$
4.  $T_4 \lesssim \frac{R^2}{32}$

We will show arguments for the case of the ‘min’ player (neural network  $F_{\theta}$ ) here. Exactly the same arguments provide the analogous result for the ‘max’ player (neural network  $G_{\phi}$ ).

For ensuring (1.)–(4.), we will use the fact that  $\sigma_{\max}(\nabla_{\theta} F_{\theta_0}(\mathcal{D}_F)) \leq \nu_{\text{Jac}}^{(F)}$ ,  $\sigma_{\max}(\nabla_{\phi} G_{\phi_0}(\mathcal{D}_G)) \leq \nu_{\text{Jac}}^{(G)}$ , Lemma G.1 for upper bounds on  $\nu_{\text{Jac}}^{(F)}$ , and  $\nu_{\text{Jac}}^{(G)}$  and smoothness constants for two-layer neural networks along with the upper bounds on neural network outputs for  $F$  and  $G$  as derived above in Lemma G.2.

Thus, a sufficient condition for ensuring 1.) would be to use  $R \geq \frac{\mu_{\text{Jac}}^{(F)}}{2\beta_F}$  and see that w.p.  $\geq 1 - p_1 - p_2 - p_3 - p_4 - p_5$  the following holds (assuming  $|c_0|$  is sufficiently large s.t.  $|c_0| \sqrt{(1 + \delta_2) d_1^{(F)} n}$  becomes the dominating term in  $\nu_{\text{Jac}}^{(F)}$ ):

$$\underbrace{C_1 \cdot \left( |c_0| \sqrt{(1 + \delta_2) d_1^{(F)} n} \right) \cdot \left( A_1^{(F)} \delta_3 k_1 k_2 \sigma_{\max}(X) + A_2^{(F)} \text{diam}(\mathcal{Y}^{(F)}) + A_3^{(F)} \right)}_{(LHS)} \lesssim \frac{1}{32} \left( \frac{\mu_{\text{Jac}}^{(F)}}{2\beta_F} \right)^2$$

$$\implies (LHS) \lesssim \frac{(\sigma_1^{(F)})^{2r_1} (1 - \delta_1) (c_t^2/t!) d_1^{(F)} \sigma_{\min}^2(X^{*t})}{2(\sigma_{\max}(X))^2 (\dot{\psi}_{\max} + \ddot{\psi}_{\max} \chi_{\max})^2} \quad (\text{By Lemma G.1}) \quad (129)$$

$$\implies d_1^{(F)} \gtrsim \frac{(|c_0|^2 (1 + \delta_2) n) \cdot (\sigma_{\max}(X))^4 (\dot{\psi}_{\max} + \ddot{\psi}_{\max} \chi_{\max})^4 \cdot (A_1^{(F)} \delta_3 k_1 k_2 \sigma_{\max}(X))^2}{(\sigma_1^{(F)})^{2+2r_1} (1 - \delta_1)^2 (c_t^4/(t!)^2) \sigma_{\min}^4(X^{*t})} \quad (130)$$

$$\implies d_1^{(F)} \gtrsim \frac{(|c_0|^2 (1 + \delta_2) n) \cdot (\sigma_{\max}(X))^4 (\dot{\psi}_{\max} + \ddot{\psi}_{\max} \chi_{\max})^4 \cdot (A_1^{(F)} \delta_3 k_1 k_2 \sigma_{\max}(X))^2}{(\sigma_1^{(F)})^{2+2r_1} (1 - \delta_1)^2 (c_t^4/(t!)^2) \sigma_{\min}^4(X^{*t})} \quad (131)$$

$$\therefore d_1^{(F)} \gtrsim \xi(C_{\delta}, t, \psi, \{c_i\}_{i \geq 0}) \frac{n(A_1^{(F)})^2 \sigma_{\max}^6(X)}{\sigma_{\min}^4(X^{*t})} \quad (132)$$



where  $\delta_4 = \max\{k_1, k_2\}$ ,  $C_\delta = \{\delta_1, \delta_2, \delta_3, \delta_4\}$ , and

$$\xi(C_\delta, t, \psi, \{c_i\}_{i \geq 0}) = \frac{(|c_0|^2(1 + \delta_2)) \cdot (\dot{\psi}_{\max} + \ddot{\psi}_{\max} \chi_{\max})^4 \cdot (\delta_3 k_1 k_2)^2}{(\sigma_1^{(F)})^{2+2r_1} (1 - \delta_1)^2 (c_t^4 / (t!)^2)}$$

Here, as per our Assumption 2.4 on the data and arguing along the lines of Section 2.1 in Oymak and Soltanolkotabi [86], when we use the fact that  $\sigma_{\max}(X) \simeq \sqrt{\frac{n}{d_0^{(F)}}}$ ,  $\sigma_{\min}(X^{*t}) \simeq \sqrt{\frac{n}{(d_0^{(F)})^t}} \simeq 1^9$ , and  $n \simeq (d_0^{(F)})^t$  where  $t \geq 2^{10}$ , we get that:

$$d_1^{(F)} = \tilde{\Omega} \left( \frac{n \cdot n^3 \cdot (A_1^{(F)})^2}{(d_0^{(F)})^3 \cdot 1} \right) = \tilde{\Omega} \left( \frac{n^3 \mu_\theta^2}{d_0^{(F)}} \right) \quad (133)$$

In the second equality above, we used the observation from Appendix D that  $A_1 = \theta(\mu)$  where  $\mu$  is the strong-convexity modulus. Thus, the amount of overparameterization we need for network  $F_\theta$  is as follows:

$$d_1^{(F)} d_0^{(F)} = \tilde{\Omega}(n^3 \mu_\theta^2) \quad (134)$$

Analogous reasoning for ensuring (3.) with  $R \geq \frac{\mu_{\text{Jac}}^{(G)}}{2\beta_G}$  gives us w.p.  $1 - p'_1 - p'_2 - p'_3 - p'_4 - p'_5$ :

$$d_1^{(G)} \gtrsim \xi(L_{\mathcal{L}}, C'_\delta, t', \psi, \{c'_i\}_{i \geq 0}) \frac{n(A_1^{(G)})^2 \sigma_{\max}^6(X)}{\sigma_{\min}^4(X^{*t})} \quad (135)$$

Using arguments from Oymak and Soltanolkotabi [86] as done above for the case of 1.), we get a similar cubic overparameterization bound for the ‘max’ player,  $G_\phi$ , as well:

$$d_1^{(G)} d_0^{(G)} = \tilde{\Omega}(n^3 \mu_\phi^2) \quad (136)$$

We get the following w.p.  $\geq 1 - (p'_1 + p'_5) - (p_1 + p_2 + p_3 + p_4)$  by similar reasoning as above for ensuring 2.) holds along with using  $R \geq \frac{\mu_{\text{Jac}}^{(F)}}{2\beta_F}$ :

$$\begin{aligned} & \underbrace{\left( |c_0| \sqrt{(1 + \delta_2) d_1^{(F)} n} \right) \cdot \sigma_{\max}(A) \cdot (\delta'_3 k'_1 k'_2 \sigma_{\max}(X))}_{(LHS)} \lesssim \frac{1}{32} \left( \frac{\mu_{\text{Jac}}^{(F)}}{2\beta_F} \right)^2 \\ \implies (LHS) & \lesssim \frac{(\sigma_1^{(F)})^{2r_1} (1 - \delta_1) (c_t^2 / t!) d_1^{(F)} \sigma_{\min}^2(X^{*t})}{2(\sigma_{\max}(X))^2 (\dot{\psi}_{\max} + \ddot{\psi}_{\max} \chi_{\max})^2} \quad (\text{By Lemma G.1}) \quad (137) \\ \therefore d_1^{(F)} & \gtrsim \frac{(|c_0|^2 (1 + \delta_2) n) \cdot (\sigma_{\max}(X))^4 (\dot{\psi}_{\max} + \ddot{\psi}_{\max} \chi_{\max})^4 \cdot \sigma_{\max}^2(A) \cdot (\delta'_3 k'_1 k'_2 \sigma_{\max}(X))^2}{(\sigma_1^{(F)})^{2+2r_1} (1 - \delta_1)^2 (c_t^4 / (t!)^2) \sigma_{\min}^4(X^{*t})} \quad (138) \end{aligned}$$

$$\implies d_1^{(F)} \gtrsim \xi(A, C_{(\delta, \delta')}, t, \psi, \{c_i\}_{i \geq 0}) \frac{n \sigma_{\max}^6(X)}{\sigma_{\min}^4(X^{*t})} \quad (139)$$

Again, using arguments from Oymak and Soltanolkotabi [86] above, we get a similar cubic overparameterization bound for the ‘min’ player,  $F_\theta$ , as above:

$$d_1^{(F)} d_0^{(F)} = \tilde{\Omega}(n^3) \quad (140)$$

Applying reasoning analogous to that for ensuring (2.) to the case of ensuring (4.) holds, by using  $R \geq \frac{\mu_{\text{Jac}}^{(G)}}{2\beta_G}$  we get w.p.  $\geq 1 - (p_1 + p_5) - (p'_1 + p'_2 + p'_3 + p'_4)$ :

$$d_1^{(G)} \gtrsim \xi(A, L_{\mathcal{L}}, C'_\delta, t', \psi, \{c'_i\}_{i \geq 0}) \frac{n \sigma_{\max}^6(X)}{\sigma_{\min}^4(X^{*t})} \quad (141)$$

<sup>9</sup>For a matrix  $W \in \mathbb{R}^{m \times n}$  and  $t \in \mathbb{Z}_{\geq 1}$ , the Khatri-Rao product is denoted as  $W^{*t} \in \mathbb{R}^{m^t \times n}$  with its  $j$ -th column defined as vector( $w_j \otimes \dots \otimes w_j$ )  $\in \mathbb{R}^{m^t}$  where  $\otimes$  denotes Kronecker product.

<sup>10</sup>In practice, one typically has  $n \simeq (d_0^{(F)})^t$  for  $t \geq 2$ .

Finally, as was done for the case of ensuring 1.), 3.) and 4.) above, we once again arguments from Oymak and Soltanolkotabi [86] for spectral properties of the training data  $\mathcal{D}$  and get a similar cubic overparameterization bound for the ‘max’ player,  $G_\phi$ , as well:

$$d_1^{(G)} d_0^{(G)} = \tilde{\Omega}(n^3) \quad (142)$$

Thus, w.p.  $\geq 1 - (p'_1 + p'_5) - (p_1 + p_2 + p_3 + p_4)$ , we stay within a ball around the random initializations  $\mathcal{B}((\theta_0, \phi_0), R)$  thereby ensuring min-max objective satisfies 2-sided PL-condition. By Lemma 3.2, given that we have chosen appropriate fixed learning rates as per Lemma E.7, we are now guaranteed to reach the saddle point. □

**Remark G.4.** The proof above requires activation function to not be an odd function for ensuring  $c_0 \neq 0$ .

**Remark G.5** (Effects of assumption about  $\sigma_{\max}(X)$  on amount of overparameterization). As noted in the footnote pertaining to  $\sigma_{\max}(X)$  for the data matrix  $X$  in Assumption 2.5, if all we know about the data matrix is that it’s row-normalized and that it’s *not* a random matrix (e.g. random Gaussian matrix), then we can conclude that  $\sigma_{\max}(X) = O(\sqrt{n})$ . Using this bound on the maximum singular value of the data matrix instead, we can conclude from Equations (132), (135), (139), and (141) that

$$d_1^{(F)} = \tilde{\Omega}(n^4) \quad (143)$$

$$d_1^{(G)} = \tilde{\Omega}(n^4) \quad (144)$$

Since we have  $n \simeq (d_0^{(F)})^t$  ( $t \geq 2$ ) in practice for the MIN player  $F_\theta$  (analogously,  $n \simeq (d_0^{(G)})^t$  for the MAX player  $G_\phi$ ), we can conclude that the amount of overparameterization needed for both the players is more than the cubic overparameterization when the data matrix is, for example, an i.i.d. random Gaussian matrix:

$$d_1^{(F)} d_0^{(F)} = \tilde{\Omega}(n^{4+1/t}) \quad (145)$$

$$d_1^{(G)} d_0^{(G)} = \tilde{\Omega}(n^{4+1/t}) \quad (146)$$

## H Clarifications

### H.1 Smoothness on variables or Map

In the main paper, we state the following assumption regarding the objective function:

**Assumption H.1** (Smoothness, Hidden Strong Convexity, and Gradient Control).

- (i) **Smoothness:** Each sample-wise loss  $\ell(y, h = \text{Map}_w(x))$  is differentiable and  $L$ -smooth with respect to  $h$ .
- (ii) **Coupling Structure:** Each bilinear coupling matrix  $A(x_i, x_j, y_i, y_j)$  is known, fixed, and has bounded operator norm.
- (iii) **Hidden Strong Convexity:** Each sample-wise loss  $\ell(y, h = \text{Map}_w(x))$  is strongly convex with respect to the neural network output  $h$ .
- (iv) **Gradient Growth Condition:** There exist constants  $A_1, A_2, A_3 > 0$  such that for all  $h \in \mathbb{R}^{d_{\text{out}}}$  and  $y \in \mathcal{Y}$ , the latent gradient of each loss satisfies:

$$\|\nabla_h \ell(y, h)\| \leq A_1 \|h\| + A_2 \text{diam}(\mathcal{Y}) + A_3.$$

To compute the smoothness of the composition  $\ell(y, \text{Map}_w(x))$  with respect to  $w$ , we invoke the following classical result<sup>11</sup>:

**Lemma H.3** (Composition Smoothness, adapted from Proposition 2(c) in [131]). *Let  $f : \mathbb{R}^d \rightarrow \mathbb{R}$  be a closed, convex function that is  $L_f$ -locally-Lipschitz on a Euclidean ball  $\mathcal{B}(x_0, R)$  for some fixed  $x_0 \in \mathbb{R}^d$  and  $R > 0$  and let  $g : \mathbb{R}^n \rightarrow \mathbb{R}^d$  be an  $L_g$ -smooth function. Then, the composition  $f \circ g$  is  $L_f L_g$ -smooth in the Euclidean ball  $\mathcal{B}(x_0, R)$ .*

### H.2 Refined Upper Bound Expression for Lyapunov Potential $P_0$

For clarity and presentation purposes, the main paper presents a simplified—yet qualitatively accurate—upper bound on the initial potential  $P_0$ . In appendix, we provide the precise formulation that captures the correct dependence on constants and exponents. For completeness, we restate both results below:

The key distinction in the refined expression lies in the appearance of additional quadratic terms. As we show in the accompanying proof, these higher-order contributions can be effectively controlled through suitable initialization and appropriately chosen step sizes. Thus, the improved bound yields tighter theoretical insight without compromising practical applicability.

---

<sup>11</sup>

**Remark H.2.** This adaptation is necessary, as a function cannot simultaneously be globally Lipschitz (bounded gradients) and strongly convex (increasing gradient norm) in the unconstrained setting. However, under sufficient overparameterization and appropriate random initialization, we show that the AltGDA iterates remain within a bounded region where these properties hold locally. Thus, our assumption of local Lipschitzness of latent loss, the induced smoothness and the hidden strong convexity within a Euclidean ball is both theoretically consistent and empirically valid.

**Main Paper Version:**

**Lemma 3.3** (Upper Bound on Initial Potential  $P_0$ ). *Suppose the min-max objective  $\mathcal{L}(\theta, \phi)$  is  $L_{\mathcal{L}}$ -Lipschitz and satisfies a two-sided PL condition with constants  $(\mu_{\theta}, \mu_{\phi})$ . Then the initial Lyapunov potential  $P_0 \leq L_{\mathcal{L}} (C_1 \cdot \|\nabla_{\theta} \mathcal{L}(\theta_0, \phi_0)\| + C_2 \cdot \|\nabla_{\phi} \mathcal{L}(\theta_0, \phi_0)\|)$ , where  $C_1, C_2 = \Theta(L_{\mathcal{L}}/\mu_{\theta}^3)$ .*

**Appendix Version (Refined):**

**Lemma E.4** (Upper Bound on Initial Potential  $P_0$ ; Lemma 3.3 in Main Text). *Let  $F_{\theta}$  and  $G_{\phi}$  be neural network mappings such that they are  $\beta_F$  and  $\beta_G$  smooth as defined in Definition 2.3. Now let  $(\theta_0, \phi_0)$  be such that Jacobian singular values for both the networks are strictly positive and bounded from above and below,  $\mu_{Jac}^{(F)} \leq \sigma(\nabla_{\theta} F_{\theta_0}) \leq \nu_{Jac}^{(F)}$  and  $\mu_{Jac}^{(G)} \leq \sigma(\nabla_{\phi} G_{\phi_0}) \leq \nu_{Jac}^{(G)}$ . Suppose the min-max objective  $\mathcal{L}(\theta, \phi)$  is  $(\mu_{\theta}, \mu_{\phi})$ -HSCSC. Then the initial Lyapunov potential  $P_0$  can be bounded from above as:*

$$\begin{aligned}
P_0 &\leq \|(\nabla_{F_{\theta}} \mathcal{L}(F_{\theta_0}, G_{\phi_0}))^{\top}\| \cdot \nu_{Jac}^{(F)} \cdot \frac{1}{\mu_{\theta}(\mu_{Jac}^{(F)})^2} \cdot \|\nabla_{\theta} \mathcal{L}(\theta_0, \phi_0)\| \\
&\quad + \|(\nabla_{F_{\theta}} \mathcal{L}(F_{\theta_0}, G_{\phi_0}))^{\top}\| \cdot \beta_F \frac{1}{2\mu_{\theta}^2(\mu_{Jac}^{(F)})^4} \cdot \|\nabla_{\theta} \mathcal{L}(\theta_0, \phi_0)\|^2 \quad (36) \\
&\quad + (1 + \lambda) \cdot \|(\nabla_{G_{\phi}} \mathcal{L}(F_{\theta_0}, G_{\phi_0}))^{\top}\| \cdot \nu_{Jac}^{(G)} \cdot \frac{1}{\mu_{\phi}(\mu_{Jac}^{(G)})^2} \cdot \|\nabla_{\phi} \mathcal{L}(\theta_0, \phi_0)\| \\
&\quad + (1 + \lambda) \cdot \|(\nabla_{G_{\phi}} \mathcal{L}(F_{\theta_0}, G_{\phi_0}))^{\top}\| \cdot \beta_G \frac{1}{2\mu_{\phi}^2(\mu_{Jac}^{(G)})^4} \cdot \|\nabla_{\phi} \mathcal{L}(\theta_0, \phi_0)\|^2
\end{aligned}$$

### H.3 Random Initialization: How restrictive are our results?

We note the following for both the input games and neural games regarding random initializations:

1. **Neural Games:** Our main result (Theorem 3.8) assumes a commonly used initialization scheme (e.g., He or LeCun), with the only additional requirement being that the variances satisfy Equation (9) in the main text. Of course, bridging the gap between practice and theory, it remains an interesting open question whether the current polynomial overparameterization requirement can be reduced to linear. However, we note that – prior to our work – there were no existing theoretical results connecting initialization schemes with convergence guarantees in neural min-max games.
2. **Input Games:** In this setting, our results are even less restrictive regarding initialization. Specifically, we show that if the neural networks are randomly initialized from a standard Gaussian distribution, then AltGDA can compute the min-max optimal inputs. As discussed above, this is an *average-case* result, in the spirit of smoothed analysis. While it is theoretically expected that there exist neural architectures encoding hard min-max landscapes—potentially close to PPAD-hard instances—in practice, our result suggests that a randomly initialized neural min-max game is tractable under AltGDA.

## I Discussion & Future Work

This work initiates a principled framework for understanding optimization in hidden convex–concave min-max games, a setting central to the theory and practice of modern machine learning. By bridging overparameterization with spectral geometry and alternating dynamics, we show how convergence and equilibrium stability can emerge from architectural design and initialization. Beyond offering the first non-asymptotic guarantees for such hidden structures, our analysis reveals the potential of min-max learning as a structured alternative to unconstrained overfitting. We hope these insights inspire a broader rethinking of how optimization, architecture, and strategic interaction coalesce in scalable intelligent systems.

In this last section, we reflect on our overparameterization bounds in comparison to known results from single-agent minimization, and outline promising directions for future research.

While our analysis shares surface-level similarities with techniques from classical minimization problems, there are crucial structural differences. In the single-agent case, convergence is often guaranteed by showing that the Neural Tangent Kernel (NTK) remains well-conditioned near initialization, and that the loss is already small—a zero-order property.

By contrast, computing a Nash equilibrium in a min-max setting is inherently more subtle: the solution concept is first & second-order. Rather than merely minimizing a loss, we seek to simultaneously drive the gradients of both players to zero while respecting their opposing incentives—capturing the saddle-point nature of equilibrium. Consequently, our notion of being “close to optimality” requires the initialization to yield not only small gradient norms but also a geometric alignment between the descent and ascent directions. This structural gap underpins the difference in overparameterization requirements between the single-agent and multi-agent cases.

These insights naturally give rise to several open questions from deep learning and game theory point of view:

### I.1 Deep Learning Perspective:

#### • Sharper Overparameterization Bounds:

- Can we tighten the width–depth trade-offs for hidden min-max games, especially in non-bilinear or partially observable regimes?
- Our results suggest that overparameterization smooths the optimization landscape in simple bilinear games, but the precise scaling with respect to hidden-layer width and depth in *nonlinear* architectures remains unclear. A possible direction is to characterize phase transitions in convergence when width exceeds a critical threshold that depends on the spectral complexity or curvature of the game operator.

#### • Beyond Width and Smoothness:

- How does the depth of the architecture influence convergence in hidden games? Can we extend current results to networks with non-smooth activations such as ReLU, using tools beyond gradient-Lipschitz analysis?
- Smoothness assumptions simplify the analysis but obscure the behavior of realistic neural dynamics. We could instead exploit techniques from *non-smooth dynamical systems* and *proximal envelope* theory to handle non-smooth losses.
- Another open question is whether depth induces implicit averaging effects similar to stochastic smoothing, thereby stabilizing the dynamics in min–max training.

#### • Structural Guarantees in Multi-Agent PL Games:

- What are the necessary structural properties of multi-agent PL-type games that ensure convergence to a unique Nash equilibrium? The challenge lies in extending single-agent PL conditions to multi-agent systems where gradients interact. Are there generalized PL inequalities that capture cross-agent monotonicity?
- Investigating block-wise or coupled PL structures could reveal when independent gradient updates mimic joint gradient descent–ascent in strongly monotone regimes.

- **Computational Complexity:**
  - What is the inherent hardness of solving hidden convex–concave games with overparameterized models? Can we characterize tractable subclasses?
  - The inversion or injectivity verification of neural networks is known to be NP- or coNP-complete even for ReLU architectures (see, e.g., the COLT’25 paper “*Complexity of Injectivity and Verification of ReLU Neural Networks*”). How do such barriers propagate to the equilibrium computation problem when game payoffs are defined implicitly through network mappings?
  - The overparameterized setting often introduces implicit convexification. Can we formalize when this leads to *provable polynomial-time convergence* versus when training remains PPAD- or NP-hard?
- **From Neural Networks to Transformers:**
  - What explains the observed differences in scaling laws between overparameterized feedforward networks and attention-based architectures in game-theoretic learning? Could these insights inform AI alignment and debate frameworks?
  - Transformers introduce dynamic reweighting of information through attention, which may alter the effective conditioning of the game Jacobian.
  - Understanding how self-attention layers modify optimization stability and expressivity could illuminate why Transformers exhibit faster equilibration or better robustness to adversarial perturbations.
- **Beyond Full Gradient Feedback:**
  - Much of the current analysis, including ours, assumes full gradient information. It remains an open and critical question whether similar benefits of overparameterization persist under bandit or partial-information settings.
  - A natural direction is to extend existing results to *stochastic feedback* or *bandit-gradient estimators* using variance-controlled or mirror-descent methods.
  - Another fundamental question: does overparameterization implicitly reduce the variance of policy-gradient estimators by averaging across redundant feature paths?

## I.2 Game Theory Perspective:

- **CCE with Neural Parametrizations (Normal-Form):**
  - *Representational question:* For a class of neural correlating devices  $g_\theta(z)$  that map public randomness  $z$  to joint actions, characterize when the induced set of implementable distributions is dense in the CCE polytope. What overparameterization (width/depth) suffices for  $\varepsilon$ -dense coverage uniformly across  $n$ -player games with bounded payoffs?
  - *Optimization vs. Calibration:* Standard no-regret dynamics imply convergence to CCE in the tabular case. With function approximation (shared neural critics/policies), give conditions (e.g., uniform stability, gradient-calibration bounds) under which the averaged joint play converges to an  $\varepsilon$ -CCE at rates that improve with network width (via better optimization landscapes) without blowing up statistical complexity.
  - *Implicit bias:* In the overparameterized (NTK) regime, training to minimize regret surrogates biases the joint distribution toward low-complexity mixtures. Can we quantify the *implicit regularization* toward “simple” CCEs (few extreme points in support) as a function of width, depth, and training dynamics?
- **CCE in Extensive-Form Games (EFG): EFCE, CEFCE, NFCCE via Nets.**
  - *Sequential structure:* Compare neural parameterizations for (i) NFCCE (normal-form coarse CCE), (ii) EFCE (extensive-form CE), and (iii) CEFCE (coarse EFCE). Give width/depth conditions under which sequence-form constraints (flow and realization-plan consistency) can be enforced by differentiable layers with projection or Lagrangian penalties.
  - *Counterfactual losses:* Can counterfactual regret minimization with neural policies/critics be shown to converge to EFCE/CEFCE when critics are overparameterized but trained with regularized Bellman residuals? Identify structural conditions (perfect recall, bounded branching, Lipschitz counterfactual values) that guarantee  $\tilde{O}(1/\sqrt{T})$  exploitability while using batched, partial counterfactual feedback.

- *Abstraction without tears*: Overparameterized policies can represent rich information-set strategies directly. Develop “learned abstraction” bounds: when does a deep policy with attention over histories match the exploitability of hand-crafted abstractions, and what width/depth yields  $\varepsilon$ -EFCE support recovery?
- **Markov (Stochastic) Games: Stationary CCE and Overparameterized Critics.**
  - *Stationary CCE*: Define a stationary CCE as a joint policy  $\pi$  with a correlating signal that is time-consistent across states. Give conditions under which joint no-regret learning with overparameterized  $Q$ -critics converges (in Cesàro average) to an  $\varepsilon$ -stationary CCE, with rates that depend on mixing/concentrability constants and the critic class capacity.
  - *Depth helps bootstrapping*: Hypothesis: deeper critics reduce the Bellman residual floor achievable by gradient methods, improving optimization error; width controls realizability. Provide a decomposition of the CCE gap into  $\text{Approximation}(\mathcal{F}_Q) + \text{Optimization}(\theta) + \text{Statistical}(\mathcal{F}_Q, \text{data})$ , and bound each term as a function of network depth/width and exploration coverage.
  - *Temporal correlation*: Analyze how correlating devices that are *state-dependent* (learned correlation) interact with Markovian dynamics. When does limited-bandwidth correlation (few bits per step) suffice for  $\varepsilon$ -CCE in ergodic MGs?
- **Overparameterization vs. Bellman–Eluder (BE) / Bellman Rank Complexity.**
  - *Function-class lens*: Let  $\mathcal{F}_Q$  be the  $Q$ -function class realized by a network in the linearized (NTK) regime. Its eluder dimension equals the feature dimension for linear classes; for deep nets, the *effective* eluder dimension depends on width, depth, and implicit regularization. Conjecture: with proper norm control (weight decay/early stopping), the *effective* BE dimension scales like the *stable rank* of the induced features, not the raw parameter count.
  - *Sample complexity for  $\varepsilon$ -CCE*: In two-player zero-sum Markov games with realizable  $Q^* \in \mathcal{F}_Q$ , the sample complexity to reach  $\varepsilon$ -CCE under fitted  $Q$ -type updates should scale as

$$\tilde{O}\left(\frac{\text{BE} - \dim(\mathcal{F}_Q) + \log(1/\delta)}{(1 - \gamma)^p \varepsilon^2}\right),$$

for a small integer  $p$  depending on the algorithm (e.g.,  $p \in \{2, 3\}$ ), assuming standard concentrability/mixing. Overparameterization *per se* does not hurt if the BE dimension is controlled by implicit/explicit regularization.

- *Width–complexity trade*: Identify regimes where increasing width improves optimization (faster approach to  $\theta^*$ ) while keeping BE-dimension nearly constant via margin-based or path-norm constraints, yielding *strictly better* time–sample trade-offs.
- *Transformers vs. MLPs*: Attention layers can implement dynamic state-action feature selection, potentially lowering the BE dimension for tasks with sparse predictive structure (long-range but low “intrinsic” rank). Formalize when attention reduces BE-dim relative to equally wide MLPs, explaining empirical scaling differences in Markov game benchmarks.
- **Bandit/Partial Information Extensions:**
  - *Bandit CCE*: For normal-form/Markov games with bandit feedback, derive  $\varepsilon$ -CCE rates when both policies and correlating devices are neural. Key ingredient: variance-controlled gradient surrogates (e.g., doubly-robust or control-variates) to keep estimation error compatible with a bounded BE dimension.
  - *Information complexity of correlation*: Quantify the *information budget* (bits of correlation, episodes of exploration) required to learn  $\varepsilon$ -CCE as a function of BE dimension and mixing; relate to *communication complexity* of implementing the equilibrium.

**Conclusion.** Our study sheds new light on the geometry of overparameterized min-max optimization by establishing the first precise convergence guarantees in hidden bilinear games. We demonstrate how overparameterization not only facilitates convergence but also implicitly regularizes the optimization landscape, ensuring robustness through well-conditioned spectral structure. Crucially, we bridge the gap between neural initialization and equilibrium computation, revealing that convergence in adversarial training is governed by deeper geometric principles. These insights open new avenues for understanding and designing scalable multi-agent learning systems, and we believe they mark a significant step toward principled foundations for modern generative and strategic AI.
